# Supplementary material for: Bacillus amyloliquefaciens TL Downregulates the Ileal Expression of Genes Involved in Immune Responses in Broiler Chickens to Improve Growth Performance
Source: Microorganisms. 2021 Feb 13;9(2):382. doi: 10.3390/microorganisms9020382 (PMC7918048; doi:10.3390/microorganisms9020382)
Supplement: Supplementary file 1 [file microorganisms-09-00382-s001.xlsx]

## Sheet: information
Bacillus amyloliquefaciens TL improves the ileal expression of genes involved in immune responses in broiler chickens
Y.X. Hong 1,2, Y. Cheng 1,2, L.L. Guan 3, Z.T. Zhou 1,2, X.W. Li 1,2, D.S. Shi 1,2 and Y.C. Xiao 1,2*
1. College of Veterinary Medicine, Huazhong Agricultural University, Wuhan 430070, China;
2. State Key Laboratory of Agricultural Microbiology, Huazhong Agricultural University, Wuhan 430070, China;
3. Department of Agricultural, Food & Nutritional Science, University of Alberta, Edmonton, AB T6G 2P5, Canada;
* Correspondence: xyc88@mail.hzau.edu.cn; Tel.: 8613971316525

## Sheet: Table S1
Supplementary Table S1. Information of sampled individuals
group	number	pen	body weight (21 day) (g)
C	1	1	845.24
	2	2	857,75
	3	3	859.59
	4	4	872.5
	5	1	859.11
	6	4	858.01
P	1	5	1084.56
	2	6	1132.94
	3	7	1100.22
	4	8	985.5
	5	6	1071.67
	6	8	1081.14

## Sheet: Table S2
Supplementary Table S2. Summary of sequencing data for each sample
Sample name	Raw reads	Clean reads	Mapped reads	Mapping rates (%)	Q30 (%)
C1	56389908	55521994	41533383	74.81	90.2
C2	50256652	49403200	36472781	73.83	90.72
C3	61846034	60638206	44713080	73.74	90.34
C4	59263344	58154654	43655200	75.07	90.41
C5	66797692	63721238	48462914	76.05	90.28
C6	78299000	63176666	47947905	75.89	90.43
P1	58290906	57062872	42950607	75.27	89.87
P2	70779208	69202580	52251778	75.51	90.01
P3	57515822	56504882	42587221	75.37	89.63
P4	62442262	61159068	46663949	76.3	89.96
P5	53494570	51976122	37153175	71.48	89.21
P6	46947744	45543650	31593409	69.37	88.62

## Sheet: Table S3a
Supplement Table S3a GO terms enriched by group C and P
54 common elements in "C-GO" and "P-GO":
GO:0051301~cell division
GO:0043123~positive regulation of I-kappaB kinase/NF-kappaB signaling
GO:0006260~DNA replication
GO:0006886~intracellular protein transport
GO:0007067~mitotic nuclear division
GO:0030433~ER-associated ubiquitin-dependent protein catabolic process
GO:0000398~mRNA splicing, via spliceosome
GO:0006457~protein folding
GO:0007049~cell cycle
GO:0006511~ubiquitin-dependent protein catabolic process
GO:0006412~translation
GO:0042147~retrograde transport, endosome to Golgi
GO:0098792~xenophagy
GO:0006397~mRNA processing
GO:0071260~cellular response to mechanical stimulus
GO:0007264~small GTPase mediated signal transduction
GO:0098779~mitophagy in response to mitochondrial depolarization
GO:0002230~positive regulation of defense response to virus by host
GO:0070062~extracellular exosome
GO:0005829~cytosol
GO:0005730~nucleolus
GO:0016020~membrane
GO:0005654~nucleoplasm
GO:0005739~mitochondrion
GO:0005737~cytoplasm
GO:0005764~lysosome
GO:0071013~catalytic step 2 spliceosome
GO:0005813~centrosome
GO:0005925~focal adhesion
GO:0022627~cytosolic small ribosomal subunit
GO:0043209~myelin sheath
GO:0000139~Golgi membrane
GO:0031965~nuclear membrane
GO:0016607~nuclear speck
GO:0032587~ruffle membrane
GO:0005769~early endosome
GO:0030496~midbody
GO:0044822~poly(A) RNA binding
GO:0003723~RNA binding
GO:0003735~structural constituent of ribosome
GO:0004402~histone acetyltransferase activity
GO:0005524~ATP binding
GO:0000166~nucleotide binding
GO:0061630~ubiquitin protein ligase activity
GO:0000980~RNA polymerase II distal enhancer sequence-specific DNA binding
GO:0017137~Rab GTPase binding
GO:0005096~GTPase activator activity
GO:0005525~GTP binding
GO:0019003~GDP binding
GO:0004722~protein serine/threonine phosphatase activity
GO:0031625~ubiquitin protein ligase binding
GO:0004842~ubiquitin-protein transferase activity
GO:0004197~cysteine-type endopeptidase activity
GO:0004715~non-membrane spanning protein tyrosine kinase activity

## Sheet: Table S3b
Supplement Table S3b GO terms uniquely enriched by group C
6 elements included exclusively in "C-GO":
GO:0008152~metabolic process
GO:0000045~autophagosome assembly
GO:0005789~endoplasmic reticulum membrane
GO:0017112~Rab guanyl-nucleotide exchange factor activity
GO:0003924~GTPase activity
GO:0070300~phosphatidic acid binding

## Sheet: Table S3c
Supplement Table S3c GO terms uniquely enriched by group P
6 elements included exclusively in "P-GO":
GO:0031647~regulation of protein stability
GO:0021762~substantia nigra development
GO:0005802~trans-Golgi network
GO:0004364~glutathione transferase activity
GO:0015485~cholesterol binding
GO:0003697~single-stranded DNA binding

## Sheet: Table S4a
Supplement Table S4a highly abundant genes in group C
Gene_id	C1_fpkm	C2_fpkm	C3_fpkm	C4_fpkm	C5_fpkm	C6_fpkm	P1_fpkm	P2_fpkm	P3_fpkm	P4_fpkm	P5_fpkm	P6_fpkm	P_readcount(PvsC)	C_readcount(PvsC)	log2FoldChange(PvsC)	pval(PvsC)	padj(PvsC)	significant(PvsC)
ENSGALG00000000122	1438.19	1348.92	1676.09	1673.89	1428.41	1811.83	1214.37	1482.12	1771.33	1603.63	1455.12	1283.04	24039	27023.8	-0.16885	0.31107	0.77487	FALSE
ENSGALG00000000150	524.081	590.307	562.105	668.318	590.091	667.317	452.135	603.696	637.834	657.809	608.693	488.416	15628.9	17187.7	-0.13716	0.4283	0.86474	FALSE
ENSGALG00000000318	1585.32	1448.44	1754.49	1829.79	1093.52	1889.59	1681.04	1308.34	1356.25	1252.43	1339.95	1989.59	34050.2	38944.5	-0.19376	0.20057	0.65976	FALSE
ENSGALG00000000474	1525.92	1193.17	1574.95	1519.07	1391.78	1490.28	1008.76	1361.22	1705.32	1449.56	1408.94	1088.88	11154.3	12753.5	-0.19329	0.25088	0.71901	FALSE
ENSGALG00000000608	980.135	852.195	902.198	842.11	892.77	845.843	970.644	908.309	895.429	930.748	966.458	978.475	48340.7	48044.9	0.0088548	0.96407	1	FALSE
ENSGALG00000000812	1147.5	1110.23	1213.19	1094.92	1174.8	1063.63	778.094	1095.49	1056.18	1047.06	1205.13	865.228	14791.4	17519.6	-0.24421	0.13929	0.57119	FALSE
ENSGALG00000000919	972.687	656.514	355.088	283.531	585.397	680.729	473.309	1179.9	789.097	609.529	566.047	511.502	31630.4	28220.9	0.16455	0.54212	0.93294	FALSE
ENSGALG00000001445	1940.23	4348.84	928.13	1351.26	3290.62	5572.65	5449.86	2540.3	3709.14	4294.46	3068.48	4399.62	61636.6	48298.9	0.3518	0.36618	0.82243	FALSE
ENSGALG00000001465	703.543	693.08	815.463	869.27	782.592	901.558	625.144	846.421	820.864	756.688	761.358	613.897	6895.16	7829.42	-0.18332	0.28174	0.74914	FALSE
ENSGALG00000001634	2183.67	2157.97	3188.28	3128.73	2584.74	2783.78	1907.68	2709.54	2982.22	2936.49	2635.01	2064.61	18505.2	20540.9	-0.15056	0.39266	0.84153	FALSE
ENSGALG00000001658	1596.74	1387.41	1881.42	2076.12	1607.25	1899.03	1443.12	1812.25	1853.31	1785.92	1601.93	1515.41	17628.8	19430.2	-0.14036	0.40799	0.85355	FALSE
ENSGALG00000001926	663.456	553.774	660.152	643.981	349.268	740.83	709.291	541.019	578.285	426.352	557.271	1301.77	9043.79	8455.94	0.096962	0.90197	1	FALSE
ENSGALG00000002157	2278.79	2050.33	3092.02	3199.56	2467.7	2834.02	2021.78	2338.81	2536.2	2516.64	2345.63	1910.1	18825.2	23188.8	-0.30076	0.067389	0.41521	FALSE
ENSGALG00000002160	5046.33	5027.4	4853.1	5925.53	5710.31	5943.95	4659.25	4637.4	4810.4	5203.69	5674.5	4946.84	94731.4	108532	-0.1962	0.19541	0.6541	FALSE
ENSGALG00000002210	1536.25	1416.17	1260.69	1295.98	1040.33	1489.11	1266.73	1331.8	1595.86	1405.38	1213.14	1258.8	16204.4	17053.2	-0.073658	0.72974	1	FALSE
ENSGALG00000002286	496.31	481.297	616.912	633.696	640.05	585.204	521.423	550.891	590.035	615.747	634.498	542.365	11601	12238.9	-0.077226	0.59486	0.95821	FALSE
ENSGALG00000002377	1167.5	1083.16	1133.9	1281.53	1217.14	1162.98	859.751	1127.66	1084.17	1102.02	1206.24	931.811	26547.4	31207.8	-0.23333	0.15194	0.5918	FALSE
ENSGALG00000002495	1043.23	1000.37	1061.63	930.635	876.945	1053.57	717.471	851.713	875.882	820.944	799.183	646.96	12050.2	16105.6	-0.4185	0.013047	0.19269	FALSE
ENSGALG00000002644	960.47	842.681	1175.5	1252.35	1086.93	1092.98	783.73	1047.35	1171.94	1122.7	975.516	838.525	12303.1	14004.9	-0.18691	0.26526	0.73288	FALSE
ENSGALG00000002771	3124.32	3772.97	4372.33	2686.65	3481.63	3567.5	3778.45	3601.72	4283.1	4100.55	4536.05	5147.1	59036.4	51530.6	0.19617	0.26854	0.73569	FALSE
ENSGALG00000002813	2115.61	1852.39	2567.22	2414.88	2149.86	2424.67	1783.64	2222.23	2566.72	2402.35	2115.13	1786.01	21193.8	23506.9	-0.14944	0.38595	0.83642	FALSE
ENSGALG00000002837	1779.66	1512.12	2237	2359.43	1869.32	2107.64	1633.45	1911.61	2106.13	2056.46	1839.26	1539.78	17521.6	19820.3	-0.17784	0.29239	0.75985	FALSE
ENSGALG00000002868	755.463	864.666	948.827	1014.52	870.801	936.478	605.849	834.462	888.777	855.815	826.133	671.701	14668.5	17795.1	-0.27876	0.094395	0.48131	FALSE
ENSGALG00000002932	881.536	906.001	948.708	1014.66	862.616	1131.57	763.487	881.339	1100.29	1137.98	802.953	711.302	12061.2	13545	-0.16738	0.35793	0.81615	FALSE
ENSGALG00000003197	1118.99	1222.37	1247.74	1459.16	1280.52	1357.61	937.68	1094.88	1250.91	1243.73	1107.77	976.87	17396.8	21322.6	-0.29356	0.074064	0.4301	FALSE
ENSGALG00000003213	2131.79	2619.2	1482.96	1629.97	1964.64	2571.22	1317.72	2002.51	1865.15	1985.42	1476.37	1430.11	18406.1	23743.6	-0.36736	0.064247	0.40422	FALSE
ENSGALG00000003521	1376.94	1319.29	1291.77	1311.91	1124.53	1394.98	1693.07	1163.3	1298.52	1147.34	1261.57	1811.37	30725.9	30451	0.012965	0.97595	1	FALSE
ENSGALG00000003770	578.036	622.534	552.582	517.874	513.239	596.277	463.493	596.229	570.117	599.846	607.777	600.193	14274.1	14787	-0.050925	0.76866	1	FALSE
ENSGALG00000003806	562.8	597.343	523.6	547.241	582.53	550.128	504.325	558.704	548.446	538.08	607.842	492.108	16215.6	17685	-0.12514	0.45764	0.88252	FALSE
ENSGALG00000003878	657.811	716.535	891.078	813.72	738.722	738.055	484.828	563.238	672.704	588.582	590.382	543.509	4395.96	6144.26	-0.48306	0.0029335	0.086597	FALSE
ENSGALG00000003966	597.294	548.237	748.488	886.082	707.101	773.321	571.613	661.414	693.502	686.89	606.144	530.565	8066.94	9679.75	-0.26295	0.11151	0.51844	FALSE
ENSGALG00000004167	659.203	444.331	982.125	634.566	469.144	801.847	275.019	415.142	680.508	686.48	310.37	398.26	4456.67	6810.83	-0.61187	0.054854	0.37736	FALSE
ENSGALG00000004184	781.66	852.961	707.646	888.641	669.637	1042.12	1188.87	929.709	1213.49	1085.8	1091.75	1428.12	29242.7	22069.3	0.40603	0.015342	0.20963	FALSE
ENSGALG00000004243	3134.77	3920.12	2201.67	2135.72	2308.76	3183.29	2676.68	2054.17	3495.8	3863.29	4081.24	3017.42	26983.1	25038.6	0.1079	0.59223	0.95665	FALSE
ENSGALG00000004262	692.315	927.336	852.782	883.106	1416.08	1058.87	786.171	741.738	829.55	1356.25	1051.13	790.509	17395.1	19154.3	-0.13899	0.46216	0.88586	FALSE
ENSGALG00000004509	2716.31	2944.84	3104.78	3095.62	2695.14	3454.06	2058.09	2512.4	2521.93	2232.65	3484.8	2727.99	49223.7	60259.6	-0.29184	0.052056	0.36646	FALSE
ENSGALG00000004521	962.294	1330.91	1088.68	1071.43	862.259	1373.07	1223.66	1173.69	1203.91	1217.03	1376.01	1487.49	23076.9	21251.9	0.11886	0.48441	0.90038	FALSE
ENSGALG00000004588	645.321	630.761	763.565	777.432	689.716	737.295	523.304	665.437	757.061	729.162	691.461	568.694	17533.7	19947.6	-0.18608	0.26315	0.73093	FALSE
ENSGALG00000004594	4122.95	2840.85	3446.23	2673.25	3106.88	3274.97	2954.52	3185.68	4120.93	3170.64	3676.76	2788.19	84086.9	86907.7	-0.047603	0.79151	1	FALSE
ENSGALG00000004818	549.858	503.955	615.782	648.888	545.849	607.826	517.925	609.306	710.575	679.814	606.59	559.818	18388.1	18298.8	0.0070287	0.93323	1	FALSE
ENSGALG00000004831	1009.25	922.939	1266.61	1281.6	1078.64	1208.8	913.89	1042.04	1227.88	1120.27	1084.66	873.659	22291.7	25462	-0.19184	0.24641	0.71348	FALSE
ENSGALG00000004848	1189.79	1272.94	1023.19	1106.87	1033.14	1223.39	888.654	1150.45	1206.25	1118.75	1148.9	991.802	24977.5	27694.2	-0.14896	0.39646	0.84423	FALSE
ENSGALG00000004871	1024.15	1193.99	1052.5	1400.69	1355.58	1083.33	941.677	1201.61	1230.81	1167.1	1225.56	992.266	16996.1	18799.6	-0.1455	0.38353	0.83524	FALSE
ENSGALG00000004952	1619.87	1431.42	1922.29	2177.09	1770.9	1892.79	1237.88	1776.06	1902.95	1842.78	1682.94	1483.79	11382.8	13074.3	-0.19988	0.22354	0.68612	FALSE
ENSGALG00000005490	1464.55	1419.43	1804.28	1975.81	1789.86	2185.76	1234.72	1807.88	1747.31	1783.15	1364	1332.42	25452.7	30771.4	-0.27377	0.099785	0.49347	FALSE
ENSGALG00000005749	610.62	624.062	688.418	739.038	666.996	693.84	433.129	611.581	644.911	611.546	603.285	458.773	7761.68	9778.34	-0.33322	0.045679	0.34509	FALSE
ENSGALG00000005948	1281.03	1388.9	1547.75	1585.84	1402.01	1655.87	931.621	1366.19	1510.43	1434.17	1383.31	1150.48	14190.6	17037.7	-0.2638	0.10777	0.51014	FALSE
ENSGALG00000006096	567.13	495.528	677.061	779.25	612.444	657.482	581.664	685.761	759.11	687.449	626.457	543.552	5668.78	5841.96	-0.043415	0.83716	1	FALSE
ENSGALG00000006175	2790.44	3058.15	2912.46	1884.01	2857.32	2037.4	2032.82	2291.15	2145.32	2426.93	2392.68	1764.28	53812.2	67421.2	-0.32527	0.058404	0.38829	FALSE
ENSGALG00000006179	1594.01	1480.13	1929.4	1860.94	1625.6	1834.54	1133.45	1511.16	1770.27	1707.77	1584.17	1295.42	24294.6	29399.5	-0.27516	0.093359	0.47912	FALSE
ENSGALG00000006322	846.845	932.293	711.072	735.625	970.015	510.257	553.732	650.024	577.069	505.6	1122.42	363.154	31144.5	40817.5	-0.39021	0.12716	0.54946	FALSE
ENSGALG00000006899	681.683	633.004	691.958	649.118	546.151	808.559	493.866	664.582	699.403	606.366	599.095	491.146	6323.8	7531.19	-0.25209	0.14427	0.57884	FALSE
ENSGALG00000007114	870.216	795.097	2035.12	3249.74	1630.42	766.446	1693.72	1990.43	1376.56	2022.03	1183.75	796.969	29058.3	31703	-0.12567	0.87201	1	FALSE
ENSGALG00000007205	1036.7	999.304	1068.65	1103.36	933.241	1311.82	1098.56	1141.94	1125.98	1112.6	1102.74	766.711	9964.74	10708	-0.10379	0.60445	0.96515	FALSE
ENSGALG00000007220	4057.47	4197.38	4762.2	4511.36	3843.86	4577.27	3246.47	4227.42	4112.06	4341.9	4352.27	3772.54	61497.4	70004.9	-0.18693	0.26147	0.72977	FALSE
ENSGALG00000007526	2824.57	1541.82	1172.03	1243.35	1209.99	2259.44	928.896	1838.02	2150.24	722.658	1172.57	840.592	26798.5	37766.3	-0.49495	0.211	0.67129	FALSE
ENSGALG00000007650	639.855	596.693	788.161	658.063	819.38	651.718	541.137	531.025	585.391	668.771	633.093	560.657	18706.9	23290.9	-0.3162	0.042556	0.33373	FALSE
ENSGALG00000007699	1468.79	1418.51	1526.64	1795.64	1557.5	1843.85	1133.21	1480.63	1770.57	1583.57	1494.44	1178.25	17916.2	21005.3	-0.22949	0.16663	0.61074	FALSE
ENSGALG00000007711	763.802	652.171	874.796	1000.42	776.857	854.522	689.66	897.032	929.264	901.785	789.8	754.657	24788.9	25954.8	-0.066306	0.71694	1	FALSE
ENSGALG00000007863	602.213	611.179	553.212	637.048	603.698	727.305	529.819	662.4	672.043	582.754	597.481	493.1	4966.88	5524.93	-0.15362	0.38228	0.83444	FALSE
ENSGALG00000007926	532.381	596.799	494.37	540.654	516.063	594.578	411.003	521.099	549.419	574.449	497.546	415.794	6245.09	7249.44	-0.21515	0.22277	0.68532	FALSE
ENSGALG00000008590	533.358	500.83	667.042	775.798	677.488	593.333	496.749	597.208	641.78	619.502	582.344	513.173	13752.3	15755.6	-0.19619	0.22737	0.69126	FALSE
ENSGALG00000008620	1544.86	1368.68	1856.53	2293.52	1657.27	1711.82	1097.91	1438.21	1607.53	1628.93	1395.11	1172.36	11795	15569.4	-0.40054	0.017147	0.22078	FALSE
ENSGALG00000008667	910.755	875.09	867.958	853.296	867.308	964.21	738.468	815.198	898.567	873.07	815.837	799.464	27375.3	31203.3	-0.18882	0.24627	0.71333	FALSE
ENSGALG00000008684	753.593	842.899	852.98	933.495	1000.94	894.25	722.293	830.97	872.924	837.668	885.455	738.931	24187.6	27508.1	-0.18559	0.24304	0.70945	FALSE
ENSGALG00000008806	1320.97	1079.78	1510.76	1919.41	1639.21	1568.6	1092.61	1291.01	1547.52	1431.64	1255.78	1075.68	13247.4	16418.3	-0.3096	0.054915	0.37736	FALSE
ENSGALG00000008969	516.865	489.186	505.017	558.152	700.534	453.574	512.435	529.621	541.417	527.671	609.831	510.896	28264	29669.7	-0.070024	0.6171	0.97095	FALSE
ENSGALG00000009621	3808.29	3291.6	3342.63	3242.18	2745.4	3747.07	3682.82	3052.58	3959.41	3445.84	3214.64	4251.88	106387	105263	0.015321	0.96308	1	FALSE
ENSGALG00000010023	1150.64	1186.06	1128.74	1262.98	1312.74	1147.59	980.522	1015.73	1051.07	1062.66	1038.78	953.516	24088.9	29911.7	-0.31234	0.053735	0.37283	FALSE
ENSGALG00000010077	2044.2	1985.11	2254.8	2384.39	2337.08	2105.53	1757.36	2118.63	2481.87	2365.93	2195.76	1762.11	37667.3	41039.5	-0.1237	0.47178	0.89261	FALSE
ENSGALG00000010124	2446.48	2636.73	2591.11	3021.74	2542.79	2715.4	1886.9	2442.23	2798.7	2497.92	2379.27	1959.37	33680.2	40551.2	-0.26784	0.11334	0.52116	FALSE
ENSGALG00000010243	633.509	809.849	703.453	325.311	728.633	650.653	574.655	653.294	652.338	482.364	639.792	499.789	9325.82	10797	-0.21133	0.26834	0.73536	FALSE
ENSGALG00000010343	2422.4	2179.46	2442.25	1699.7	1891.45	2896.48	2473.81	2609.88	2551.74	2448.56	2811.77	2154.17	59846.8	56910.7	0.072574	0.61735	0.97124	FALSE
ENSGALG00000010473	591.033	434.077	637.837	682.293	734.951	640.221	485.741	429.406	508.626	479.675	612.818	481.189	7925.69	10398.7	-0.3918	0.0093521	0.16085	FALSE
ENSGALG00000010825	1341.49	1337.31	713.305	580.286	577.79	1069.63	858.557	935.024	1374.8	1519.3	999.955	822.124	16272.7	14788.7	0.13796	0.50258	0.91145	FALSE
ENSGALG00000010996	908.353	1185.75	1010.03	789.365	904.181	847.301	686.181	911.802	944.6	898.16	946.699	835.392	7752.88	8818.88	-0.18586	0.28681	0.75471	FALSE
ENSGALG00000011290	748.339	630.28	912.226	933.22	739.029	805.696	633.096	705.777	842.151	805.162	691.72	562.198	17414.2	20708.9	-0.24998	0.14117	0.57356	FALSE
ENSGALG00000011306	2416	2184.47	2738.2	2915.35	1584.16	2987.14	3573.73	2352.77	2340.18	2276.75	2380.46	4741.83	75682.6	67707	0.16066	0.61578	0.97028	FALSE
ENSGALG00000011472	3133.88	2811.51	4371.79	4129.07	3280.52	4301.53	2613.33	3573.42	4122.06	3378.4	3004.4	2874.04	23169	27572	-0.25101	0.14952	0.58756	FALSE
ENSGALG00000011511	423.002	517.245	552.444	505.756	443.494	618.397	620.099	480.139	556.216	434.5	503.202	592.503	12383.3	12622.2	-0.027566	0.81567	1	FALSE
ENSGALG00000011740	745.021	929.666	874.198	1362.82	1051.96	1318.74	730.241	1267.46	1181.57	1335.93	1279.97	1439.33	14627.2	13352.1	0.13158	0.57679	0.9496	FALSE
ENSGALG00000011806	1011.85	752.584	923.978	708.439	713.803	796.495	751.747	660.426	628.861	519.538	783.139	518.065	17616.5	23732.1	-0.42991	0.0089597	0.15735	FALSE
ENSGALG00000011902	5054.66	4710.89	5800.69	5508.47	3529.78	5561.88	5022.54	3733.93	3982.11	3774.92	4411.34	7599.7	102417	115208	-0.16979	0.31302	0.77725	FALSE
ENSGALG00000011986	410.03	428.712	621.465	741.222	1108.13	433.895	453.33	420.781	370.831	566.385	421.215	378.411	3062.59	4607.48	-0.58923	0.047895	0.35351	FALSE
ENSGALG00000012112	780.737	683.135	716.961	673.563	972.214	764.695	506.831	857.317	794.703	542.705	827.352	518.595	6947.31	8267.33	-0.25097	0.13163	0.55787	FALSE
ENSGALG00000012172	1032.83	971.624	1254.9	1282.12	1151.97	1189.11	930.985	1161.93	1190.63	1199.27	1081.37	916.026	22823.1	25572.7	-0.16411	0.33681	0.79879	FALSE
ENSGALG00000012173	2227.94	2184.5	1864.96	1642.44	2110.83	1915.38	1713.03	2239.68	1910.48	2431.4	2590.37	2359.48	32659.9	30959.4	0.077142	0.64944	0.98604	FALSE
ENSGALG00000012229	2916.36	2540.44	3096.93	3369.1	2883.32	3396.12	2466.94	3082.13	3362.14	3227.46	2990.63	2536.29	18517.6	20133.2	-0.12068	0.47953	0.89691	FALSE
ENSGALG00000013990	1832.04	1680.02	2345.76	2586.94	1969.28	2162.75	1822.44	2238.32	2047.72	2112.11	2226.92	2042.97	21251	22609.2	-0.089377	0.57204	0.94894	FALSE
ENSGALG00000014121	528.169	493.651	629.066	588.843	545.739	570.233	448.242	569.051	618.057	511.584	502.926	448.604	5563.64	6360.33	-0.19307	0.25931	0.72764	FALSE
ENSGALG00000014176	5124.41	8242.15	3523.27	4855.56	2258.93	4780.72	8656.9	9116.42	6873.3	11065	7524.47	6695.25	62610.3	38022.5	0.71955	0.0011672	0.051415	FALSE
ENSGALG00000014432	1592.32	1425.38	1956.43	2183.27	1766.17	1906.48	1428.55	1719.5	1884.95	1903.13	1795.6	1425.06	14741.1	16597	-0.17108	0.30094	0.76806	FALSE
ENSGALG00000014442	1805.29	1829.87	1610.07	1893.13	1633.38	1924.8	1208.78	1462.65	1609.21	1632.41	1603.09	1388.55	32137.5	40683.6	-0.34019	0.036828	0.31113	FALSE
ENSGALG00000014833	865.756	671.759	1027.54	1106.78	1005.68	799.373	453.813	903.987	949.556	919.861	691.987	520.114	14070.6	18235.4	-0.37406	0.09178	0.47733	FALSE
ENSGALG00000015082	2162.87	1064.14	2357.99	2428.19	2122.01	1319.57	929.104	2228.54	2443.92	2449.59	1196.55	1040.81	29991.2	35050.7	-0.2249	0.56812	0.94773	FALSE
ENSGALG00000015195	2277.26	2449.08	2875.3	2934.44	2400.22	2837.33	1541.77	2269.56	2472.43	2422.46	2224.08	1906.81	19114.6	24759.2	-0.37329	0.023215	0.25328	FALSE
ENSGALG00000015339	714.193	730.26	855.208	957.936	825.732	897.649	669.549	822.502	900.792	890.962	796.704	659.86	12101.3	13411.3	-0.14829	0.38798	0.8379	FALSE
ENSGALG00000015372	578.345	318.339	660.366	691.439	644.522	402.666	326.868	716.892	671.327	682.909	335.618	295.839	3633.95	4147.32	-0.19064	0.63367	0.97921	FALSE
ENSGALG00000015617	3211.12	1446.28	3819.79	4134.15	3260.1	1842.33	1452.14	3396.83	3950.2	3548.83	1703.23	1460.9	20165.9	24203.5	-0.26329	0.54138	0.93244	FALSE
ENSGALG00000015704	787.636	653.032	682.322	873.391	859.167	555.57	389.413	827.534	824.097	848.501	451.922	448.117	8580.71	10450.6	-0.28442	0.28788	0.75504	FALSE
ENSGALG00000015917	4644.25	4541.95	5070.75	5251.4	4879.33	5120.27	3951.66	4771.22	5246.28	5383.59	4858.23	3934.07	117256	129617	-0.1446	0.40309	0.84907	FALSE
ENSGALG00000015937	1130.51	845.62	1686.9	1366.67	2065.64	512.842	1523.53	1804.67	795.781	1558.58	981.729	847.035	11642.6	12382.3	-0.088869	0.87305	1	FALSE
ENSGALG00000016232	956.862	878.59	1275.49	1228.53	1058.67	1104.42	806.588	1012.65	1146.17	1116.3	986.096	802.617	24860.8	29078.1	-0.22606	0.17891	0.62977	FALSE
ENSGALG00000016348	1424.15	1609.06	1461.13	2196.02	2493.57	1377.65	2031.73	2158.8	1587.12	1977.91	2267.73	1286.26	36282.2	35586.7	0.027922	0.84093	1	FALSE
ENSGALG00000016691	1821.07	1790.67	1984.78	2213.73	2154.44	1698.88	1722.85	1960.77	1909.88	2064.79	1775.56	1449.81	34367.6	38803.8	-0.17515	0.32673	0.78826	FALSE
ENSGALG00000017299	1396.14	1159.33	1567.6	1676.25	1300.9	1484.24	1254.3	1400.75	1615.01	1572.1	1416.06	1241.17	15202.2	16232.2	-0.094578	0.59055	0.95542	FALSE
ENSGALG00000017330	1369.37	1263.3	1703.01	1647.32	1585.13	1665.12	1220.46	1448.7	1665.76	1619.23	1465.4	1194.56	17089.7	19332.9	-0.17793	0.28159	0.74913	FALSE
ENSGALG00000017380	821.712	802.622	797.614	820.52	761.7	896.428	611.28	753.278	842.772	767.275	784.932	654.973	7224.63	8457.14	-0.22725	0.17163	0.61786	FALSE
ENSGALG00000017644	537.908	440.76	541.234	661.997	526.52	538.371	334.237	458.111	450.014	466.164	472.13	366.53	13706.9	18415.4	-0.42601	0.0089404	0.15735	FALSE
ENSGALG00000019716	864.099	940.786	667.703	441.481	679.502	628.908	797.847	935.695	1058.94	1143.59	984.554	1217.85	35789.7	25884.4	0.46746	0.0042219	0.10627	FALSE
ENSGALG00000020193	888.341	844.922	1018.66	586.761	683.165	885.4	692.262	691.868	1096.95	1078.27	1041.81	848.609	8524.72	8119.21	0.070313	0.69444	1	FALSE
ENSGALG00000021139	3324.93	1831.44	3339.68	1221.08	1033.23	2429.97	2935.56	2673.96	2083.93	1033.66	972.614	1889.94	31889	38747.6	-0.28105	0.53922	0.93077	FALSE
ENSGALG00000021627	1729.13	1398.19	2502.35	1178.67	502.876	1532.38	624.507	1478.7	713.722	775.673	1296.7	1443.46	9157.98	13555.4	-0.56577	0.14283	0.57635	FALSE
ENSGALG00000021910	3905.8	3458.52	4711.82	5163.42	6423.67	3771.55	3192.4	4153.56	4210.93	3908.39	4117.69	3000.45	4655.65	5943.26	-0.35227	0.040869	0.32671	FALSE
ENSGALG00000022557	890.819	874.522	815.419	662.506	680.941	767.088	608.935	843.234	772.487	826.851	1004.53	752.105	24311.5	24985.2	-0.039432	0.84769	1	FALSE
ENSGALG00000023294	1432.14	1116.81	1636.82	1486.93	1152.14	1469.27	1139.82	1113.11	1293.89	1088.09	1148.94	1111.48	20287.8	25876	-0.351	0.02918	0.28064	FALSE
ENSGALG00000024398	2139.46	1556.96	2580.47	2842.17	2088.93	2198.41	1595.35	1860.02	2192.48	1956.86	1865.97	1646.49	12298.3	15689	-0.35129	0.031857	0.29022	FALSE
ENSGALG00000025842	843.58	439.715	764.378	884.296	644.35	647.326	588.27	783.963	766.332	701.591	575.644	729.585	40767.7	43884.6	-0.10629	0.56137	0.9445	FALSE
ENSGALG00000026077	1014.16	974.004	860.183	729.73	589.669	1056.69	709.188	750.987	917.361	689.665	741.848	957.364	20932	24280.8	-0.21411	0.17661	0.62644	FALSE
ENSGALG00000026137	1046.65	512.445	861.849	1051.14	1109.66	394.029	203.677	648.303	375.788	755.668	527.712	582.383	17332.8	29096.7	-0.74735	0.022139	0.2503	FALSE
ENSGALG00000026383	1662.68	1805.11	1927.93	1506.71	1285.63	2358.2	1240.53	1811.62	1822.4	1807.76	1591.78	1510.61	20367.9	23169.2	-0.18591	0.32111	0.78382	FALSE
ENSGALG00000026490	1189.89	1128.51	1416.94	1345.39	1312.89	1534.67	851.114	1091.39	1239.2	1410.69	1346.48	1043.64	18001.1	21550.4	-0.25963	0.098453	0.4909	FALSE
ENSGALG00000026970	1055.72	737.214	636.226	531.031	396.824	847.542	637.441	552.711	771.245	696.002	728.017	861.24	8985.41	9428.32	-0.069417	0.73272	1	FALSE
ENSGALG00000026978	483.273	485.232	628.737	680.674	631.195	653.998	393.726	512.692	529.211	567.773	549.797	395.826	9748.83	12414.2	-0.34869	0.031325	0.2889	FALSE
ENSGALG00000027035	931.909	1058.43	1159.93	1334.4	1201.97	1247.59	744.234	1057.12	1120.97	1120.68	992.059	877.273	18248.5	22530.4	-0.3041	0.062829	0.39989	FALSE
ENSGALG00000027142	870.354	857.694	1009.53	1057.07	897.597	1051.6	718.356	915.91	1030.61	987.565	851.511	686.453	11481.2	13403.2	-0.22332	0.19718	0.65625	FALSE
ENSGALG00000027151	599.538	500.973	509.116	539.135	493.23	568.333	471.464	567.206	552.936	528.444	548.298	509.614	13634.8	14528.5	-0.091596	0.59333	0.95764	FALSE
ENSGALG00000027269	4343.97	5088.46	6427.13	6519.69	6372.53	5150.19	3920.12	4937.37	4718.02	4723.28	5356.15	4641.48	111625	140978	-0.3368	0.031596	0.28925	FALSE
ENSGALG00000027501	4305.17	3735.39	5837.99	4838.75	4791.87	4058.12	4092.62	3247.63	3021.88	3484.19	3449.77	2566.08	226218	332953	-0.55761	0.00067903	0.03709	DOWN
ENSGALG00000028145	459.634	487.988	696.087	656.965	616.105	557.874	244.257	357.626	354.003	385.142	406.734	253.933	3612.75	6607.66	-0.87104	2.914e-07	0.00025774	DOWN
ENSGALG00000028204	745.563	613.193	983.798	526.329	564.612	656.645	501.11	720.247	522.963	487.801	599.878	601.136	6737	8488.16	-0.33334	0.1125	0.51968	FALSE
ENSGALG00000028451	730.821	473.62	2803.15	1277.88	1084.59	891.397	498.372	442.88	330.763	615.199	642.041	449.393	3396.42	8849.25	-1.3815	0.029924	0.28388	FALSE
ENSGALG00000028567	1893.36	1796.64	2509.26	2672.98	1374.96	2138.12	2680.56	1751.57	1828.33	1957.38	1851.26	3285.94	41961.6	41489.5	0.016325	0.96977	1	FALSE
ENSGALG00000028600	1726.81	1635.4	1709.18	1588.55	1306.51	1883.56	1670.6	2078.92	2075.79	1801.43	1847.57	1825.46	24541.9	22598.7	0.11901	0.41266	0.85524	FALSE
ENSGALG00000028749	3019.22	2156.44	3027.69	3012.49	2123.75	2853.37	2353.55	2444.48	3117.7	2688.82	3102.53	2526.32	86442.2	91361.2	-0.079845	0.61098	0.96794	FALSE
ENSGALG00000028774	915.302	1124.89	987.56	902.545	1042.69	1065.25	803.868	872.219	950.133	854.512	899.506	1105.67	5482.21	6361.58	-0.21463	0.15493	0.59668	FALSE
ENSGALG00000028810	940.321	1272.32	965.187	828.252	693.238	1183.81	1011.13	1089.07	1043.84	1096.08	748.378	616.447	3561.22	3946.5	-0.1482	0.62699	0.97658	FALSE
ENSGALG00000028872	1378.37	1337.02	1971.18	2027.47	1825.01	1657.78	1384.47	1612.59	1639.62	1752.58	1444.09	1233.69	23220.5	27564.8	-0.24743	0.14071	0.57353	FALSE
ENSGALG00000029367	694.02	547.016	545.645	502.077	483.49	550.625	528.668	514.232	558.363	592.335	488.686	433.433	5054.04	5694.08	-0.17203	0.35697	0.81526	FALSE
ENSGALG00000029500	965.216	881.274	746.87	733.65	800.112	876.335	962.469	997.636	758.044	833.648	666.12	1002.63	27887.3	28192.5	-0.015704	0.96752	1	FALSE
ENSGALG00000029687	455.368	650.699	623.477	791.928	684.679	573.337	285.701	398.962	431.947	431.409	464.82	407.566	15604.4	25635.2	-0.71617	7.1416e-06	0.0022079	DOWN
ENSGALG00000029837	1876.04	1735.28	1939.29	1961.75	1547.25	2476.1	1165.46	1688.25	1601.56	1672.68	1964.16	1544.15	8180.1	10332.6	-0.33702	0.03341	0.29814	FALSE
ENSGALG00000030108	477.267	534.564	558.114	613.16	467.894	546.317	270.922	494.797	459.302	581.086	524.209	352.326	6358.27	7967.4	-0.32547	0.070588	0.42173	FALSE
ENSGALG00000030378	1064.01	919.453	1253.1	1349.31	1199.7	1243.96	931.508	1152.23	1289.03	1201.35	1092.14	984.893	12375.2	13802.2	-0.15744	0.33561	0.79753	FALSE
ENSGALG00000030436	2773.98	1364.8	2344.78	2122.99	2034.21	2197.32	2423.86	2877.57	2529.25	2754.42	2112.87	2403.13	15602.6	14013.7	0.15495	0.30239	0.76914	FALSE
ENSGALG00000030878	2995.67	2753.6	3959.48	3625.88	3211.2	3427.86	2342.88	2988.36	3323.15	2924.03	3134.51	2614.59	21016.5	25592	-0.28417	0.077046	0.43931	FALSE
ENSGALG00000031038	1627.08	1522.71	2314.91	2502.96	1887.89	1802.55	1426.82	1625.25	1828.98	1554.37	2034.96	1790.34	14963.2	17988.9	-0.26569	0.079733	0.44907	FALSE
ENSGALG00000031099	1586.82	1581.94	1320.25	1554.3	1380.33	1751.29	1009.93	1297.02	1245.07	1308.25	1296.41	1111.89	10896.7	14485.3	-0.41069	0.012482	0.18834	FALSE
ENSGALG00000031723	1181.57	1182.17	1140.95	1098.2	1016.03	1280.69	879.771	899.391	1076.49	1074.45	1088.16	946.108	4786.3	5848.01	-0.28903	0.074891	0.4326	FALSE
ENSGALG00000032002	1407.63	1496.65	1954.78	2106.86	1807.25	1746.36	992.895	1450.86	1581.54	1596.36	1503.54	1214.49	11458.9	15229.2	-0.41037	0.011337	0.17897	FALSE
ENSGALG00000032052	2444.64	1897.79	2815.37	2811.39	2216.48	2526.47	1803.18	1995.59	2432.68	2190.83	1990.61	1774	14229.4	18173.9	-0.35299	0.03121	0.28859	FALSE
ENSGALG00000032079	3109.65	2475.09	2352.4	2164.81	2427.94	2708.49	3407.3	3711.02	2607.14	2575.52	1752.96	3009.37	57319.9	54013	0.08573	0.52437	0.92042	FALSE
ENSGALG00000032142	10794.7	19430.8	10279.4	6473.3	8306.12	13290.9	12136.6	16232.7	10374.3	8643.32	9142.24	12120.6	312868	328677	-0.071116	0.92507	1	FALSE
ENSGALG00000032247	632.008	642.468	502.989	474.208	506.092	572.146	598.147	560.67	536.309	676.47	601.158	534.291	33180.9	33231.8	-0.0022082	0.92623	1	FALSE
ENSGALG00000032456	9945.87	10031.6	8135.5	7978.66	8031.74	10736.2	9634.83	12638.9	9819.17	9314.64	8165.68	10892.5	121787	116380	0.065519	0.61187	0.96845	FALSE
ENSGALG00000032595	1096.22	1355.81	1079.49	1074.64	1006.15	1277.28	683.453	1097.78	1109.05	898.198	1076.57	844.869	8991.06	11411.2	-0.34389	0.040631	0.32597	FALSE
ENSGALG00000032598	601.43	607.851	597.41	651.559	596.825	493.045	631.746	604.153	575.212	634.24	584.391	653.273	31760.5	32305.4	-0.024541	0.90464	1	FALSE
ENSGALG00000032637	734.554	921.364	848.77	881.343	940.334	769.23	683.122	814.912	769.588	669.48	830.226	679.914	4604.65	5556.07	-0.27097	0.099812	0.4935	FALSE
ENSGALG00000032875	919.278	741.327	1010.25	1115.9	893.154	866.064	638.578	665.061	723.208	850.503	659.844	672.948	5832.91	8119.07	-0.4771	0.0034089	0.095019	FALSE
ENSGALG00000033001	589.179	638.879	505.456	519.978	507.303	619.401	417.719	536.914	594.982	534.82	545.339	470.122	4362.82	5009.59	-0.19943	0.2473	0.71417	FALSE
ENSGALG00000033033	444.574	523.561	1340.35	1013.51	1290.86	580.874	1056.15	1002.43	350.361	651.505	996.608	335.114	30243.1	37839.3	-0.32328	0.43609	0.86915	FALSE
ENSGALG00000033446	1494.82	1331.61	1144.11	1024.94	795.44	1306.3	1070.66	902.757	1120.18	1064.49	1027.6	927.178	5326.46	6550.95	-0.29853	0.083411	0.45757	FALSE
ENSGALG00000033447	937.913	1163.77	1004.96	892.27	941.713	1235.78	1017.26	1166.03	1174.92	1117.37	993.876	940.571	9522.97	9676.01	-0.023001	0.97772	1	FALSE
ENSGALG00000033530	1127.95	1461.1	1318.09	1579.23	1287.39	925.559	731.613	826.198	753.95	555.666	705.53	894.43	13269.9	24133.9	-0.8629	9.0065e-08	0.00011506	DOWN
ENSGALG00000033884	677.63	631.406	764.777	814.163	763.999	730.845	684.033	676.782	748.906	777.262	740.88	727.836	33406.5	35508	-0.088017	0.55712	0.9422	FALSE
ENSGALG00000033894	543.306	530.675	884.212	759.444	787.85	534.228	328.927	460.663	366.735	509.404	571.136	372.385	3808.66	6212.41	-0.70587	0.00075604	0.04006	DOWN
ENSGALG00000033932	2269.19	1632.08	2059.84	2505.4	2611.32	2146.69	1793.75	1188.15	1634.61	3502.78	3174.09	2843.53	48521.2	47874.4	0.019363	0.91132	1	FALSE
ENSGALG00000034177	863.243	1043.72	915.374	957.36	1023.77	1002.55	630.931	905.258	876.686	890.073	1011.1	813.688	9657.16	11494.6	-0.25128	0.11651	0.52618	FALSE
ENSGALG00000034811	955.81	770.96	1153.4	1184.88	935.732	1076.54	844.089	1048.77	1141.54	1016.28	915.075	781.089	10810.8	12082.6	-0.16046	0.3612	0.81852	FALSE
ENSGALG00000034868	1036.3	965.732	724.536	580.719	701.413	827.787	762.176	1019.03	1042.04	1133.86	1053.36	1372.68	47418.4	37799	0.3271	0.061974	0.39711	FALSE
ENSGALG00000035079	1339.25	1278.35	1523.81	1544.52	1329.74	1595.68	1165.33	1447.44	1515.49	1534.77	1358.75	1181.39	29881.3	33103	-0.14772	0.39473	0.84277	FALSE
ENSGALG00000035086	9434.53	8500.13	11362.1	9870.19	7962.74	12141.7	6487.2	8000.49	9332.26	8069.53	9965.2	12575.7	81173.9	93557.7	-0.20484	0.1717	0.61799	FALSE
ENSGALG00000035138	1111.51	880.433	1056.2	955.146	857.358	1185.53	1011.93	1016.53	1095.84	1075.66	1145.3	1024.06	4154.64	4173.15	-0.0064139	0.962	1	FALSE
ENSGALG00000035206	578.323	539.709	523.978	472.685	412.569	525.2	353.075	420.667	469.922	444.814	440.381	382.621	4102.03	5262.66	-0.35946	0.033013	0.29626	FALSE
ENSGALG00000035252	689.792	746.957	884.331	941.243	920.111	864.475	569.303	758.119	778.852	768.631	722.48	600.144	14654.6	18556.6	-0.34058	0.036854	0.31124	FALSE
ENSGALG00000035308	452.458	458.118	594.437	537.759	505.676	661.623	462.813	399.157	434.859	401.149	419.822	397.703	5349.28	7235.44	-0.43574	0.0062297	0.13139	FALSE
ENSGALG00000035334	9283.38	8398.93	8861.81	8400.21	7952.42	9976.95	8644.58	10980.5	9189.08	8302.97	7370.83	8957.51	123344	128734	-0.061701	0.7694	1	FALSE
ENSGALG00000035506	1338.73	1300.75	1582.39	1599.41	1493.82	1626.73	1060.82	1444.54	1522.81	1442.68	1429.39	1240.83	14271.1	16523.6	-0.21143	0.19078	0.64623	FALSE
ENSGALG00000035584	485.211	627.516	385.56	498.588	500.896	599.75	609.166	559.785	552.472	528.472	551.679	644.775	47383	44912.3	0.077259	0.64057	0.98308	FALSE
ENSGALG00000035677	610.152	534.588	727.046	785.572	663.983	661.44	500.395	632.79	712.025	700.018	622.739	525.273	12954.7	14740.4	-0.18631	0.26599	0.73324	FALSE
ENSGALG00000035996	1005.02	1019.74	926.065	942.935	941.345	1136.62	748.66	1006.4	935.779	866.38	966.113	703.311	7975.07	9595.06	-0.26679	0.11768	0.52825	FALSE
ENSGALG00000036086	1475.14	1447.28	1414.25	1224.65	980.738	1883.62	1805.94	1305.68	1118.54	1562.17	1352.11	1755.27	19138.8	19237.6	-0.0074254	0.94372	1	FALSE
ENSGALG00000036089	671.955	698.349	1042.31	860.414	760.128	684.517	468.294	456.158	479.018	474.394	501.966	560.407	2668.38	4535.57	-0.76532	1.8045e-06	0.00090211	DOWN
ENSGALG00000036099	797.64	799.55	1021.2	1117.01	958.874	928.091	687.254	900.775	958.957	971.51	899.571	766.504	9851.49	11264.4	-0.19336	0.24141	0.70739	FALSE
ENSGALG00000036229	1360.86	1079.62	1072.13	929.972	1058.21	1136.63	1449.06	1629.5	1179.27	1188.81	772.846	1232.07	30194.7	28369.6	0.089951	0.47601	0.89467	FALSE
ENSGALG00000036774	1806.11	923.291	2141.66	2320.36	1972.35	1176.49	843.562	2026.15	2163.59	2178.36	1178.86	988.554	17863.6	20675.5	-0.21089	0.58289	0.95099	FALSE
ENSGALG00000036790	1347.9	1268.35	1741.56	1796.88	1548.28	1672.35	1049.61	1309.25	1394.14	1440.48	1106.89	1023.72	14302.7	19320.8	-0.43386	0.0087759	0.15584	FALSE
ENSGALG00000037286	700.837	681.103	527.67	637.398	590.524	604.923	696.269	524.524	577.863	764.631	760.376	817.036	31323	29906.3	0.066775	0.74008	1	FALSE
ENSGALG00000037332	527.455	783.395	513.098	564.607	545.119	590.504	572.174	728.939	740.676	647.518	515.812	752.803	9250.7	8664.49	0.094448	0.49192	0.90454	FALSE
ENSGALG00000037441	2357.06	1857.18	2978.84	2868.57	2069.5	2353.02	1819.76	1973.24	2266.27	2240.39	1769.25	1553.86	8718.03	11504.2	-0.40009	0.020381	0.2413	FALSE
ENSGALG00000037716	1305.02	874.938	1754.74	1653.37	1176.56	1329.97	907.587	971.281	1022.2	936.389	997.554	867.08	8648.52	13022	-0.59042	0.0022622	0.073669	FALSE
ENSGALG00000037805	1646.94	1461.2	1916.57	2124.7	1525.35	1737.65	1391.48	1561.48	1707.03	1644.27	1406.61	1436.56	12377.6	14899.4	-0.26752	0.10873	0.51231	FALSE
ENSGALG00000037838	1226.7	897.748	900.058	802.49	735.229	1047.61	1063.57	1571.93	1125.88	1099.12	1016.99	1792.17	11798.3	9097.95	0.37496	0.076437	0.43758	FALSE
ENSGALG00000037953	1235.33	1547.82	1123.1	1238.63	919.157	1298.42	1489.62	1142.87	1300.86	1265.35	1251.1	1441.98	33832.7	33429.5	0.017294	0.86792	1	FALSE
ENSGALG00000038003	1112.18	947.255	1072.29	1016.06	1079.18	1047.85	861.043	1009.29	956.196	1031.92	1303.7	1045.46	18355.7	19565.3	-0.092073	0.51293	0.91748	FALSE
ENSGALG00000038589	952.812	1229.58	1070.7	1059.66	1010.42	1090.78	610.981	759.476	797.923	950.405	827.679	531.624	6399.67	9647.97	-0.59223	0.00045356	0.029164	DOWN
ENSGALG00000038593	533.385	1085.24	1508.24	1091.07	1045.77	1213.58	250.048	762.063	662.94	982.266	658.78	500.021	5297.88	9434.72	-0.83256	0.006575	0.1356	FALSE
ENSGALG00000038671	626.183	482.662	587.261	656.526	526.676	585.415	586.428	512.149	472.054	602.527	572.153	537.531	8490.8	9485.3	-0.15979	0.32223	0.78557	FALSE
ENSGALG00000038672	1194.24	1152.26	1252	1346.71	1090.25	1366.55	923.054	986.366	1014.71	961.731	901.262	803.996	5900.83	8256.8	-0.48467	0.0035308	0.09689	FALSE
ENSGALG00000038714	740.092	993.607	802.983	799.666	738.95	902.606	451.02	687.331	690.234	725.617	645.576	537.265	5313.76	7442.2	-0.486	0.0040146	0.10327	FALSE
ENSGALG00000038801	867.784	907.895	756.425	764.711	689.335	811.248	775.988	766.79	830.653	812.508	757.809	724.16	23615.6	25628.7	-0.11802	0.53081	0.92535	FALSE
ENSGALG00000038941	2137.41	3169.03	2895.26	2361.71	3089.66	2673.81	1408.74	1834.55	2584.21	2127.28	2215.84	2029.71	8189.18	11527.8	-0.49333	0.0018792	0.068253	FALSE
ENSGALG00000039212	613.063	691.932	680.965	657.765	615.608	713.315	492.098	609.567	660.389	555.939	557.229	533.234	5346.33	6572.77	-0.29795	0.074011	0.43001	FALSE
ENSGALG00000039470	3329.42	2972.39	3965.23	4144.31	3007.31	3496.46	2208.3	2870.49	3319.18	3253.89	2719.23	2396.44	35615.2	46921.5	-0.39776	0.017036	0.22078	FALSE
ENSGALG00000039474	555.968	942.585	626.156	854.812	565.46	609.452	643.705	591.731	673.659	933.094	872.147	662.904	9999.15	10009	-0.0014222	0.92218	1	FALSE
ENSGALG00000040180	600.152	788.941	663.728	744.411	666.082	570.072	492.168	539.119	532.075	531.792	567.173	444.002	6741.36	9225.78	-0.45263	0.0070652	0.14	FALSE
ENSGALG00000040238	465.07	619.991	688.832	499.136	465.373	580.76	209.237	337.546	347.301	390.08	401.969	290.09	2449.34	4335.09	-0.82367	3.691e-06	0.0013915	DOWN
ENSGALG00000040368	942.501	939.764	706.287	628.136	498.518	799.757	1092.63	1076.49	1175.13	1011.49	970.314	904.804	18261.6	13993.1	0.3841	0.0089524	0.15735	FALSE
ENSGALG00000040832	765.764	909.312	611.938	497.743	424.412	795.604	863.284	1026.72	1384.8	892.192	1080.72	836.126	52106.1	36216.4	0.52481	0.0055781	0.12388	FALSE
ENSGALG00000041063	595.434	683.728	597.323	551.868	537.337	560.746	462.477	520.471	572.226	509.161	507.2	553.732	5633.36	6705.08	-0.25126	0.12976	0.55513	FALSE
ENSGALG00000041091	5648.3	4914.87	4568.01	4232.75	4143.95	5534.93	6599.54	7018.03	5563.25	5365.61	4214.28	6119.37	70104.7	61664.9	0.18506	0.20068	0.65979	FALSE
ENSGALG00000041164	661.371	635.674	594.279	620.649	507.541	710.367	466.954	563.809	587.045	548.37	531.935	526.587	4811.32	5873.86	-0.28788	0.08445	0.45988	FALSE
ENSGALG00000041266	2267.5	1889.14	2315.17	2258.59	1310.31	2727.88	2558.3	1893.42	1915.47	1787.48	1914.31	3763.18	35597.3	34986.6	0.024962	0.95163	1	FALSE
ENSGALG00000041277	541.847	538.777	623.317	729.299	637.451	785.403	445.519	410.865	607.966	505.645	616.6	548.751	6802.48	8849.44	-0.37953	0.011338	0.17897	FALSE
ENSGALG00000041380	8535.62	5082.32	3257.42	3860.35	3520.67	4309.12	3151.87	2646.6	3096.99	2156.35	2533.81	1637.1	55796.2	110741	-0.98895	0.0054145	0.12207	FALSE
ENSGALG00000041392	709.909	627.433	554.254	577.453	793.897	567.967	677.476	780.534	770.46	703.803	971.113	648.26	43009	38051.8	0.17667	0.28069	0.74845	FALSE
ENSGALG00000041502	5562.47	4815.98	3507.6	3653.41	2858.52	5236.85	3416.86	7029.94	4373.13	3445.37	2930.6	3362.74	60019.1	65751	-0.13159	0.79436	1	FALSE
ENSGALG00000041611	570.262	353.503	802.912	551.095	299.162	627.187	287.866	437.424	589.3	385.88	347.371	301.212	2789.77	4041.86	-0.53488	0.09049	0.47423	FALSE
ENSGALG00000041634	3347.72	2295.33	3497.08	3064.3	2092.46	3738.66	3590.94	2608.52	2743.27	2179.94	2724.56	3883.88	68841.6	74622	-0.11632	0.45811	0.88292	FALSE
ENSGALG00000041812	536.184	521.116	525.796	495.807	467.027	564.207	399.635	497.82	488.73	498.835	513.483	400.617	6065.93	7107.31	-0.22857	0.18035	0.63252	FALSE
ENSGALG00000041826	2569.75	1718.28	3126.5	2301.68	2705.93	2432.16	1565.95	2223.56	1810.84	2343.59	2716.46	2397.06	15742.5	18886.2	-0.26268	0.10128	0.49747	FALSE
ENSGALG00000041926	475.368	561.402	681.341	635.98	482.374	579.382	453.706	516.107	468.613	515.218	432.507	448.535	7131.41	9086.63	-0.34956	0.038991	0.31936	FALSE
ENSGALG00000042008	649.048	448.063	608.942	631.757	522.945	608.326	342.323	661.021	636.934	279.219	402.587	389.319	4824.81	6503.99	-0.43085	0.057435	0.38583	FALSE
ENSGALG00000042059	646.639	473.94	469.481	484.816	654.377	471.235	483.176	500.566	348.394	247.581	351.471	354.432	4299.11	6346	-0.56181	0.00064574	0.035868	DOWN
ENSGALG00000042459	750.501	817.61	811.739	746.982	630.247	931.452	559.083	709.031	808.532	805.605	760.766	627.055	5017.76	5814.21	-0.21254	0.21397	0.67556	FALSE
ENSGALG00000042468	492.689	579.428	576.311	559.808	527.914	574.314	377.551	564.637	563.522	513.801	592.091	312.931	4501.52	5363.3	-0.25271	0.15892	0.60103	FALSE
ENSGALG00000042633	543.693	481.386	585.229	530.943	376.029	687.25	378.495	430.199	487.5	419.244	539.482	446.89	3090.28	3882.49	-0.32924	0.037881	0.31539	FALSE
ENSGALG00000042750	2129.98	2271.36	1526.04	1510.51	1700.18	1904.56	2107.39	2738.26	1976.72	2107.87	1478.53	2081.16	35872.1	33334.4	0.10585	0.3872	0.83766	FALSE
ENSGALG00000043379	1119.28	1351.67	1527.74	1827.66	1334.7	1470.35	988.733	1416.93	1144.82	1380.9	1261.83	1020.03	14785.8	18642.2	-0.33436	0.048682	0.35649	FALSE
ENSGALG00000043641	1965.11	2603.99	2690.65	1637.64	1178.81	1719.75	1467.88	1387.52	1291.18	1563.64	2096.96	1854	27581.2	35714.3	-0.37282	0.1128	0.52034	FALSE
ENSGALG00000043768	1281.12	1139.67	847.695	875.353	962.227	1080.96	1427.38	1354.14	1136.01	942.561	650.48	1123.68	20258.9	19950.4	0.022138	0.77044	1	FALSE
Novel00260	463.788	637.746	632.303	588.844	563.519	515.589	271.207	386.509	399.168	386.387	407.857	381.327	14038.9	22524.2	-0.68205	2.4206e-05	0.0048829	DOWN
Novel00273	557.437	527.89	542.781	595.094	563.598	612.556	447.778	593.525	537.137	560.54	576.698	461.499	3650.44	4113.29	-0.17222	0.31159	0.77536	FALSE
Novel00701	2138.74	1435.65	1563.63	761.139	593.546	1214.55	1144.35	1392.73	1015.11	1686.97	1905.87	1593.38	70628.5	65911.2	0.099727	0.70039	1	FALSE
Novel00731	378.391	727.762	552.23	505.087	537.431	494.126	223.99	436.361	318.788	440.185	387.046	405.526	1745.89	2642.06	-0.5977	0.002083	0.071282	FALSE
Novel01155	640.973	1456.54	1467.64	1332.92	1742.97	1125.47	313.804	882.816	538.962	947.014	827.873	630.003	2529.32	4949.55	-0.96855	0.00036139	0.025272	DOWN
Novel01221	555.986	961.302	998.579	877.421	889.745	1283.54	1163.76	789.682	1134.7	1320.98	1419.52	1775.49	15781.2	12241.2	0.36647	0.15086	0.59003	FALSE
Novel01522	2532.48	3001.46	2851.09	2189.64	2323.32	2565.02	2036.2	2278.45	2467.51	2652.28	3448.66	2574.13	22005.8	23229.2	-0.078052	0.60155	0.96289	FALSE
Novel01677	452.974	596.587	667.953	726.427	803.686	594.692	879.981	887.866	752.425	1041.19	790.281	727.289	11486.9	9151.99	0.32783	0.035378	0.30642	FALSE
Novel01690	3123.72	3023.14	3478.77	2910.73	2219.53	3274.56	2063.15	2266.11	2562.75	2391.65	2541.35	2710.24	15854.8	20820.3	-0.39307	0.013525	0.19485	FALSE
Novel01809	889.297	956.32	787.485	729.314	720.452	790.813	609.671	598.068	685.209	780.058	891.051	579.33	10206.3	12665.3	-0.31142	0.060698	0.39352	FALSE
Novel01877	982.633	876.549	915.32	1033.11	932.119	1054.21	947.789	898.867	937.858	1077.79	1052.1	960.269	15050.7	15680.6	-0.059152	0.69535	1	FALSE
Novel01922	1146.66	1361.09	1699.05	1546.99	479.227	389.348	561.045	729.72	580.319	860.654	698.902	327.628	12771.1	23838.7	-0.90042	0.055136	0.37826	FALSE

## Sheet: Table S4b
Supplement Table S4b highly abundant genes in group P
Gene_id	C1_fpkm	C2_fpkm	C3_fpkm	C4_fpkm	C5_fpkm	C6_fpkm	P1_fpkm	P2_fpkm	P3_fpkm	P4_fpkm	P5_fpkm	P6_fpkm	P_readcount(PvsC)	C_readcount(PvsC)	log2FoldChange(PvsC)	pval(PvsC)	padj(PvsC)	significant(PvsC)
ENSGALG00000000122	1438.19	1348.92	1676.09	1673.89	1428.41	1811.83	1214.37	1482.12	1771.33	1603.63	1455.12	1283.04	24039	27023.8	-0.16885	0.31107	0.77487	FALSE
ENSGALG00000000150	524.081	590.307	562.105	668.318	590.091	667.317	452.135	603.696	637.834	657.809	608.693	488.416	15628.9	17187.7	-0.13716	0.4283	0.86474	FALSE
ENSGALG00000000318	1585.32	1448.44	1754.49	1829.79	1093.52	1889.59	1681.04	1308.34	1356.25	1252.43	1339.95	1989.59	34050.2	38944.5	-0.19376	0.20057	0.65976	FALSE
ENSGALG00000000474	1525.92	1193.17	1574.95	1519.07	1391.78	1490.28	1008.76	1361.22	1705.32	1449.56	1408.94	1088.88	11154.3	12753.5	-0.19329	0.25088	0.71901	FALSE
ENSGALG00000000608	980.135	852.195	902.198	842.11	892.77	845.843	970.644	908.309	895.429	930.748	966.458	978.475	48340.7	48044.9	0.0088548	0.96407	1	FALSE
ENSGALG00000000812	1147.5	1110.23	1213.19	1094.92	1174.8	1063.63	778.094	1095.49	1056.18	1047.06	1205.13	865.228	14791.4	17519.6	-0.24421	0.13929	0.57119	FALSE
ENSGALG00000000919	972.687	656.514	355.088	283.531	585.397	680.729	473.309	1179.9	789.097	609.529	566.047	511.502	31630.4	28220.9	0.16455	0.54212	0.93294	FALSE
ENSGALG00000001445	1940.23	4348.84	928.13	1351.26	3290.62	5572.65	5449.86	2540.3	3709.14	4294.46	3068.48	4399.62	61636.6	48298.9	0.3518	0.36618	0.82243	FALSE
ENSGALG00000001465	703.543	693.08	815.463	869.27	782.592	901.558	625.144	846.421	820.864	756.688	761.358	613.897	6895.16	7829.42	-0.18332	0.28174	0.74914	FALSE
ENSGALG00000001634	2183.67	2157.97	3188.28	3128.73	2584.74	2783.78	1907.68	2709.54	2982.22	2936.49	2635.01	2064.61	18505.2	20540.9	-0.15056	0.39266	0.84153	FALSE
ENSGALG00000001658	1596.74	1387.41	1881.42	2076.12	1607.25	1899.03	1443.12	1812.25	1853.31	1785.92	1601.93	1515.41	17628.8	19430.2	-0.14036	0.40799	0.85355	FALSE
ENSGALG00000001926	663.456	553.774	660.152	643.981	349.268	740.83	709.291	541.019	578.285	426.352	557.271	1301.77	9043.79	8455.94	0.096962	0.90197	1	FALSE
ENSGALG00000001992	564.507	603.347	443.903	428.809	321.565	577.598	542.124	597.506	593.253	622.182	507.755	579.903	22166.4	19987.6	0.14927	0.27611	0.74297	FALSE
ENSGALG00000002157	2278.79	2050.33	3092.02	3199.56	2467.7	2834.02	2021.78	2338.81	2536.2	2516.64	2345.63	1910.1	18825.2	23188.8	-0.30076	0.067389	0.41521	FALSE
ENSGALG00000002160	5046.33	5027.4	4853.1	5925.53	5710.31	5943.95	4659.25	4637.4	4810.4	5203.69	5674.5	4946.84	94731.4	108532	-0.1962	0.19541	0.6541	FALSE
ENSGALG00000002210	1536.25	1416.17	1260.69	1295.98	1040.33	1489.11	1266.73	1331.8	1595.86	1405.38	1213.14	1258.8	16204.4	17053.2	-0.073658	0.72974	1	FALSE
ENSGALG00000002286	496.31	481.297	616.912	633.696	640.05	585.204	521.423	550.891	590.035	615.747	634.498	542.365	11601	12238.9	-0.077226	0.59486	0.95821	FALSE
ENSGALG00000002377	1167.5	1083.16	1133.9	1281.53	1217.14	1162.98	859.751	1127.66	1084.17	1102.02	1206.24	931.811	26547.4	31207.8	-0.23333	0.15194	0.5918	FALSE
ENSGALG00000002495	1043.23	1000.37	1061.63	930.635	876.945	1053.57	717.471	851.713	875.882	820.944	799.183	646.96	12050.2	16105.6	-0.4185	0.013047	0.19269	FALSE
ENSGALG00000002644	960.47	842.681	1175.5	1252.35	1086.93	1092.98	783.73	1047.35	1171.94	1122.7	975.516	838.525	12303.1	14004.9	-0.18691	0.26526	0.73288	FALSE
ENSGALG00000002771	3124.32	3772.97	4372.33	2686.65	3481.63	3567.5	3778.45	3601.72	4283.1	4100.55	4536.05	5147.1	59036.4	51530.6	0.19617	0.26854	0.73569	FALSE
ENSGALG00000002813	2115.61	1852.39	2567.22	2414.88	2149.86	2424.67	1783.64	2222.23	2566.72	2402.35	2115.13	1786.01	21193.8	23506.9	-0.14944	0.38595	0.83642	FALSE
ENSGALG00000002837	1779.66	1512.12	2237	2359.43	1869.32	2107.64	1633.45	1911.61	2106.13	2056.46	1839.26	1539.78	17521.6	19820.3	-0.17784	0.29239	0.75985	FALSE
ENSGALG00000002868	755.463	864.666	948.827	1014.52	870.801	936.478	605.849	834.462	888.777	855.815	826.133	671.701	14668.5	17795.1	-0.27876	0.094395	0.48131	FALSE
ENSGALG00000002932	881.536	906.001	948.708	1014.66	862.616	1131.57	763.487	881.339	1100.29	1137.98	802.953	711.302	12061.2	13545	-0.16738	0.35793	0.81615	FALSE
ENSGALG00000003197	1118.99	1222.37	1247.74	1459.16	1280.52	1357.61	937.68	1094.88	1250.91	1243.73	1107.77	976.87	17396.8	21322.6	-0.29356	0.074064	0.4301	FALSE
ENSGALG00000003213	2131.79	2619.2	1482.96	1629.97	1964.64	2571.22	1317.72	2002.51	1865.15	1985.42	1476.37	1430.11	18406.1	23743.6	-0.36736	0.064247	0.40422	FALSE
ENSGALG00000003521	1376.94	1319.29	1291.77	1311.91	1124.53	1394.98	1693.07	1163.3	1298.52	1147.34	1261.57	1811.37	30725.9	30451	0.012965	0.97595	1	FALSE
ENSGALG00000003770	578.036	622.534	552.582	517.874	513.239	596.277	463.493	596.229	570.117	599.846	607.777	600.193	14274.1	14787	-0.050925	0.76866	1	FALSE
ENSGALG00000003806	562.8	597.343	523.6	547.241	582.53	550.128	504.325	558.704	548.446	538.08	607.842	492.108	16215.6	17685	-0.12514	0.45764	0.88252	FALSE
ENSGALG00000003878	657.811	716.535	891.078	813.72	738.722	738.055	484.828	563.238	672.704	588.582	590.382	543.509	4395.96	6144.26	-0.48306	0.0029335	0.086597	FALSE
ENSGALG00000003966	597.294	548.237	748.488	886.082	707.101	773.321	571.613	661.414	693.502	686.89	606.144	530.565	8066.94	9679.75	-0.26295	0.11151	0.51844	FALSE
ENSGALG00000004184	781.66	852.961	707.646	888.641	669.637	1042.12	1188.87	929.709	1213.49	1085.8	1091.75	1428.12	29242.7	22069.3	0.40603	0.015342	0.20963	FALSE
ENSGALG00000004243	3134.77	3920.12	2201.67	2135.72	2308.76	3183.29	2676.68	2054.17	3495.8	3863.29	4081.24	3017.42	26983.1	25038.6	0.1079	0.59223	0.95665	FALSE
ENSGALG00000004262	692.315	927.336	852.782	883.106	1416.08	1058.87	786.171	741.738	829.55	1356.25	1051.13	790.509	17395.1	19154.3	-0.13899	0.46216	0.88586	FALSE
ENSGALG00000004509	2716.31	2944.84	3104.78	3095.62	2695.14	3454.06	2058.09	2512.4	2521.93	2232.65	3484.8	2727.99	49223.7	60259.6	-0.29184	0.052056	0.36646	FALSE
ENSGALG00000004521	962.294	1330.91	1088.68	1071.43	862.259	1373.07	1223.66	1173.69	1203.91	1217.03	1376.01	1487.49	23076.9	21251.9	0.11886	0.48441	0.90038	FALSE
ENSGALG00000004588	645.321	630.761	763.565	777.432	689.716	737.295	523.304	665.437	757.061	729.162	691.461	568.694	17533.7	19947.6	-0.18608	0.26315	0.73093	FALSE
ENSGALG00000004594	4122.95	2840.85	3446.23	2673.25	3106.88	3274.97	2954.52	3185.68	4120.93	3170.64	3676.76	2788.19	84086.9	86907.7	-0.047603	0.79151	1	FALSE
ENSGALG00000004818	549.858	503.955	615.782	648.888	545.849	607.826	517.925	609.306	710.575	679.814	606.59	559.818	18388.1	18298.8	0.0070287	0.93323	1	FALSE
ENSGALG00000004831	1009.25	922.939	1266.61	1281.6	1078.64	1208.8	913.89	1042.04	1227.88	1120.27	1084.66	873.659	22291.7	25462	-0.19184	0.24641	0.71348	FALSE
ENSGALG00000004848	1189.79	1272.94	1023.19	1106.87	1033.14	1223.39	888.654	1150.45	1206.25	1118.75	1148.9	991.802	24977.5	27694.2	-0.14896	0.39646	0.84423	FALSE
ENSGALG00000004871	1024.15	1193.99	1052.5	1400.69	1355.58	1083.33	941.677	1201.61	1230.81	1167.1	1225.56	992.266	16996.1	18799.6	-0.1455	0.38353	0.83524	FALSE
ENSGALG00000004952	1619.87	1431.42	1922.29	2177.09	1770.9	1892.79	1237.88	1776.06	1902.95	1842.78	1682.94	1483.79	11382.8	13074.3	-0.19988	0.22354	0.68612	FALSE
ENSGALG00000005490	1464.55	1419.43	1804.28	1975.81	1789.86	2185.76	1234.72	1807.88	1747.31	1783.15	1364	1332.42	25452.7	30771.4	-0.27377	0.099785	0.49347	FALSE
ENSGALG00000005749	610.62	624.062	688.418	739.038	666.996	693.84	433.129	611.581	644.911	611.546	603.285	458.773	7761.68	9778.34	-0.33322	0.045679	0.34509	FALSE
ENSGALG00000005948	1281.03	1388.9	1547.75	1585.84	1402.01	1655.87	931.621	1366.19	1510.43	1434.17	1383.31	1150.48	14190.6	17037.7	-0.2638	0.10777	0.51014	FALSE
ENSGALG00000006096	567.13	495.528	677.061	779.25	612.444	657.482	581.664	685.761	759.11	687.449	626.457	543.552	5668.78	5841.96	-0.043415	0.83716	1	FALSE
ENSGALG00000006175	2790.44	3058.15	2912.46	1884.01	2857.32	2037.4	2032.82	2291.15	2145.32	2426.93	2392.68	1764.28	53812.2	67421.2	-0.32527	0.058404	0.38829	FALSE
ENSGALG00000006179	1594.01	1480.13	1929.4	1860.94	1625.6	1834.54	1133.45	1511.16	1770.27	1707.77	1584.17	1295.42	24294.6	29399.5	-0.27516	0.093359	0.47912	FALSE
ENSGALG00000006322	846.845	932.293	711.072	735.625	970.015	510.257	553.732	650.024	577.069	505.6	1122.42	363.154	31144.5	40817.5	-0.39021	0.12716	0.54946	FALSE
ENSGALG00000006512	551.694	521.575	397.128	284.027	249.816	303.405	934.42	1322.46	604.387	576.616	438.145	553.799	25768.4	14134.7	0.86636	0.01448	0.20242	FALSE
ENSGALG00000006899	681.683	633.004	691.958	649.118	546.151	808.559	493.866	664.582	699.403	606.366	599.095	491.146	6323.8	7531.19	-0.25209	0.14427	0.57884	FALSE
ENSGALG00000007114	870.216	795.097	2035.12	3249.74	1630.42	766.446	1693.72	1990.43	1376.56	2022.03	1183.75	796.969	29058.3	31703	-0.12567	0.87201	1	FALSE
ENSGALG00000007205	1036.7	999.304	1068.65	1103.36	933.241	1311.82	1098.56	1141.94	1125.98	1112.6	1102.74	766.711	9964.74	10708	-0.10379	0.60445	0.96515	FALSE
ENSGALG00000007220	4057.47	4197.38	4762.2	4511.36	3843.86	4577.27	3246.47	4227.42	4112.06	4341.9	4352.27	3772.54	61497.4	70004.9	-0.18693	0.26147	0.72977	FALSE
ENSGALG00000007526	2824.57	1541.82	1172.03	1243.35	1209.99	2259.44	928.896	1838.02	2150.24	722.658	1172.57	840.592	26798.5	37766.3	-0.49495	0.211	0.67129	FALSE
ENSGALG00000007650	639.855	596.693	788.161	658.063	819.38	651.718	541.137	531.025	585.391	668.771	633.093	560.657	18706.9	23290.9	-0.3162	0.042556	0.33373	FALSE
ENSGALG00000007699	1468.79	1418.51	1526.64	1795.64	1557.5	1843.85	1133.21	1480.63	1770.57	1583.57	1494.44	1178.25	17916.2	21005.3	-0.22949	0.16663	0.61074	FALSE
ENSGALG00000007711	763.802	652.171	874.796	1000.42	776.857	854.522	689.66	897.032	929.264	901.785	789.8	754.657	24788.9	25954.8	-0.066306	0.71694	1	FALSE
ENSGALG00000007863	602.213	611.179	553.212	637.048	603.698	727.305	529.819	662.4	672.043	582.754	597.481	493.1	4966.88	5524.93	-0.15362	0.38228	0.83444	FALSE
ENSGALG00000008590	533.358	500.83	667.042	775.798	677.488	593.333	496.749	597.208	641.78	619.502	582.344	513.173	13752.3	15755.6	-0.19619	0.22737	0.69126	FALSE
ENSGALG00000008620	1544.86	1368.68	1856.53	2293.52	1657.27	1711.82	1097.91	1438.21	1607.53	1628.93	1395.11	1172.36	11795	15569.4	-0.40054	0.017147	0.22078	FALSE
ENSGALG00000008667	910.755	875.09	867.958	853.296	867.308	964.21	738.468	815.198	898.567	873.07	815.837	799.464	27375.3	31203.3	-0.18882	0.24627	0.71333	FALSE
ENSGALG00000008684	753.593	842.899	852.98	933.495	1000.94	894.25	722.293	830.97	872.924	837.668	885.455	738.931	24187.6	27508.1	-0.18559	0.24304	0.70945	FALSE
ENSGALG00000008806	1320.97	1079.78	1510.76	1919.41	1639.21	1568.6	1092.61	1291.01	1547.52	1431.64	1255.78	1075.68	13247.4	16418.3	-0.3096	0.054915	0.37736	FALSE
ENSGALG00000008969	516.865	489.186	505.017	558.152	700.534	453.574	512.435	529.621	541.417	527.671	609.831	510.896	28264	29669.7	-0.070024	0.6171	0.97095	FALSE
ENSGALG00000009621	3808.29	3291.6	3342.63	3242.18	2745.4	3747.07	3682.82	3052.58	3959.41	3445.84	3214.64	4251.88	106387	105263	0.015321	0.96308	1	FALSE
ENSGALG00000010023	1150.64	1186.06	1128.74	1262.98	1312.74	1147.59	980.522	1015.73	1051.07	1062.66	1038.78	953.516	24088.9	29911.7	-0.31234	0.053735	0.37283	FALSE
ENSGALG00000010077	2044.2	1985.11	2254.8	2384.39	2337.08	2105.53	1757.36	2118.63	2481.87	2365.93	2195.76	1762.11	37667.3	41039.5	-0.1237	0.47178	0.89261	FALSE
ENSGALG00000010124	2446.48	2636.73	2591.11	3021.74	2542.79	2715.4	1886.9	2442.23	2798.7	2497.92	2379.27	1959.37	33680.2	40551.2	-0.26784	0.11334	0.52116	FALSE
ENSGALG00000010243	633.509	809.849	703.453	325.311	728.633	650.653	574.655	653.294	652.338	482.364	639.792	499.789	9325.82	10797	-0.21133	0.26834	0.73536	FALSE
ENSGALG00000010343	2422.4	2179.46	2442.25	1699.7	1891.45	2896.48	2473.81	2609.88	2551.74	2448.56	2811.77	2154.17	59846.8	56910.7	0.072574	0.61735	0.97124	FALSE
ENSGALG00000010825	1341.49	1337.31	713.305	580.286	577.79	1069.63	858.557	935.024	1374.8	1519.3	999.955	822.124	16272.7	14788.7	0.13796	0.50258	0.91145	FALSE
ENSGALG00000010996	908.353	1185.75	1010.03	789.365	904.181	847.301	686.181	911.802	944.6	898.16	946.699	835.392	7752.88	8818.88	-0.18586	0.28681	0.75471	FALSE
ENSGALG00000011290	748.339	630.28	912.226	933.22	739.029	805.696	633.096	705.777	842.151	805.162	691.72	562.198	17414.2	20708.9	-0.24998	0.14117	0.57356	FALSE
ENSGALG00000011306	2416	2184.47	2738.2	2915.35	1584.16	2987.14	3573.73	2352.77	2340.18	2276.75	2380.46	4741.83	75682.6	67707	0.16066	0.61578	0.97028	FALSE
ENSGALG00000011472	3133.88	2811.51	4371.79	4129.07	3280.52	4301.53	2613.33	3573.42	4122.06	3378.4	3004.4	2874.04	23169	27572	-0.25101	0.14952	0.58756	FALSE
ENSGALG00000011511	423.002	517.245	552.444	505.756	443.494	618.397	620.099	480.139	556.216	434.5	503.202	592.503	12383.3	12622.2	-0.027566	0.81567	1	FALSE
ENSGALG00000011740	745.021	929.666	874.198	1362.82	1051.96	1318.74	730.241	1267.46	1181.57	1335.93	1279.97	1439.33	14627.2	13352.1	0.13158	0.57679	0.9496	FALSE
ENSGALG00000011806	1011.85	752.584	923.978	708.439	713.803	796.495	751.747	660.426	628.861	519.538	783.139	518.065	17616.5	23732.1	-0.42991	0.0089597	0.15735	FALSE
ENSGALG00000011902	5054.66	4710.89	5800.69	5508.47	3529.78	5561.88	5022.54	3733.93	3982.11	3774.92	4411.34	7599.7	102417	115208	-0.16979	0.31302	0.77725	FALSE
ENSGALG00000012112	780.737	683.135	716.961	673.563	972.214	764.695	506.831	857.317	794.703	542.705	827.352	518.595	6947.31	8267.33	-0.25097	0.13163	0.55787	FALSE
ENSGALG00000012172	1032.83	971.624	1254.9	1282.12	1151.97	1189.11	930.985	1161.93	1190.63	1199.27	1081.37	916.026	22823.1	25572.7	-0.16411	0.33681	0.79879	FALSE
ENSGALG00000012173	2227.94	2184.5	1864.96	1642.44	2110.83	1915.38	1713.03	2239.68	1910.48	2431.4	2590.37	2359.48	32659.9	30959.4	0.077142	0.64944	0.98604	FALSE
ENSGALG00000012229	2916.36	2540.44	3096.93	3369.1	2883.32	3396.12	2466.94	3082.13	3362.14	3227.46	2990.63	2536.29	18517.6	20133.2	-0.12068	0.47953	0.89691	FALSE
ENSGALG00000013990	1832.04	1680.02	2345.76	2586.94	1969.28	2162.75	1822.44	2238.32	2047.72	2112.11	2226.92	2042.97	21251	22609.2	-0.089377	0.57204	0.94894	FALSE
ENSGALG00000014121	528.169	493.651	629.066	588.843	545.739	570.233	448.242	569.051	618.057	511.584	502.926	448.604	5563.64	6360.33	-0.19307	0.25931	0.72764	FALSE
ENSGALG00000014176	5124.41	8242.15	3523.27	4855.56	2258.93	4780.72	8656.9	9116.42	6873.3	11065	7524.47	6695.25	62610.3	38022.5	0.71955	0.0011672	0.051415	FALSE
ENSGALG00000014432	1592.32	1425.38	1956.43	2183.27	1766.17	1906.48	1428.55	1719.5	1884.95	1903.13	1795.6	1425.06	14741.1	16597	-0.17108	0.30094	0.76806	FALSE
ENSGALG00000014442	1805.29	1829.87	1610.07	1893.13	1633.38	1924.8	1208.78	1462.65	1609.21	1632.41	1603.09	1388.55	32137.5	40683.6	-0.34019	0.036828	0.31113	FALSE
ENSGALG00000014833	865.756	671.759	1027.54	1106.78	1005.68	799.373	453.813	903.987	949.556	919.861	691.987	520.114	14070.6	18235.4	-0.37406	0.09178	0.47733	FALSE
ENSGALG00000015082	2162.87	1064.14	2357.99	2428.19	2122.01	1319.57	929.104	2228.54	2443.92	2449.59	1196.55	1040.81	29991.2	35050.7	-0.2249	0.56812	0.94773	FALSE
ENSGALG00000015195	2277.26	2449.08	2875.3	2934.44	2400.22	2837.33	1541.77	2269.56	2472.43	2422.46	2224.08	1906.81	19114.6	24759.2	-0.37329	0.023215	0.25328	FALSE
ENSGALG00000015339	714.193	730.26	855.208	957.936	825.732	897.649	669.549	822.502	900.792	890.962	796.704	659.86	12101.3	13411.3	-0.14829	0.38798	0.8379	FALSE
ENSGALG00000015372	578.345	318.339	660.366	691.439	644.522	402.666	326.868	716.892	671.327	682.909	335.618	295.839	3633.95	4147.32	-0.19064	0.63367	0.97921	FALSE
ENSGALG00000015617	3211.12	1446.28	3819.79	4134.15	3260.1	1842.33	1452.14	3396.83	3950.2	3548.83	1703.23	1460.9	20165.9	24203.5	-0.26329	0.54138	0.93244	FALSE
ENSGALG00000015704	787.636	653.032	682.322	873.391	859.167	555.57	389.413	827.534	824.097	848.501	451.922	448.117	8580.71	10450.6	-0.28442	0.28788	0.75504	FALSE
ENSGALG00000015917	4644.25	4541.95	5070.75	5251.4	4879.33	5120.27	3951.66	4771.22	5246.28	5383.59	4858.23	3934.07	117256	129617	-0.1446	0.40309	0.84907	FALSE
ENSGALG00000015937	1130.51	845.62	1686.9	1366.67	2065.64	512.842	1523.53	1804.67	795.781	1558.58	981.729	847.035	11642.6	12382.3	-0.088869	0.87305	1	FALSE
ENSGALG00000016232	956.862	878.59	1275.49	1228.53	1058.67	1104.42	806.588	1012.65	1146.17	1116.3	986.096	802.617	24860.8	29078.1	-0.22606	0.17891	0.62977	FALSE
ENSGALG00000016348	1424.15	1609.06	1461.13	2196.02	2493.57	1377.65	2031.73	2158.8	1587.12	1977.91	2267.73	1286.26	36282.2	35586.7	0.027922	0.84093	1	FALSE
ENSGALG00000016691	1821.07	1790.67	1984.78	2213.73	2154.44	1698.88	1722.85	1960.77	1909.88	2064.79	1775.56	1449.81	34367.6	38803.8	-0.17515	0.32673	0.78826	FALSE
ENSGALG00000017299	1396.14	1159.33	1567.6	1676.25	1300.9	1484.24	1254.3	1400.75	1615.01	1572.1	1416.06	1241.17	15202.2	16232.2	-0.094578	0.59055	0.95542	FALSE
ENSGALG00000017330	1369.37	1263.3	1703.01	1647.32	1585.13	1665.12	1220.46	1448.7	1665.76	1619.23	1465.4	1194.56	17089.7	19332.9	-0.17793	0.28159	0.74913	FALSE
ENSGALG00000017380	821.712	802.622	797.614	820.52	761.7	896.428	611.28	753.278	842.772	767.275	784.932	654.973	7224.63	8457.14	-0.22725	0.17163	0.61786	FALSE
ENSGALG00000019716	864.099	940.786	667.703	441.481	679.502	628.908	797.847	935.695	1058.94	1143.59	984.554	1217.85	35789.7	25884.4	0.46746	0.0042219	0.10627	FALSE
ENSGALG00000020193	888.341	844.922	1018.66	586.761	683.165	885.4	692.262	691.868	1096.95	1078.27	1041.81	848.609	8524.72	8119.21	0.070313	0.69444	1	FALSE
ENSGALG00000021139	3324.93	1831.44	3339.68	1221.08	1033.23	2429.97	2935.56	2673.96	2083.93	1033.66	972.614	1889.94	31889	38747.6	-0.28105	0.53922	0.93077	FALSE
ENSGALG00000021627	1729.13	1398.19	2502.35	1178.67	502.876	1532.38	624.507	1478.7	713.722	775.673	1296.7	1443.46	9157.98	13555.4	-0.56577	0.14283	0.57635	FALSE
ENSGALG00000021910	3905.8	3458.52	4711.82	5163.42	6423.67	3771.55	3192.4	4153.56	4210.93	3908.39	4117.69	3000.45	4655.65	5943.26	-0.35227	0.040869	0.32671	FALSE
ENSGALG00000022557	890.819	874.522	815.419	662.506	680.941	767.088	608.935	843.234	772.487	826.851	1004.53	752.105	24311.5	24985.2	-0.039432	0.84769	1	FALSE
ENSGALG00000023294	1432.14	1116.81	1636.82	1486.93	1152.14	1469.27	1139.82	1113.11	1293.89	1088.09	1148.94	1111.48	20287.8	25876	-0.351	0.02918	0.28064	FALSE
ENSGALG00000023818	12.5902	13.238	18.1498	109.448	6.00206	12.9352	155.052	1983.59	63.6588	158.132	244.236	712.589	5045.19	272.34	4.2114	0.02108	0.24482	FALSE
ENSGALG00000024398	2139.46	1556.96	2580.47	2842.17	2088.93	2198.41	1595.35	1860.02	2192.48	1956.86	1865.97	1646.49	12298.3	15689	-0.35129	0.031857	0.29022	FALSE
ENSGALG00000025842	843.58	439.715	764.378	884.296	644.35	647.326	588.27	783.963	766.332	701.591	575.644	729.585	40767.7	43884.6	-0.10629	0.56137	0.9445	FALSE
ENSGALG00000026077	1014.16	974.004	860.183	729.73	589.669	1056.69	709.188	750.987	917.361	689.665	741.848	957.364	20932	24280.8	-0.21411	0.17661	0.62644	FALSE
ENSGALG00000026137	1046.65	512.445	861.849	1051.14	1109.66	394.029	203.677	648.303	375.788	755.668	527.712	582.383	17332.8	29096.7	-0.74735	0.022139	0.2503	FALSE
ENSGALG00000026383	1662.68	1805.11	1927.93	1506.71	1285.63	2358.2	1240.53	1811.62	1822.4	1807.76	1591.78	1510.61	20367.9	23169.2	-0.18591	0.32111	0.78382	FALSE
ENSGALG00000026490	1189.89	1128.51	1416.94	1345.39	1312.89	1534.67	851.114	1091.39	1239.2	1410.69	1346.48	1043.64	18001.1	21550.4	-0.25963	0.098453	0.4909	FALSE
ENSGALG00000026970	1055.72	737.214	636.226	531.031	396.824	847.542	637.441	552.711	771.245	696.002	728.017	861.24	8985.41	9428.32	-0.069417	0.73272	1	FALSE
ENSGALG00000027035	931.909	1058.43	1159.93	1334.4	1201.97	1247.59	744.234	1057.12	1120.97	1120.68	992.059	877.273	18248.5	22530.4	-0.3041	0.062829	0.39989	FALSE
ENSGALG00000027142	870.354	857.694	1009.53	1057.07	897.597	1051.6	718.356	915.91	1030.61	987.565	851.511	686.453	11481.2	13403.2	-0.22332	0.19718	0.65625	FALSE
ENSGALG00000027151	599.538	500.973	509.116	539.135	493.23	568.333	471.464	567.206	552.936	528.444	548.298	509.614	13634.8	14528.5	-0.091596	0.59333	0.95764	FALSE
ENSGALG00000027269	4343.97	5088.46	6427.13	6519.69	6372.53	5150.19	3920.12	4937.37	4718.02	4723.28	5356.15	4641.48	111625	140978	-0.3368	0.031596	0.28925	FALSE
ENSGALG00000027501	4305.17	3735.39	5837.99	4838.75	4791.87	4058.12	4092.62	3247.63	3021.88	3484.19	3449.77	2566.08	226218	332953	-0.55761	0.00067903	0.03709	DOWN
ENSGALG00000028204	745.563	613.193	983.798	526.329	564.612	656.645	501.11	720.247	522.963	487.801	599.878	601.136	6737	8488.16	-0.33334	0.1125	0.51968	FALSE
ENSGALG00000028567	1893.36	1796.64	2509.26	2672.98	1374.96	2138.12	2680.56	1751.57	1828.33	1957.38	1851.26	3285.94	41961.6	41489.5	0.016325	0.96977	1	FALSE
ENSGALG00000028600	1726.81	1635.4	1709.18	1588.55	1306.51	1883.56	1670.6	2078.92	2075.79	1801.43	1847.57	1825.46	24541.9	22598.7	0.11901	0.41266	0.85524	FALSE
ENSGALG00000028749	3019.22	2156.44	3027.69	3012.49	2123.75	2853.37	2353.55	2444.48	3117.7	2688.82	3102.53	2526.32	86442.2	91361.2	-0.079845	0.61098	0.96794	FALSE
ENSGALG00000028774	915.302	1124.89	987.56	902.545	1042.69	1065.25	803.868	872.219	950.133	854.512	899.506	1105.67	5482.21	6361.58	-0.21463	0.15493	0.59668	FALSE
ENSGALG00000028810	940.321	1272.32	965.187	828.252	693.238	1183.81	1011.13	1089.07	1043.84	1096.08	748.378	616.447	3561.22	3946.5	-0.1482	0.62699	0.97658	FALSE
ENSGALG00000028872	1378.37	1337.02	1971.18	2027.47	1825.01	1657.78	1384.47	1612.59	1639.62	1752.58	1444.09	1233.69	23220.5	27564.8	-0.24743	0.14071	0.57353	FALSE
ENSGALG00000029367	694.02	547.016	545.645	502.077	483.49	550.625	528.668	514.232	558.363	592.335	488.686	433.433	5054.04	5694.08	-0.17203	0.35697	0.81526	FALSE
ENSGALG00000029500	965.216	881.274	746.87	733.65	800.112	876.335	962.469	997.636	758.044	833.648	666.12	1002.63	27887.3	28192.5	-0.015704	0.96752	1	FALSE
ENSGALG00000029837	1876.04	1735.28	1939.29	1961.75	1547.25	2476.1	1165.46	1688.25	1601.56	1672.68	1964.16	1544.15	8180.1	10332.6	-0.33702	0.03341	0.29814	FALSE
ENSGALG00000030378	1064.01	919.453	1253.1	1349.31	1199.7	1243.96	931.508	1152.23	1289.03	1201.35	1092.14	984.893	12375.2	13802.2	-0.15744	0.33561	0.79753	FALSE
ENSGALG00000030436	2773.98	1364.8	2344.78	2122.99	2034.21	2197.32	2423.86	2877.57	2529.25	2754.42	2112.87	2403.13	15602.6	14013.7	0.15495	0.30239	0.76914	FALSE
ENSGALG00000030878	2995.67	2753.6	3959.48	3625.88	3211.2	3427.86	2342.88	2988.36	3323.15	2924.03	3134.51	2614.59	21016.5	25592	-0.28417	0.077046	0.43931	FALSE
ENSGALG00000031038	1627.08	1522.71	2314.91	2502.96	1887.89	1802.55	1426.82	1625.25	1828.98	1554.37	2034.96	1790.34	14963.2	17988.9	-0.26569	0.079733	0.44907	FALSE
ENSGALG00000031099	1586.82	1581.94	1320.25	1554.3	1380.33	1751.29	1009.93	1297.02	1245.07	1308.25	1296.41	1111.89	10896.7	14485.3	-0.41069	0.012482	0.18834	FALSE
ENSGALG00000031164	754.832	664.907	487.454	488.476	146.113	404.359	639.123	690.433	394.711	636.393	736.284	646.405	4128.61	3441	0.26283	0.25088	0.71901	FALSE
ENSGALG00000031723	1181.57	1182.17	1140.95	1098.2	1016.03	1280.69	879.771	899.391	1076.49	1074.45	1088.16	946.108	4786.3	5848.01	-0.28903	0.074891	0.4326	FALSE
ENSGALG00000032002	1407.63	1496.65	1954.78	2106.86	1807.25	1746.36	992.895	1450.86	1581.54	1596.36	1503.54	1214.49	11458.9	15229.2	-0.41037	0.011337	0.17897	FALSE
ENSGALG00000032052	2444.64	1897.79	2815.37	2811.39	2216.48	2526.47	1803.18	1995.59	2432.68	2190.83	1990.61	1774	14229.4	18173.9	-0.35299	0.03121	0.28859	FALSE
ENSGALG00000032079	3109.65	2475.09	2352.4	2164.81	2427.94	2708.49	3407.3	3711.02	2607.14	2575.52	1752.96	3009.37	57319.9	54013	0.08573	0.52437	0.92042	FALSE
ENSGALG00000032142	10794.7	19430.8	10279.4	6473.3	8306.12	13290.9	12136.6	16232.7	10374.3	8643.32	9142.24	12120.6	312868	328677	-0.071116	0.92507	1	FALSE
ENSGALG00000032247	632.008	642.468	502.989	474.208	506.092	572.146	598.147	560.67	536.309	676.47	601.158	534.291	33180.9	33231.8	-0.0022082	0.92623	1	FALSE
ENSGALG00000032456	9945.87	10031.6	8135.5	7978.66	8031.74	10736.2	9634.83	12638.9	9819.17	9314.64	8165.68	10892.5	121787	116380	0.065519	0.61187	0.96845	FALSE
ENSGALG00000032595	1096.22	1355.81	1079.49	1074.64	1006.15	1277.28	683.453	1097.78	1109.05	898.198	1076.57	844.869	8991.06	11411.2	-0.34389	0.040631	0.32597	FALSE
ENSGALG00000032598	601.43	607.851	597.41	651.559	596.825	493.045	631.746	604.153	575.212	634.24	584.391	653.273	31760.5	32305.4	-0.024541	0.90464	1	FALSE
ENSGALG00000032637	734.554	921.364	848.77	881.343	940.334	769.23	683.122	814.912	769.588	669.48	830.226	679.914	4604.65	5556.07	-0.27097	0.099812	0.4935	FALSE
ENSGALG00000032875	919.278	741.327	1010.25	1115.9	893.154	866.064	638.578	665.061	723.208	850.503	659.844	672.948	5832.91	8119.07	-0.4771	0.0034089	0.095019	FALSE
ENSGALG00000033001	589.179	638.879	505.456	519.978	507.303	619.401	417.719	536.914	594.982	534.82	545.339	470.122	4362.82	5009.59	-0.19943	0.2473	0.71417	FALSE
ENSGALG00000033033	444.574	523.561	1340.35	1013.51	1290.86	580.874	1056.15	1002.43	350.361	651.505	996.608	335.114	30243.1	37839.3	-0.32328	0.43609	0.86915	FALSE
ENSGALG00000033314	862.098	562.138	261.918	339.453	318.312	498.495	712.037	1062.01	687.032	420.408	295.818	410.622	7933.66	6601.09	0.26528	0.39012	0.83952	FALSE
ENSGALG00000033446	1494.82	1331.61	1144.11	1024.94	795.44	1306.3	1070.66	902.757	1120.18	1064.49	1027.6	927.178	5326.46	6550.95	-0.29853	0.083411	0.45757	FALSE
ENSGALG00000033447	937.913	1163.77	1004.96	892.27	941.713	1235.78	1017.26	1166.03	1174.92	1117.37	993.876	940.571	9522.97	9676.01	-0.023001	0.97772	1	FALSE
ENSGALG00000033530	1127.95	1461.1	1318.09	1579.23	1287.39	925.559	731.613	826.198	753.95	555.666	705.53	894.43	13269.9	24133.9	-0.8629	9.0065e-08	0.00011506	DOWN
ENSGALG00000033884	677.63	631.406	764.777	814.163	763.999	730.845	684.033	676.782	748.906	777.262	740.88	727.836	33406.5	35508	-0.088017	0.55712	0.9422	FALSE
ENSGALG00000033932	2269.19	1632.08	2059.84	2505.4	2611.32	2146.69	1793.75	1188.15	1634.61	3502.78	3174.09	2843.53	48521.2	47874.4	0.019363	0.91132	1	FALSE
ENSGALG00000034177	863.243	1043.72	915.374	957.36	1023.77	1002.55	630.931	905.258	876.686	890.073	1011.1	813.688	9657.16	11494.6	-0.25128	0.11651	0.52618	FALSE
ENSGALG00000034811	955.81	770.96	1153.4	1184.88	935.732	1076.54	844.089	1048.77	1141.54	1016.28	915.075	781.089	10810.8	12082.6	-0.16046	0.3612	0.81852	FALSE
ENSGALG00000034868	1036.3	965.732	724.536	580.719	701.413	827.787	762.176	1019.03	1042.04	1133.86	1053.36	1372.68	47418.4	37799	0.3271	0.061974	0.39711	FALSE
ENSGALG00000035079	1339.25	1278.35	1523.81	1544.52	1329.74	1595.68	1165.33	1447.44	1515.49	1534.77	1358.75	1181.39	29881.3	33103	-0.14772	0.39473	0.84277	FALSE
ENSGALG00000035086	9434.53	8500.13	11362.1	9870.19	7962.74	12141.7	6487.2	8000.49	9332.26	8069.53	9965.2	12575.7	81173.9	93557.7	-0.20484	0.1717	0.61799	FALSE
ENSGALG00000035138	1111.51	880.433	1056.2	955.146	857.358	1185.53	1011.93	1016.53	1095.84	1075.66	1145.3	1024.06	4154.64	4173.15	-0.0064139	0.962	1	FALSE
ENSGALG00000035252	689.792	746.957	884.331	941.243	920.111	864.475	569.303	758.119	778.852	768.631	722.48	600.144	14654.6	18556.6	-0.34058	0.036854	0.31124	FALSE
ENSGALG00000035334	9283.38	8398.93	8861.81	8400.21	7952.42	9976.95	8644.58	10980.5	9189.08	8302.97	7370.83	8957.51	123344	128734	-0.061701	0.7694	1	FALSE
ENSGALG00000035506	1338.73	1300.75	1582.39	1599.41	1493.82	1626.73	1060.82	1444.54	1522.81	1442.68	1429.39	1240.83	14271.1	16523.6	-0.21143	0.19078	0.64623	FALSE
ENSGALG00000035584	485.211	627.516	385.56	498.588	500.896	599.75	609.166	559.785	552.472	528.472	551.679	644.775	47383	44912.3	0.077259	0.64057	0.98308	FALSE
ENSGALG00000035677	610.152	534.588	727.046	785.572	663.983	661.44	500.395	632.79	712.025	700.018	622.739	525.273	12954.7	14740.4	-0.18631	0.26599	0.73324	FALSE
ENSGALG00000035996	1005.02	1019.74	926.065	942.935	941.345	1136.62	748.66	1006.4	935.779	866.38	966.113	703.311	7975.07	9595.06	-0.26679	0.11768	0.52825	FALSE
ENSGALG00000036086	1475.14	1447.28	1414.25	1224.65	980.738	1883.62	1805.94	1305.68	1118.54	1562.17	1352.11	1755.27	19138.8	19237.6	-0.0074254	0.94372	1	FALSE
ENSGALG00000036099	797.64	799.55	1021.2	1117.01	958.874	928.091	687.254	900.775	958.957	971.51	899.571	766.504	9851.49	11264.4	-0.19336	0.24141	0.70739	FALSE
ENSGALG00000036229	1360.86	1079.62	1072.13	929.972	1058.21	1136.63	1449.06	1629.5	1179.27	1188.81	772.846	1232.07	30194.7	28369.6	0.089951	0.47601	0.89467	FALSE
ENSGALG00000036774	1806.11	923.291	2141.66	2320.36	1972.35	1176.49	843.562	2026.15	2163.59	2178.36	1178.86	988.554	17863.6	20675.5	-0.21089	0.58289	0.95099	FALSE
ENSGALG00000036790	1347.9	1268.35	1741.56	1796.88	1548.28	1672.35	1049.61	1309.25	1394.14	1440.48	1106.89	1023.72	14302.7	19320.8	-0.43386	0.0087759	0.15584	FALSE
ENSGALG00000037286	700.837	681.103	527.67	637.398	590.524	604.923	696.269	524.524	577.863	764.631	760.376	817.036	31323	29906.3	0.066775	0.74008	1	FALSE
ENSGALG00000037332	527.455	783.395	513.098	564.607	545.119	590.504	572.174	728.939	740.676	647.518	515.812	752.803	9250.7	8664.49	0.094448	0.49192	0.90454	FALSE
ENSGALG00000037441	2357.06	1857.18	2978.84	2868.57	2069.5	2353.02	1819.76	1973.24	2266.27	2240.39	1769.25	1553.86	8718.03	11504.2	-0.40009	0.020381	0.2413	FALSE
ENSGALG00000037716	1305.02	874.938	1754.74	1653.37	1176.56	1329.97	907.587	971.281	1022.2	936.389	997.554	867.08	8648.52	13022	-0.59042	0.0022622	0.073669	FALSE
ENSGALG00000037805	1646.94	1461.2	1916.57	2124.7	1525.35	1737.65	1391.48	1561.48	1707.03	1644.27	1406.61	1436.56	12377.6	14899.4	-0.26752	0.10873	0.51231	FALSE
ENSGALG00000037838	1226.7	897.748	900.058	802.49	735.229	1047.61	1063.57	1571.93	1125.88	1099.12	1016.99	1792.17	11798.3	9097.95	0.37496	0.076437	0.43758	FALSE
ENSGALG00000037953	1235.33	1547.82	1123.1	1238.63	919.157	1298.42	1489.62	1142.87	1300.86	1265.35	1251.1	1441.98	33832.7	33429.5	0.017294	0.86792	1	FALSE
ENSGALG00000038003	1112.18	947.255	1072.29	1016.06	1079.18	1047.85	861.043	1009.29	956.196	1031.92	1303.7	1045.46	18355.7	19565.3	-0.092073	0.51293	0.91748	FALSE
ENSGALG00000038589	952.812	1229.58	1070.7	1059.66	1010.42	1090.78	610.981	759.476	797.923	950.405	827.679	531.624	6399.67	9647.97	-0.59223	0.00045356	0.029164	DOWN
ENSGALG00000038593	533.385	1085.24	1508.24	1091.07	1045.77	1213.58	250.048	762.063	662.94	982.266	658.78	500.021	5297.88	9434.72	-0.83256	0.006575	0.1356	FALSE
ENSGALG00000038671	626.183	482.662	587.261	656.526	526.676	585.415	586.428	512.149	472.054	602.527	572.153	537.531	8490.8	9485.3	-0.15979	0.32223	0.78557	FALSE
ENSGALG00000038672	1194.24	1152.26	1252	1346.71	1090.25	1366.55	923.054	986.366	1014.71	961.731	901.262	803.996	5900.83	8256.8	-0.48467	0.0035308	0.09689	FALSE
ENSGALG00000038714	740.092	993.607	802.983	799.666	738.95	902.606	451.02	687.331	690.234	725.617	645.576	537.265	5313.76	7442.2	-0.486	0.0040146	0.10327	FALSE
ENSGALG00000038801	867.784	907.895	756.425	764.711	689.335	811.248	775.988	766.79	830.653	812.508	757.809	724.16	23615.6	25628.7	-0.11802	0.53081	0.92535	FALSE
ENSGALG00000038941	2137.41	3169.03	2895.26	2361.71	3089.66	2673.81	1408.74	1834.55	2584.21	2127.28	2215.84	2029.71	8189.18	11527.8	-0.49333	0.0018792	0.068253	FALSE
ENSGALG00000039212	613.063	691.932	680.965	657.765	615.608	713.315	492.098	609.567	660.389	555.939	557.229	533.234	5346.33	6572.77	-0.29795	0.074011	0.43001	FALSE
ENSGALG00000039470	3329.42	2972.39	3965.23	4144.31	3007.31	3496.46	2208.3	2870.49	3319.18	3253.89	2719.23	2396.44	35615.2	46921.5	-0.39776	0.017036	0.22078	FALSE
ENSGALG00000039474	555.968	942.585	626.156	854.812	565.46	609.452	643.705	591.731	673.659	933.094	872.147	662.904	9999.15	10009	-0.0014222	0.92218	1	FALSE
ENSGALG00000040180	600.152	788.941	663.728	744.411	666.082	570.072	492.168	539.119	532.075	531.792	567.173	444.002	6741.36	9225.78	-0.45263	0.0070652	0.14	FALSE
ENSGALG00000040368	942.501	939.764	706.287	628.136	498.518	799.757	1092.63	1076.49	1175.13	1011.49	970.314	904.804	18261.6	13993.1	0.3841	0.0089524	0.15735	FALSE
ENSGALG00000040832	765.764	909.312	611.938	497.743	424.412	795.604	863.284	1026.72	1384.8	892.192	1080.72	836.126	52106.1	36216.4	0.52481	0.0055781	0.12388	FALSE
ENSGALG00000041063	595.434	683.728	597.323	551.868	537.337	560.746	462.477	520.471	572.226	509.161	507.2	553.732	5633.36	6705.08	-0.25126	0.12976	0.55513	FALSE
ENSGALG00000041091	5648.3	4914.87	4568.01	4232.75	4143.95	5534.93	6599.54	7018.03	5563.25	5365.61	4214.28	6119.37	70104.7	61664.9	0.18506	0.20068	0.65979	FALSE
ENSGALG00000041164	661.371	635.674	594.279	620.649	507.541	710.367	466.954	563.809	587.045	548.37	531.935	526.587	4811.32	5873.86	-0.28788	0.08445	0.45988	FALSE
ENSGALG00000041266	2267.5	1889.14	2315.17	2258.59	1310.31	2727.88	2558.3	1893.42	1915.47	1787.48	1914.31	3763.18	35597.3	34986.6	0.024962	0.95163	1	FALSE
ENSGALG00000041277	541.847	538.777	623.317	729.299	637.451	785.403	445.519	410.865	607.966	505.645	616.6	548.751	6802.48	8849.44	-0.37953	0.011338	0.17897	FALSE
ENSGALG00000041380	8535.62	5082.32	3257.42	3860.35	3520.67	4309.12	3151.87	2646.6	3096.99	2156.35	2533.81	1637.1	55796.2	110741	-0.98895	0.0054145	0.12207	FALSE
ENSGALG00000041392	709.909	627.433	554.254	577.453	793.897	567.967	677.476	780.534	770.46	703.803	971.113	648.26	43009	38051.8	0.17667	0.28069	0.74845	FALSE
ENSGALG00000041502	5562.47	4815.98	3507.6	3653.41	2858.52	5236.85	3416.86	7029.94	4373.13	3445.37	2930.6	3362.74	60019.1	65751	-0.13159	0.79436	1	FALSE
ENSGALG00000041634	3347.72	2295.33	3497.08	3064.3	2092.46	3738.66	3590.94	2608.52	2743.27	2179.94	2724.56	3883.88	68841.6	74622	-0.11632	0.45811	0.88292	FALSE
ENSGALG00000041826	2569.75	1718.28	3126.5	2301.68	2705.93	2432.16	1565.95	2223.56	1810.84	2343.59	2716.46	2397.06	15742.5	18886.2	-0.26268	0.10128	0.49747	FALSE
ENSGALG00000042459	750.501	817.61	811.739	746.982	630.247	931.452	559.083	709.031	808.532	805.605	760.766	627.055	5017.76	5814.21	-0.21254	0.21397	0.67556	FALSE
ENSGALG00000042750	2129.98	2271.36	1526.04	1510.51	1700.18	1904.56	2107.39	2738.26	1976.72	2107.87	1478.53	2081.16	35872.1	33334.4	0.10585	0.3872	0.83766	FALSE
ENSGALG00000043329	533.221	423.426	500.043	413.613	315.979	529.479	623.725	529.372	645.776	644.248	540.836	582.946	3516.86	2840.91	0.30794	0.048864	0.35687	FALSE
ENSGALG00000043379	1119.28	1351.67	1527.74	1827.66	1334.7	1470.35	988.733	1416.93	1144.82	1380.9	1261.83	1020.03	14785.8	18642.2	-0.33436	0.048682	0.35649	FALSE
ENSGALG00000043641	1965.11	2603.99	2690.65	1637.64	1178.81	1719.75	1467.88	1387.52	1291.18	1563.64	2096.96	1854	27581.2	35714.3	-0.37282	0.1128	0.52034	FALSE
ENSGALG00000043768	1281.12	1139.67	847.695	875.353	962.227	1080.96	1427.38	1354.14	1136.01	942.561	650.48	1123.68	20258.9	19950.4	0.022138	0.77044	1	FALSE
Novel00077	357.342	543.976	173.409	241.616	196.11	314.958	450.384	722.667	711.306	503.351	412.073	252.678	10214.1	6404.34	0.67344	0.02472	0.26005	FALSE
Novel00273	557.437	527.89	542.781	595.094	563.598	612.556	447.778	593.525	537.137	560.54	576.698	461.499	3650.44	4113.29	-0.17222	0.31159	0.77536	FALSE
Novel00456	572.14	556.184	290.107	296.341	229.504	629.905	477.983	810.24	640.264	378.95	392.331	380.837	20716.9	18208	0.18624	0.45087	0.87852	FALSE
Novel00701	2138.74	1435.65	1563.63	761.139	593.546	1214.55	1144.35	1392.73	1015.11	1686.97	1905.87	1593.38	70628.5	65911.2	0.099727	0.70039	1	FALSE
Novel01155	640.973	1456.54	1467.64	1332.92	1742.97	1125.47	313.804	882.816	538.962	947.014	827.873	630.003	2529.32	4949.55	-0.96855	0.00036139	0.025272	DOWN
Novel01221	555.986	961.302	998.579	877.421	889.745	1283.54	1163.76	789.682	1134.7	1320.98	1419.52	1775.49	15781.2	12241.2	0.36647	0.15086	0.59003	FALSE
Novel01522	2532.48	3001.46	2851.09	2189.64	2323.32	2565.02	2036.2	2278.45	2467.51	2652.28	3448.66	2574.13	22005.8	23229.2	-0.078052	0.60155	0.96289	FALSE
Novel01612	711.533	426.665	651.963	180.784	230.927	729.046	831.983	615.571	481.425	737.074	534.403	683.011	4347.73	3497.36	0.314	0.27384	0.74137	FALSE
Novel01677	452.974	596.587	667.953	726.427	803.686	594.692	879.981	887.866	752.425	1041.19	790.281	727.289	11486.9	9151.99	0.32783	0.035378	0.30642	FALSE
Novel01690	3123.72	3023.14	3478.77	2910.73	2219.53	3274.56	2063.15	2266.11	2562.75	2391.65	2541.35	2710.24	15854.8	20820.3	-0.39307	0.013525	0.19485	FALSE
Novel01809	889.297	956.32	787.485	729.314	720.452	790.813	609.671	598.068	685.209	780.058	891.051	579.33	10206.3	12665.3	-0.31142	0.060698	0.39352	FALSE
Novel01848	510.804	543.78	480.649	440.314	468.908	539.97	504.491	552.152	559.277	622.46	591.773	588.32	3046.77	2804.33	0.11962	0.45277	0.87944	FALSE
Novel01877	982.633	876.549	915.32	1033.11	932.119	1054.21	947.789	898.867	937.858	1077.79	1052.1	960.269	15050.7	15680.6	-0.059152	0.69535	1	FALSE
Novel01922	1146.66	1361.09	1699.05	1546.99	479.227	389.348	561.045	729.72	580.319	860.654	698.902	327.628	12771.1	23838.7	-0.90042	0.055136	0.37826	FALSE

## Sheet: Table S4c
Supplement Table S4c Genes highly expressed in group P but not abundantly expressed in group C
Gene_id	C1_fpkm	C2_fpkm	C3_fpkm	C4_fpkm	C5_fpkm	C6_fpkm	P1_fpkm	P2_fpkm	P3_fpkm	P4_fpkm	P5_fpkm	P6_fpkm	P_readcount(PvsC)	C_readcount(PvsC)	log2FoldChange(PvsC)	pval(PvsC)	padj(PvsC)	significant(PvsC)
ENSGALG00000001992	564.507	603.347	443.903	428.809	321.565	577.598	542.124	597.506	593.253	622.182	507.755	579.903	22166.4	19987.6	0.14927	0.27611	0.74297	FALSE
ENSGALG00000006512	551.694	521.575	397.128	284.027	249.816	303.405	934.42	1322.46	604.387	576.616	438.145	553.799	25768.4	14134.7	0.86636	0.01448	0.20242	FALSE
ENSGALG00000023818	12.5902	13.238	18.1498	109.448	6.00206	12.9352	155.052	1983.59	63.6588	158.132	244.236	712.589	5045.19	272.34	4.2114	0.02108	0.24482	FALSE
ENSGALG00000031164	754.832	664.907	487.454	488.476	146.113	404.359	639.123	690.433	394.711	636.393	736.284	646.405	4128.61	3441	0.26283	0.25088	0.71901	FALSE
ENSGALG00000033314	862.098	562.138	261.918	339.453	318.312	498.495	712.037	1062.01	687.032	420.408	295.818	410.622	7933.66	6601.09	0.26528	0.39012	0.83952	FALSE
ENSGALG00000043329	533.221	423.426	500.043	413.613	315.979	529.479	623.725	529.372	645.776	644.248	540.836	582.946	3516.86	2840.91	0.30794	0.048864	0.35687	FALSE
Novel00077	357.342	543.976	173.409	241.616	196.11	314.958	450.384	722.667	711.306	503.351	412.073	252.678	10214.1	6404.34	0.67344	0.02472	0.26005	FALSE
Novel00456	572.14	556.184	290.107	296.341	229.504	629.905	477.983	810.24	640.264	378.95	392.331	380.837	20716.9	18208	0.18624	0.45087	0.87852	FALSE
Novel01612	711.533	426.665	651.963	180.784	230.927	729.046	831.983	615.571	481.425	737.074	534.403	683.011	4347.73	3497.36	0.314	0.27384	0.74137	FALSE
Novel01848	510.804	543.78	480.649	440.314	468.908	539.97	504.491	552.152	559.277	622.46	591.773	588.32	3046.77	2804.33	0.11962	0.45277	0.87944	FALSE

## Sheet: Table S5a
Supplement Table S5a ALL DEGs between group C and group P
Gene_id	C1_fpkm	C2_fpkm	C3_fpkm	C4_fpkm	C5_fpkm	C6_fpkm	P1_fpkm	P2_fpkm	P3_fpkm	P4_fpkm	P5_fpkm	P6_fpkm	P_readcount(PvsC)	C_readcount(PvsC)	log2FoldChange(PvsC)	pval(PvsC)	padj(PvsC)	significant(PvsC)
ENSGALG00000000059	5.99481	7.22673	5.80603	5.33774	4.66931	6.80945	11.9909	9.47709	10.6024	7.6504	8.19284	11.1894	374.297	240.688	0.63702	0.00039718	0.026784	UP
ENSGALG00000000109	90.0076	88.5933	64.7298	54.2803	65.6489	82.5711	179.81	135.904	114.589	121.213	80.6794	183.386	2156.1	1247.42	0.78948	0.00047312	0.029964	UP
ENSGALG00000000112	0.223166	0.321245	0.209023	0.324276	0.246668	0.341799	2.1048	1.69667	1.33777	1.36072	0.578007	1.36376	24.4507	5.10751	2.2592	5.8067e-07	0.00043075	UP
ENSGALG00000000186	7.39089	7.86158	7.60945	7.37828	7.13405	7.06099	13.9214	12.4276	14.4864	11.6708	11.1706	14.2507	223.547	134.821	0.72954	0.00018705	0.017585	UP
ENSGALG00000000284	8.35174	8.37505	6.50405	7.09051	6.88716	10.1839	17.4619	11.0294	12.8443	10.9349	10.5861	14.7823	266.819	172.853	0.62632	0.0010829	0.04941	UP
ENSGALG00000000311	2.72265	2.63914	2.17401	2.34337	3.52466	2.15999	1.22827	1.32819	1.13503	1.78705	2.64934	1.29008	156.144	270.687	-0.79375	7.1324e-05	0.0097629	DOWN
ENSGALG00000000314	2.47931	1.73132	1.72928	2.09514	1.81916	1.89287	4.89458	3.55529	3.76825	3.31174	2.12531	4.47724	135.488	76.2485	0.82938	0.00013024	0.014685	UP
ENSGALG00000000362	1.65812	1.95675	1.50691	1.47107	1.06698	1.6667	4.61168	2.21968	2.55051	2.02426	2.74967	3.53364	346.288	194.736	0.83045	0.00050262	0.030922	UP
ENSGALG00000000452	12.5063	10.9456	11.292	11.7516	13.7349	9.56631	28.2069	21.2573	18.6173	19.8377	19.1759	26.2564	861.401	476.729	0.85352	7.8507e-07	0.00048793	UP
ENSGALG00000000461	10.9258	11.0094	5.72484	7.60185	7.9487	11.5119	15.9343	12.7526	16.508	14.3896	14.1749	16.4487	1303.46	834.698	0.64302	0.00011993	0.014072	UP
ENSGALG00000000541	40.9123	38.1512	33.8867	37.3509	51.528	30.4863	84.1397	80.6005	65.7493	56.0225	56.4419	74.1391	3010.18	1765.4	0.76986	2.299e-06	0.0010144	UP
ENSGALG00000000616	379.533	378.894	247.225	222.176	334.429	309.092	651.036	524.368	384.646	456.499	393.543	552.624	11918.7	7941.18	0.58581	0.00029967	0.02274	UP
ENSGALG00000000625	6.11104	4.00671	4.34503	3.84575	3.66819	4.37237	13.4626	10.2289	9.89348	8.70336	4.72395	13.1447	217.803	101.243	1.1052	2.4809e-05	0.004961	UP
ENSGALG00000000747	4.31035	4.64004	3.71119	4.70716	4.43877	4.12385	10.5233	7.72364	8.26507	7.25514	4.74602	9.65269	581.069	331.064	0.8116	5.495e-06	0.0018583	UP
ENSGALG00000000817	26.236	25.0856	26.0169	25.0502	28.0147	23.3812	57.099	60.2436	45.5458	35.3634	31.6597	47.5354	1312.34	767.855	0.77324	2.8346e-05	0.005507	UP
ENSGALG00000000866	41.062	40.092	22.7157	28.2253	28.393	44.5841	52.8079	62.4194	57.9857	55.9104	44.2441	56.0807	4785.83	3135.66	0.61	0.00010416	0.013007	UP
ENSGALG00000001177	5.60345	7.49282	4.18565	4.64308	5.01627	7.45748	9.06595	9.85822	8.49	9.03572	8.84913	11.1626	395.548	253.759	0.6404	0.0003948	0.026703	UP
ENSGALG00000001183	10.0916	13.2045	7.70762	7.81215	9.19241	8.94857	25.2754	12.7307	16.3483	13.9228	13.5857	16.5691	2499.21	1533.97	0.7042	0.00028859	0.022171	UP
ENSGALG00000001311	0.356973	0.548116	0.254742	0.345805	0.55615	0.595086	1.16127	0.950065	1.35865	0.583496	0.567461	1.15421	54.8483	26.5894	1.0446	0.00043924	0.028614	UP
ENSGALG00000001325	1.09713	1.38671	0.325825	0.622133	0.141972	1.03046	2.75574	1.75952	4.41124	4.37515	4.5897	4.39702	134.817	29.4387	2.1952	6.6061e-10	3.1295e-06	UP
ENSGALG00000001362	17.4795	20.7677	17.7157	17.0906	16.2636	17.5812	31.4888	30.7973	28.8017	25.5106	20.1211	28.4756	820.57	560.988	0.54866	0.00077408	0.040724	UP
ENSGALG00000001376	4.56451	5.07766	4.76964	4.75259	5.18936	4.7014	10.1314	6.22724	7.47645	8.38661	7.25597	12.7345	271.452	159.99	0.76272	0.00018676	0.017585	UP
ENSGALG00000001412	12.9572	9.65149	9.80409	8.47548	9.55043	10.6802	18.0921	19.9449	16.3963	13.3516	12.5741	20.4531	932.086	596.738	0.64337	0.00013539	0.014826	UP
ENSGALG00000001559	4.57474	1.01668	3.15723	2.17694	1.31292	2.45846	0.654671	0.296847	0.48111	0.616239	0.230969	0.653944	11.7836	63.1946	-2.423	3.6182e-05	0.0062414	DOWN
ENSGALG00000001573	81.5858	86.1406	62.4996	43.9675	60.0299	98.9501	168.082	138.067	98.1993	155.773	103.159	174.237	3157.35	1725.81	0.87144	3.9128e-05	0.0064673	UP
ENSGALG00000001693	8.73184	7.61652	8.77008	7.34284	5.97976	8.2274	14.8513	10.75	12.2505	12.1167	13.3877	12.4633	329.753	215.601	0.61302	0.00081288	0.041488	UP
ENSGALG00000001845	3.73714	3.06601	2.97411	2.9577	3.84453	3.22797	8.04438	5.13945	4.46582	4.6114	5.06108	7.96081	232.911	138.503	0.74986	0.00029258	0.022323	UP
ENSGALG00000001948	27.5384	27.6908	26.5117	28.9065	29.1889	27.3527	62.3748	49.4006	44.0332	34.0128	32.653	50.0911	2180.05	1416.32	0.62221	0.00012842	0.014685	UP
ENSGALG00000002015	3.9187	5.2406	4.91353	6.49011	6.20366	4.81253	9.21569	11.7405	11.0507	9.24919	7.34842	14.2481	161.463	85.3695	0.91941	1.7967e-05	0.003965	UP
ENSGALG00000002080	2.91517	1.86889	2.94622	2.15437	2.15254	2.92834	1.29723	1.16096	1.8716	1.30308	1.37227	0.829847	126.628	256.588	-1.0189	7.2574e-07	0.00047683	DOWN
ENSGALG00000002170	2.40841	2.11118	1.64975	0.696437	0.985354	1.66739	4.21498	2.62951	2.37029	3.05227	3.02066	3.22179	83.0827	45.3722	0.87274	0.00031689	0.023892	UP
ENSGALG00000002247	8.0882	9.31432	8.18852	8.84943	8.10096	8.10963	16.6807	15.3395	12.945	11.4676	10.787	19.657	537.088	331.098	0.6979	8.4854e-05	0.011279	UP
ENSGALG00000002517	168.818	160.217	245.238	237.732	212.938	208.572	99.9299	142.21	93.1912	140.272	168.168	131.843	960.546	1610.73	-0.74579	1.6954e-05	0.0038224	DOWN
ENSGALG00000002546	16.633	18.5682	11.4727	12.3827	12.8057	16.6551	29.3316	24.5348	25.0004	19.0517	23.6639	35.7653	3098.22	1842.33	0.74991	2.8873e-05	0.005507	UP
ENSGALG00000002564	5.95425	6.82782	5.90773	5.25472	4.57345	7.81669	13.0426	9.39382	9.80543	7.08785	7.89963	10.8611	371.48	246.888	0.58943	0.0010943	0.049712	UP
ENSGALG00000002666	35.103	29.2186	24.1821	23.12	29.0675	27.7205	45.7137	46.5433	45.6561	44.2768	35.8504	55.0151	1587.55	1031.88	0.62153	0.00017858	0.017327	UP
ENSGALG00000002708	3.72129	3.20174	3.40533	3.41841	2.7043	4.43606	7.50144	6.04688	5.23495	5.44794	4.52986	7.66737	275.385	167.573	0.71666	0.00018072	0.01741	UP
ENSGALG00000002759	2.57644	2.71269	2.07826	2.81163	2.44559	1.57381	1.53331	1.30515	0.987604	1.4059	2.13053	1.69941	139.513	230.62	-0.72511	0.00015428	0.015981	DOWN
ENSGALG00000002945	13.0751	8.67372	9.27401	12.1332	9.27926	8.0362	20.2781	18.5024	15.7687	14.1043	11.885	14.6529	364.058	244.759	0.57281	0.00094062	0.045064	UP
ENSGALG00000003034	18.0004	14.3614	14.4354	19.2608	21.0144	24.7119	26.7509	29.2997	43.7256	32.095	23.8356	28.2789	253.671	162.432	0.64312	0.001065	0.048781	UP
ENSGALG00000003068	5.9524	6.1203	4.84508	6.13228	7.2894	5.72632	10.9824	8.50343	9.18	9.64425	8.78247	10.6174	395.13	260.455	0.60129	0.0010515	0.048265	UP
ENSGALG00000003149	10.2204	8.87281	6.46976	6.53164	8.9523	7.50716	14.6118	11.0498	12.4428	10.9148	10.3013	15.634	1762.2	1205.11	0.54821	0.0011082	0.049969	UP
ENSGALG00000003369	13.8915	14.5766	13.3322	12.9922	14.3847	13.4976	25.7891	29.2955	18.8551	20.4325	18.5684	27.6144	998.044	618.693	0.68988	3.6369e-05	0.0062414	UP
ENSGALG00000003412	19.1028	17.385	14.4468	12.9483	10.8532	13.8817	32.5867	19.1135	21.7598	24.7734	20.3546	30.9369	1324.46	833.717	0.66778	0.00012382	0.01438	UP
ENSGALG00000003447	8.83836	7.59083	7.82949	8.16176	8.10748	7.85094	20.9546	15.7509	13.4022	10.655	9.29928	17.7681	857.891	501.184	0.77545	0.00026244	0.020984	UP
ENSGALG00000003712	10.495	9.82238	8.13677	9.62264	8.33357	8.78581	17.3578	13.3862	13.9045	13.3485	13.4346	14.9433	795.537	538.109	0.56403	0.00078528	0.040725	UP
ENSGALG00000003736	10.7811	7.9661	8.68931	8.96462	12.0699	6.78305	15.4747	15.9349	12.8052	13.9811	12.3305	17.2169	614.87	407.523	0.5934	0.00073469	0.039382	UP
ENSGALG00000003839	6.9818	9.31529	13.021	7.68701	6.71759	5.41056	37.1309	26.2908	19.8507	19.5871	9.77177	27.6919	735.741	274.652	1.4216	3.3203e-05	0.0058539	UP
ENSGALG00000003913	3.38582	4.0919	5.85461	3.69439	7.00773	4.99845	2.76941	2.06422	3.53141	3.52899	3.70477	2.93055	161.234	266.56	-0.7253	0.00078407	0.040725	DOWN
ENSGALG00000003920	10.7422	12.4391	13.3472	12.3261	13.8101	10.7372	24.1897	20.9002	21.4648	20.9827	16.9742	23.1468	1042.49	633.417	0.7188	1.8754e-05	0.0040304	UP
ENSGALG00000004066	0.65639	0.70865	0.653215	0.43715	0.399034	0.682181	1.63135	1.24759	1.51651	0.963505	1.65285	1.44848	33.3028	14.7912	1.1709	0.0009437	0.045117	UP
ENSGALG00000004280	15.0278	14.9169	15.9711	17.7437	20.4917	17.0492	29.9232	24.6824	24.0881	26.5097	21.376	33.5661	1024.28	683.52	0.58355	0.00082567	0.041914	UP
ENSGALG00000004285	34.6594	39.4168	29.231	42.2897	45.4674	26.8285	60.2189	53.9864	54.3269	88.6373	65.7153	61.8359	2026.08	1205.57	0.74898	2.2671e-05	0.0046137	UP
ENSGALG00000004386	6.2816	6.01122	2.23739	2.34261	3.4683	3.2263	9.41189	8.82309	7.86689	10.203	4.44718	9.57163	276.65	136.032	1.0241	7.381e-05	0.010043	UP
ENSGALG00000004562	2.58689	2.35975	3.46507	2.80237	2.23007	3.2865	1.67336	1.50893	2.19545	1.68348	1.92119	1.52355	183.474	310.195	-0.7576	5.0915e-05	0.0078483	DOWN
ENSGALG00000004597	3.89435	5.94358	4.87804	4.49975	5.84993	2.87448	1.38738	1.88965	1.96883	3.47544	4.59091	2.42124	54.5608	101.542	-0.89614	0.00064267	0.035784	DOWN
ENSGALG00000004613	2.46203	2.05261	2.93054	2.0372	1.98429	2.98524	1.80432	1.64417	1.97295	0.984579	1.50562	1.37568	117.086	193.624	-0.72569	0.00033021	0.024034	DOWN
ENSGALG00000004784	1.37562	1.64283	1.4316	1.67807	3.91949	1.02558	3.11694	2.80569	5.24294	3.58979	5.68892	4.28968	78.6083	36.7635	1.0964	0.00078114	0.040725	UP
ENSGALG00000004798	28.4292	23.782	24.3165	26.3447	27.0674	22.4869	51.4843	42.7798	38.6748	37.6648	34.4957	60.3868	2401.17	1457.97	0.71978	1.8115e-05	0.003965	UP
ENSGALG00000004801	14.5531	13.7038	14.9105	11.5122	13.7958	11.8191	30.7142	22.7085	24.2858	19.0732	15.2527	28.2205	1425.19	864.97	0.72043	3.1113e-05	0.0056784	UP
ENSGALG00000004820	3.15903	4.60803	2.16981	2.38016	3.04167	4.36219	7.15787	4.90444	6.9435	5.00965	7.51531	7.43591	89.6146	47.9154	0.90324	0.00028876	0.022171	UP
ENSGALG00000004899	294.867	318.525	307.532	310.05	415.892	260.752	187.948	250.421	244.129	235.317	262.084	159.376	10783.1	16119.2	-0.58002	0.00041301	0.02745	DOWN
ENSGALG00000005043	0.957361	0.54476	0.938884	0.872857	0.816668	1.1336	1.41255	2.04587	1.29407	2.67578	2.95607	2.00367	179.102	80.2442	1.1583	0.00010137	0.012909	UP
ENSGALG00000005156	2.57945	2.42804	2.10085	1.97727	2.55855	2.33604	4.34535	4.12958	4.01129	3.58625	2.96927	4.62989	170.909	106.461	0.6829	0.00088834	0.043604	UP
ENSGALG00000005173	10.1012	8.10637	7.42099	13.3629	12.4769	9.17202	7.01651	4.61819	6.339	5.87393	7.6307	6.77295	195.72	327.915	-0.74453	2.9198e-05	0.005507	DOWN
ENSGALG00000005194	9.71616	1.48637	23.2715	7.57143	4.62864	10.449	0.548351	0.67777	1.97011	0.259092	0.165085	0.194753	17.2103	277.619	-4.0118	0.0002011	0.018495	DOWN
ENSGALG00000005257	4.82845	2.88995	4.96874	3.41573	4.41	4.61505	2.46161	2.5587	3.39586	2.09472	3.36415	2.28633	82.4178	135.655	-0.71891	0.00067593	0.03704	DOWN
ENSGALG00000005321	1.7386	2.35342	1.7046	1.51678	1.4025	1.5928	5.37002	3.51816	2.95596	2.94814	1.97794	5.61949	355.019	173.47	1.0332	0.00080733	0.041433	UP
ENSGALG00000005363	17.7309	17.3707	12.7758	20.4978	22.8462	13.5042	11.8533	11.5697	11.8999	11.2347	15.9094	8.80221	767.944	1186.33	-0.62743	0.00024975	0.020535	DOWN
ENSGALG00000005379	3.01248	2.43037	1.53034	1.78062	3.02498	1.93642	6.07381	4.60231	3.45183	3.45917	3.17387	5.3159	247.376	137.077	0.85172	0.00014186	0.015244	UP
ENSGALG00000005425	88.7102	105.087	88.5238	84.7411	90.558	69.7159	177.133	166.535	133.704	107.013	133.946	129.52	12245.3	8044.22	0.60621	8.7708e-05	0.011525	UP
ENSGALG00000005533	7.74352	6.86686	7.64062	7.72189	9.75819	6.32407	16.0655	13.631	14.5213	9.55711	9.12827	16.8138	622.234	379.866	0.71197	0.00013882	0.015024	UP
ENSGALG00000005646	4.94479	4.36765	3.36136	4.3259	4.87729	3.75658	7.16255	6.34353	7.45623	6.54809	8.32099	7.2965	684.798	429.002	0.67469	0.0001166	0.01393	UP
ENSGALG00000005842	16.6403	21.8766	19.3888	18.0513	21.4783	15.4202	32.3814	30.6019	30.7148	31.0453	24.6638	39.5825	844.547	531.702	0.66756	9.658e-05	0.012455	UP
ENSGALG00000005927	14.5052	16.9045	12.499	13.2083	18.3671	12.2378	35.3775	35.7186	32.4619	22.5367	25.7806	27.7347	501.242	257.641	0.96014	4.7764e-08	8.8779e-05	UP
ENSGALG00000006016	14.9828	15.3693	20.8175	16.8586	17.7135	16.5492	9.42711	9.90323	10.7593	11.9377	11.8956	11.988	1228.36	2014.2	-0.71348	1.021e-05	0.0028288	DOWN
ENSGALG00000006173	13.2035	11.5496	9.77318	16.2906	14.1536	10.5803	7.60933	6.82772	6.51135	8.75453	9.99005	5.41118	216.507	382.128	-0.81964	8.8295e-06	0.0025067	DOWN
ENSGALG00000006198	75.2042	72.8071	46.1163	41.3656	57.5028	52.1476	128.145	116.95	80.3042	80.5222	72.5781	126.129	3951.86	2378.56	0.73244	0.0004114	0.02745	UP
ENSGALG00000006217	37.944	55.7486	62.8691	29.2694	48.8563	46.2521	139.295	100.248	206.875	117.525	69.3062	207.868	3673.72	1300.96	1.4977	6.0251e-05	0.0087141	UP
ENSGALG00000006221	0.767254	0.693639	0.658183	0.611272	0.462864	0.815837	3.08539	1.43805	1.91996	1.36023	0.990511	2.46362	252.103	95.9354	1.3939	5.3684e-05	0.0081218	UP
ENSGALG00000006346	7.5177	11.9711	7.20971	5.54028	7.28365	10.3256	15.1105	10.7023	16.2435	16.7984	14.7405	13.3352	390.933	236.732	0.72367	5.0801e-05	0.0078483	UP
ENSGALG00000006409	3.91788	7.36468	4.06823	4.04904	4.275	6.16057	12.5852	8.35991	7.09806	7.60064	7.34912	9.18854	771.217	466.96	0.72384	0.00017536	0.017234	UP
ENSGALG00000006483	5.3027	8.0282	5.52235	6.50184	4.45939	6.13377	15.8801	7.92434	10.9291	8.84309	10.8849	19.1356	319.485	165.99	0.94465	0.00098487	0.046315	UP
ENSGALG00000006584	3.97728	5.54786	3.67275	4.50404	3.41784	4.16727	12.6801	10.3595	10.8575	7.94449	10.124	14.4537	191.608	77.2203	1.3111	4.6082e-10	3.1295e-06	UP
ENSGALG00000006636	1.73664	0.636332	0.739354	0.841155	0.907414	0.967207	3.13902	3.6982	1.89278	1.06959	3.18037	4.71669	36.3158	12.6353	1.5231	0.00056058	0.032759	UP
ENSGALG00000006638	0.458691	0.435009	0.353805	0.418203	0.501032	0.4959	1.18299	1.37496	0.727841	0.999294	0.621189	1.2458	37.0187	16.8493	1.1356	0.00070363	0.038072	UP
ENSGALG00000006677	20.1459	20.7299	15.4971	14.5192	19.1009	20.0674	36.1361	39.4964	27.1682	25.9247	30.95	32.1084	1217.78	736.078	0.72632	1.0694e-05	0.0028594	UP
ENSGALG00000006728	176.325	162.455	144.164	248.213	217.479	182.237	123.509	124.643	118.916	135.455	177.388	111.347	7799.79	11742.7	-0.59025	0.00028552	0.022107	DOWN
ENSGALG00000006862	15.57	13.1069	9.97798	8.46757	17.3908	10.5986	25.0667	24.0977	20.65	17.7658	19.8096	23.7405	233.168	140.358	0.73226	0.00019051	0.017614	UP
ENSGALG00000006958	1.05085	1.11706	0.908541	0.657769	1.28661	1.23098	3.8738	1.80716	2.82662	1.63563	1.45159	3.3371	148.33	65.9461	1.1694	0.00038993	0.026494	UP
ENSGALG00000006969	2.02915	2.94258	1.95686	2.72281	2.68476	2.10477	5.34869	3.64444	4.03956	4.00535	2.90678	3.53121	252.154	163.908	0.62142	0.00074152	0.039611	UP
ENSGALG00000007014	0.798626	2.0066	1.66603	1.16046	1.15557	1.68384	5.62608	2.26758	3.73559	2.39377	2.9251	4.83108	96.2857	39.9855	1.2678	7.8168e-05	0.010451	UP
ENSGALG00000007075	10.2245	12.2582	8.04376	8.45965	11.7815	7.32607	7.53098	5.83262	4.83267	7.15592	9.63584	5.80175	455.777	683.228	-0.58404	0.00095471	0.045455	DOWN
ENSGALG00000007160	1.66501	2.63088	0.870414	1.46288	2.46523	1.99943	4.54035	3.88274	4.29412	3.00806	2.62981	5.78415	100.786	48.6114	1.0519	6.5683e-05	0.0091542	UP
ENSGALG00000007282	1.1424	0.131558	0.784664	0.221331	0.841804	0.633219	2.79557	2.00311	1.67398	1.06634	0.876695	1.7065	42.8218	16.8915	1.3421	0.00083515	0.042209	UP
ENSGALG00000007286	8.41873	8.64466	8.73942	7.23788	7.84749	7.39872	15.5227	14.2138	11.9156	10.9952	11.1447	16.9583	372.547	235.645	0.66081	0.00030061	0.02274	UP
ENSGALG00000007287	29.9148	31.73	23.2597	19.481	27.1483	23.1122	55.2392	43.587	44.6881	35.2326	27.8451	47.4272	573.395	368.813	0.63664	0.00018736	0.017585	UP
ENSGALG00000007565	2.89823	2.65295	2.01851	2.80756	2.56276	3.90232	5.94811	4.2145	4.90019	3.96058	5.85977	5.09632	130.273	77.5488	0.74836	0.00086429	0.04302	UP
ENSGALG00000007608	1.5701	1.54981	1.50561	1.3037	0.991686	1.76675	3.31619	3.59495	2.31564	2.73528	2.10861	4.31514	79.7592	39.8888	0.99967	8.5463e-05	0.011295	UP
ENSGALG00000007661	4.50748	2.98321	3.51818	4.04023	5.70373	5.03317	11.5691	7.3031	7.45382	7.55833	6.32183	11.0814	319.312	169.911	0.91019	1.6448e-05	0.0038082	UP
ENSGALG00000007675	2.17547	0.911001	3.65841	1.43687	0.961828	2.68285	0.453716	0.325101	0.740957	0.312634	0.227658	0.26857	7.59964	41.4659	-2.4479	0.00012754	0.014685	DOWN
ENSGALG00000008043	1.20256	1.80353	1.17873	1.40876	1.31065	2.2518	3.47888	2.3216	2.7382	2.12205	2.96174	3.53198	98.9647	56.0064	0.82132	0.0007424	0.039611	UP
ENSGALG00000008120	26.5121	23.0086	12.7073	15.4143	14.3241	19.1197	42.281	26.1372	25.938	32.6378	26.6075	37.3681	1287.97	793.276	0.6992	0.00020187	0.018495	UP
ENSGALG00000008150	3.56037	0.473788	4.3722	2.65188	1.14736	4.62555	0.855126	0.741337	0.837895	0.557462	0.746825	0.49424	43.2522	184.504	-2.0928	0.00097165	0.046146	DOWN
ENSGALG00000008217	5.61744	3.59969	3.9885	4.16905	5.44792	4.0441	11.4092	6.81392	7.15115	5.81091	5.9449	9.28949	165.012	101.284	0.70416	0.00091258	0.044157	UP
ENSGALG00000008318	2.71317	2.69291	1.95154	1.68443	2.39912	2.28272	1.37557	1.39221	1.18312	1.24573	1.69101	1.68956	92.7361	156.269	-0.75283	0.00026053	0.020984	DOWN
ENSGALG00000008365	1.97807	2.15804	0.910103	1.61363	1.22744	1.21487	4.10456	3.47981	3.64047	2.47647	1.95743	3.44023	88.9441	44.7446	0.99118	2.9258e-05	0.005507	UP
ENSGALG00000008436	18.3332	24.0153	18.9838	21.1389	22.4029	17.5605	61.687	44.4099	34.0888	29.3491	35.8471	49.6544	1615.45	821.123	0.97626	2.3821e-06	0.0010144	UP
ENSGALG00000008473	4.51116	4.3544	3.73984	3.88211	4.22136	4.83615	8.86449	6.83364	7.21999	5.74324	6.3777	8.188	956.599	598.443	0.6767	7.6821e-05	0.010331	UP
ENSGALG00000008609	24.0825	30.5231	19.1377	15.6248	15.3053	19.5843	54.2132	33.6273	38.7101	28.5639	24.7315	45.1708	2274.38	1333.21	0.77057	0.00059942	0.034204	UP
ENSGALG00000008970	3.76771	2.73537	2.96634	2.27453	2.35384	2.87932	2.06002	1.45861	2.1549	1.24545	2.15284	1.74258	127.855	213.181	-0.73757	0.00016711	0.016929	DOWN
ENSGALG00000009216	3.41462	3.86265	3.87748	3.60052	3.63394	4.23144	8.41139	5.63791	6.85316	5.10439	5.73945	8.49438	214.828	128.192	0.74488	0.00024242	0.020535	UP
ENSGALG00000009268	22.5103	8.85167	9.67409	23.5679	25.7912	6.09647	1.71442	3.32804	3.25689	2.97569	3.00203	7.78202	104.576	478.183	-2.193	5.1142e-05	0.0078483	DOWN
ENSGALG00000009349	0.597262	0.529078	0.301221	0.623082	0.406253	0.422197	1.61615	0.71747	1.23933	1.18278	0.449534	1.55976	47.3897	21.4192	1.1457	0.00079489	0.041017	UP
ENSGALG00000009601	5.41205	7.61517	3.17235	2.82969	3.02665	5.37964	8.71595	5.61188	8.23596	7.31698	9.57183	7.86058	426.352	261.369	0.70596	0.00085557	0.042936	UP
ENSGALG00000009699	35.9763	39.8911	38.176	35.2937	43.2246	27.6082	72.7195	66.3654	58.3245	51.1135	52.8697	72.6387	1721.11	1069.28	0.6867	3.2484e-05	0.0057907	UP
ENSGALG00000009825	2.22284	2.43791	2.01115	1.96287	1.75161	1.86601	5.04174	4.05169	3.68623	3.04603	2.10619	3.71678	231.279	138.689	0.73778	0.00010603	0.013109	UP
ENSGALG00000009859	6.48495	8.3919	8.6413	6.49795	7.92163	9.81038	6.70313	5.87959	5.0986	5.73716	4.82274	3.78287	232.663	366.897	-0.65714	0.0005453	0.032302	DOWN
ENSGALG00000009957	5.67414	6.64568	4.7861	5.12185	4.00533	7.33609	12.8695	8.82389	8.84161	7.87759	8.68412	12.6308	597.889	356.772	0.74487	3.159e-05	0.00572	UP
ENSGALG00000009992	5.136	5.58849	4.64588	5.17395	6.66547	4.27281	4.55981	3.18609	3.37533	3.24583	5.05794	2.71826	366.23	549.769	-0.58608	0.00077567	0.040724	DOWN
ENSGALG00000010127	61.8623	70.9323	63.7245	85.4518	107.383	70.4159	56.6326	51.2653	58.77	55.0467	67.9095	45.6188	2233.71	3223.56	-0.52921	0.00087586	0.043253	DOWN
ENSGALG00000010139	2.36907	2.03375	1.69445	2.04459	2.09485	1.73411	4.08451	3.61114	4.08828	4.66912	1.98334	3.33417	81.9101	47.4799	0.78673	0.00092763	0.044667	UP
ENSGALG00000010221	4.65289	5.12709	3.77694	3.99473	4.04978	4.35963	8.93029	5.71395	6.87267	7.2193	4.99899	9.36639	381.342	243.202	0.64893	0.00038358	0.026331	UP
ENSGALG00000010338	50.8243	11.5425	115.879	30.0113	19.1583	92.1521	5.05831	3.82784	7.28286	3.29237	2.56397	1.37488	37.3037	549.753	-3.8814	0.00022085	0.019519	DOWN
ENSGALG00000010470	3.93206	3.63735	5.73561	3.99638	2.73594	4.90811	8.08421	9.29814	4.12166	14.2658	10.9447	10.3731	288.204	133.319	1.1122	0.00050725	0.031023	UP
ENSGALG00000010507	3.15653	4.10712	4.30034	3.93143	4.05987	4.44882	10.4914	13.5111	11.7545	5.55455	5.52112	13.639	239.255	100.267	1.2547	0.00011312	0.013619	UP
ENSGALG00000010857	4.7462	4.76421	4.46918	5.40908	7.24907	4.82024	3.57129	2.04437	4.15863	3.53073	4.99601	2.75735	133.982	211.278	-0.6571	0.00050291	0.030922	DOWN
ENSGALG00000010866	0.308064	2.44394	1.37858	0.364744	0.181604	0.269616	3.14111	7.68052	2.32546	5.16362	2.75816	2.27768	111.887	24.7648	2.1757	0.00032667	0.024034	UP
ENSGALG00000010988	1.66382	2.30708	1.65379	3.51958	2.28191	2.70431	1.00404	0.976804	0.949884	0.858831	1.01626	0.691672	26.2298	71.182	-1.4403	2.231e-07	0.00021377	DOWN
ENSGALG00000011214	68.4413	79.8323	40.0075	41.9163	33.2639	66.7614	142.901	116.843	101.719	87.3799	99.2234	140.235	6809.65	3458.13	0.97759	6.2744e-07	0.00044493	UP
ENSGALG00000011238	13.9962	12.0287	10.9279	12.2181	9.39934	14.5903	24.451	15.3889	18.1991	15.9131	17.2262	24.3299	807.984	543.909	0.57096	0.0011054	0.049941	UP
ENSGALG00000011524	1.77744	1.54258	1.88194	1.62201	1.7767	0.834163	4.07116	4.67914	3.50014	2.67597	3.23217	2.02895	127.108	62.6623	1.0204	2.8091e-05	0.005507	UP
ENSGALG00000011529	29.5798	28.8829	26.6396	28.4541	34.9356	23.5799	18.6657	17.0441	20.4596	16.3029	23.6327	20.2953	364.39	567.94	-0.64026	0.00016259	0.016692	DOWN
ENSGALG00000011531	5.96714	4.56994	5.28833	4.12688	6.77293	4.39244	4.34378	2.54219	3.64405	3.18931	4.40014	3.13038	234.927	364.078	-0.63204	0.00035444	0.024951	DOWN
ENSGALG00000011759	1.41481	1.05425	3.19595	3.78917	2.35492	3.20485	1.10315	1.09446	1.41352	0.977311	0.958017	0.452073	11.6774	31.0733	-1.412	0.00086147	0.042992	DOWN
ENSGALG00000011796	75.021	75.4155	42.8005	10.8911	30.9238	33.7359	109.827	125.452	101.196	107.08	106.04	130.514	2130.23	885.783	1.266	9.2407e-09	2.3611e-05	UP
ENSGALG00000011856	131.668	142.55	173.5	184.959	171.672	174.385	111.629	106.66	106.025	109.839	88.7215	91.7807	682.412	1148.61	-0.75117	1.009e-05	0.0028288	DOWN
ENSGALG00000011982	12.366	13.8968	14.2182	16.1305	14.0076	10.0762	8.54347	7.55276	6.62464	8.14665	13.4739	7.58576	394.448	647.697	-0.71549	3.0123e-05	0.0055416	DOWN
ENSGALG00000012166	18.7402	19.907	22.5253	25.1032	31.3257	22.7904	17.4647	12.4418	12.9767	11.59	24.4462	12.4885	467.132	758.477	-0.69928	0.00014473	0.01548	DOWN
ENSGALG00000012187	2.80987	3.70555	2.71669	2.87563	3.88724	2.06254	1.57114	1.37824	0.996138	1.28957	2.26938	0.923176	60.2126	135.737	-1.1727	1.9227e-07	0.00020097	DOWN
ENSGALG00000012219	1.2449	1.23512	0.412586	0.352509	0.795965	0.972195	2.06999	1.7788	2.16223	1.41864	2.0283	1.63855	93.6836	44.5281	1.0731	8.4012e-06	0.0024149	UP
ENSGALG00000012290	0.878997	1.66161	1.07183	1.15675	0.99723	1.2628	3.34825	2.7808	2.65114	2.05244	1.71821	3.19814	153.461	72.472	1.0824	3.7296e-07	0.00030631	UP
ENSGALG00000012321	6.0669	6.80811	4.47956	5.12637	6.14781	5.9492	11.2883	9.93659	9.42383	8.6805	9.30318	11.2757	437.813	266.454	0.71643	6.8301e-05	0.0094051	UP
ENSGALG00000012421	13.1773	11.1873	14.6844	12.2681	12.6726	11.8133	9.15342	7.22042	10.2503	8.16716	8.89453	5.31179	247.157	405.239	-0.71335	0.00011805	0.013993	DOWN
ENSGALG00000012747	22.2443	29.8945	27.1106	22.1225	21.2818	17.3936	40.11	31.9578	28.9412	53.528	41.1375	35.1597	1641.69	1051.93	0.64215	0.00051469	0.031312	UP
ENSGALG00000012836	19.9357	21.496	16.3994	15.37	16.1756	22.7733	41.7959	38.2328	33.0092	26.8774	20.8857	30.4186	828.681	513.987	0.68908	0.0001124	0.013619	UP
ENSGALG00000012877	12.0432	11.5242	11.8294	12.6693	12.9987	9.06027	5.1722	8.33857	6.68835	7.60579	10.8443	7.49779	217.651	347.442	-0.67476	0.00020462	0.018672	DOWN
ENSGALG00000013042	1.04142	1.21962	0.777031	0.923347	1.23304	1.12772	0.431945	0.377205	0.317431	0.526172	0.792433	0.407495	26.1959	61.0498	-1.2206	1.2563e-05	0.0032596	DOWN
ENSGALG00000013086	4.00253	2.72367	5.35553	4.38086	2.71188	4.41286	2.62356	1.83714	2.85633	2.60601	1.91477	2.61182	89.8735	156.407	-0.79933	0.0006383	0.035627	DOWN
ENSGALG00000013253	5.3267	5.58409	6.44111	4.29568	4.26383	5.13519	12.8843	12.3343	9.98629	7.40885	5.8827	12.8394	1101.1	591.092	0.89749	0.00013027	0.014685	UP
ENSGALG00000013598	5.16872	5.64305	4.96689	5.13707	5.93564	5.46361	8.41859	13.1862	9.32199	8.2465	8.65432	8.56876	136.74	82.2541	0.73327	0.00047185	0.029964	UP
ENSGALG00000013703	0.556548	1.86171	0.397163	0.385098	0.421824	0.487088	1.59433	1.52479	1.27094	1.65185	2.01349	2.19539	62.6877	26.3226	1.2519	0.00016597	0.016929	UP
ENSGALG00000013865	10.7773	13.1697	9.37857	12.5588	10.7648	7.63343	6.52884	6.19416	5.29158	5.21279	5.52054	7.83663	224.829	416.668	-0.89007	9.7508e-07	0.00057495	DOWN
ENSGALG00000013869	9.13374	6.77208	8.0158	7.61169	8.2314	5.12479	3.80175	6.45824	5.85023	3.82015	4.52249	3.53416	182.06	306.874	-0.75323	0.00013421	0.014767	DOWN
ENSGALG00000013907	2.05825	2.77728	1.50914	2.014	2.14173	2.30175	5.42682	4.37454	3.4792	3.47435	3.07531	4.89847	384.446	210.073	0.87189	1.5514e-06	0.00084943	UP
ENSGALG00000013948	2.62889	5.45599	2.73286	2.88247	1.68597	2.78117	5.30207	5.4137	4.7623	5.32353	3.82429	6.35541	173.898	107.584	0.69278	0.0010312	0.047711	UP
ENSGALG00000014012	38.3751	30.1275	23.9959	25.9732	30.8658	21.3784	37.1388	41.2828	55.055	46.5461	43.0931	48.3838	1219.06	806.386	0.59623	0.00033359	0.024048	UP
ENSGALG00000014071	1.03433	1.04453	0.938974	1.47984	1.5267	1.07237	0.697683	0.732427	0.707472	0.75465	0.805978	0.767139	91.0298	152.175	-0.74132	0.0003365	0.024182	DOWN
ENSGALG00000014331	40.5007	50.0412	30.3014	29.8554	29.7261	34.1634	64.2528	70.1536	54.9497	53.0119	57.0243	46.6472	2527.6	1651.22	0.61423	5.7358e-05	0.0083481	UP
ENSGALG00000014555	401.354	467.867	456.112	375.408	414.426	400.876	197.826	223.125	322.768	357.14	262.054	281.03	4772.17	7694.95	-0.68927	2.1835e-05	0.0045747	DOWN
ENSGALG00000014652	18.5064	17.5342	15.9305	16.4763	16.8169	14.7861	33.9112	26.6811	25.7639	26.1889	21.7615	36.3326	1454.92	902.327	0.68922	3.8113e-05	0.0063875	UP
ENSGALG00000014754	44.9655	29.4464	45.1559	40.6447	28.2805	39.5614	18.4845	19.6502	29.0268	26.2444	21.5974	21.071	278.922	495.341	-0.82856	1.2616e-05	0.0032596	DOWN
ENSGALG00000014914	4.21624	5.9461	6.61034	3.5516	7.64553	3.85047	3.08407	2.76228	2.7472	4.22257	3.23562	2.9458	100.858	177.618	-0.81646	0.000857	0.042936	DOWN
ENSGALG00000015089	2.12222	2.74017	1.38538	2.18042	1.30792	1.96992	7.2785	4.38716	5.20432	5.63491	3.1092	7.07391	81.9988	31.1316	1.3972	7.0856e-08	9.695e-05	UP
ENSGALG00000015419	5.4217	5.21616	3.72822	4.58726	6.18989	4.68497	10.2865	7.22016	9.25643	8.86508	7.03106	9.87897	123.696	74.0633	0.73997	0.00095013	0.04533	UP
ENSGALG00000015461	11.1207	6.64851	16.0893	10.5436	12.3442	13.9987	8.68521	7.19559	6.80816	5.51435	5.33844	8.09718	142.216	256.929	-0.85329	0.00026218	0.020984	DOWN
ENSGALG00000015496	90.4655	88.7006	68.1047	91.531	102.804	89.0043	60.9893	43.1183	51.5799	45.0975	105.889	57.9572	1626.03	2499.15	-0.62008	0.00056128	0.032759	DOWN
ENSGALG00000015662	10.2666	9.31224	12.1405	13.2477	18.9626	11.2749	7.35594	7.88441	10.0591	8.6294	7.0726	6.08277	192.708	323.545	-0.74755	0.00025397	0.02071	DOWN
ENSGALG00000015681	2.57886	3.4741	3.69149	2.87526	4.76149	3.44938	1.48838	1.93298	1.78248	1.69952	3.22997	2.02635	121.737	219.147	-0.84813	1.248e-05	0.0032596	DOWN
ENSGALG00000016173	3.29566	2.89341	4.55378	2.59197	3.40469	3.8553	1.99624	2.27965	2.99923	1.59167	2.14101	1.86109	63.9227	108.329	-0.76102	0.00089031	0.043604	DOWN
ENSGALG00000016205	15.8462	14.4679	14.1324	20.8547	20.3203	11.5479	10.9432	9.96283	12.1734	9.40969	11.4824	8.40188	159.939	262.737	-0.7161	0.00019072	0.017614	DOWN
ENSGALG00000016431	10.2467	1.14867	14.9055	6.28067	3.20729	6.15049	0.970811	1.26701	1.8572	0.532422	0.313146	0.123141	18.1121	160.819	-3.1504	0.00045403	0.029164	DOWN
ENSGALG00000016608	0.8011	1.33674	1.11784	1.07695	1.35892	1.44516	3.20062	1.96188	2.10708	2.05279	1.148	2.37559	126.645	74.5669	0.76418	0.00082422	0.041914	UP
ENSGALG00000016687	1.49129	1.03945	1.87462	1.10249	1.14516	1.85471	0.960356	0.322558	1.09784	0.638102	0.361403	0.586232	16.2279	37.2957	-1.2005	0.00040574	0.027203	DOWN
ENSGALG00000016805	257.866	327.019	289.017	288.146	369.3	252.16	163.131	202.569	145.66	208.739	243.899	116.597	4912.53	8510.53	-0.79278	1.6335e-06	0.00087358	DOWN
ENSGALG00000016979	7.86649	8.44427	4.02605	3.26588	4.62073	8.92552	12.1173	9.65223	10.7784	8.88238	10.2196	10.8734	359.738	225.855	0.67155	0.0004354	0.028526	UP
ENSGALG00000017183	2.59152	1.44245	2.73069	1.71547	1.56589	2.07908	0.418378	0.603505	0.819896	0.526715	0.79551	0.498563	27.5512	96.6098	-1.8101	6.8045e-10	3.1295e-06	DOWN
ENSGALG00000017184	0.579463	0.519015	1.14578	2.49482	1.42331	0.619841	0	0.0529191	0.192977	0.0581597	0.29646	0	1.51713	18.0586	-3.5733	6.1752e-05	0.0088202	DOWN
ENSGALG00000017524	124.313	123.053	137.029	159.948	111.823	112.925	82.4397	71.7108	82.5509	74.5113	79.2613	79.5588	1629.81	2825.43	-0.79377	1.4229e-06	0.00079806	DOWN
ENSGALG00000018318	8.93354	10.2878	18.2113	20.3625	13.9403	7.81858	22.5043	34.5536	25.726	31.3298	31.4558	17.8407	50.6453	26.001	0.96186	0.00072938	0.039189	UP
ENSGALG00000018977	16.9973	7.44979	40.8694	16.7113	13.3474	47.1811	5.30274	3.54473	7.35029	2.40621	1.02211	1.37804	26.6531	194.84	-2.8699	0.00044239	0.028738	DOWN
ENSGALG00000019063	3.87484	8.6032	2.4679	1.71165	2.08321	3.22846	7.68055	10.1404	6.31795	8.34448	10.8835	7.03005	264.3	120.637	1.1315	0.00017342	0.017115	UP
ENSGALG00000019322	1.40911	0.683251	3.33425	1.22134	0.327896	3.50501	0.151239	0.121913	0.0740957	0	0.0853717	0	0.937599	24.6033	-4.7137	5.5703e-05	0.0082301	DOWN
ENSGALG00000021136	9.78019	2.35342	22.6958	7.63594	2.45245	20.5685	0.744191	0	0.291678	0.395578	0	0	1.54728	78.2119	-5.6596	7.2011e-06	0.0022079	DOWN
ENSGALG00000021443	3.63423	3.06011	3.2209	3.70981	2.90258	2.97545	15.9379	10.021	9.52623	5.08312	3.55369	10.242	223.652	85.5211	1.3869	0.00048127	0.030239	UP
ENSGALG00000021450	74.5059	74.4878	75.8185	97.5105	99.4433	54.5998	66.2122	47.344	53.9163	50.0157	63.2228	45.3918	825.82	1275.14	-0.62676	0.00017043	0.017031	DOWN
ENSGALG00000021529	2.90409	4.17009	3.45882	2.67431	2.82157	2.66716	6.28776	8.48686	4.7999	5.08468	4.04459	6.52421	159.717	89.2224	0.84004	0.00022916	0.019859	UP
ENSGALG00000022866	1.37072	1.77941	1.30719	1.27955	1.4104	1.33052	0.863987	0.573553	0.697182	0.652865	1.17623	0.406131	28.3137	58.1118	-1.0373	0.00029316	0.022323	DOWN
ENSGALG00000023066	42.9472	39.4317	29.4257	21.8419	18.8642	19.8762	77.7275	130.261	68.909	70.6529	51.0765	44.1852	3093.85	1264.74	1.2906	0.00053016	0.031915	UP
ENSGALG00000023510	54.1688	54.8111	42.3113	35.0758	31.7625	52.53	73.6623	82.1021	76.0663	66.0926	63.3506	66.0443	2404.39	1608.54	0.57992	0.0001895	0.017614	UP
ENSGALG00000023542	5.9765	5.55429	4.10009	2.4123	2.38739	3.99177	7.32326	7.82073	9.61125	5.68279	6.66848	5.98025	266.316	159.658	0.73815	0.00047429	0.029964	UP
ENSGALG00000024379	2.13485	2.08025	2.03801	1.7499	1.88774	3.0182	5.98609	3.84679	3.5685	3.48603	3.82801	3.95841	96.8944	53.8772	0.84674	0.00036156	0.025272	UP
ENSGALG00000025733	5.34535	2.58141	2.58404	1.33629	3.50685	1.05637	14.4168	9.77895	5.51272	4.67277	4.76374	9.36639	45.2781	16.2121	1.4817	0.00078631	0.040725	UP
ENSGALG00000025996	2.63686	3.52116	2.18074	2.28263	2.72852	2.57782	1.74474	0.899194	1.31722	1.34299	1.51768	1.06663	45.3232	96.8699	-1.0958	7.8341e-06	0.0023395	DOWN
ENSGALG00000026039	175.491	250.257	191.033	194.627	156.525	205.161	92.9319	121.419	114.468	134.502	99.1182	97.8399	916.617	1714.64	-0.90352	1.6821e-07	0.00018933	DOWN
ENSGALG00000026276	6.68319	4.2616	4.50073	4.60143	3.71182	8.36275	8.89811	11.9394	9.54655	9.72908	16.7851	9.07574	194.079	99.8331	0.95905	0.00038715	0.026418	UP
ENSGALG00000026446	1.33168	1.26685	1.13882	0.841315	1.07514	0.962785	3.89634	2.28424	2.08245	2.19664	1.86617	3.61682	44.3558	19.5422	1.1825	0.0002081	0.018915	UP
ENSGALG00000026558	20.99	19.3785	24.0389	18.5943	23.3227	20.1487	45.3989	32.9152	33.4469	27.1222	26.3876	45.0337	1720.71	1097.41	0.6489	0.00015013	0.015697	UP
ENSGALG00000026631	26.8582	30.5235	18.0293	19.2816	23.1701	23.7267	43.3131	39.0977	35.2411	41.1943	31.0912	41.1266	742.771	479.412	0.63165	0.00014983	0.015697	UP
ENSGALG00000026887	13.4077	6.53239	17.1464	18.2335	9.1198	12.8626	3.41771	2.96693	4.63687	6.28858	4.15529	1.75073	14.6179	51.707	-1.8226	2.4889e-06	0.0010406	DOWN
ENSGALG00000027148	2.82159	2.52725	2.64277	0.911106	2.49499	1.64629	8.63092	7.98807	3.75867	6.79675	3.96978	11.9209	22.2476	7.10736	1.6463	0.00024821	0.020535	UP
ENSGALG00000027209	2.18959	1.34481	5.60559	1.90898	1.74253	3.51325	0.520934	0.479911	0.875035	0.527438	0.168033	0.297346	6.364	38.7233	-2.6052	0.00023968	0.020535	DOWN
ENSGALG00000027372	6.37794	6.66941	5.35576	6.67553	5.85578	6.62989	14.3019	8.91768	8.49613	8.4543	7.7075	12.8757	400.771	262.955	0.60796	0.00087357	0.043253	UP
ENSGALG00000027418	57.5395	55.1978	73.0469	65.5665	59.897	55.9483	25.8865	47.778	48.4776	56.5338	29.9047	29.229	722.975	1173.18	-0.69841	0.00045678	0.029259	DOWN
ENSGALG00000027501	4305.17	3735.39	5837.99	4838.75	4791.87	4058.12	4092.62	3247.63	3021.88	3484.19	3449.77	2566.08	226218	332953	-0.55761	0.00067903	0.03709	DOWN
ENSGALG00000027513	1.82105	2.65633	1.30766	1.41126	1.44924	2.49691	9.16018	5.83734	3.51747	5.3736	4.75151	4.86351	88.9704	31.3573	1.5045	3.0639e-07	0.00026095	UP
ENSGALG00000027899	191.612	225.243	329.112	256.754	251.116	260.316	110.562	174.186	152.08	171.35	146.467	135.51	1056.1	1893.32	-0.84217	2.896e-06	0.0011684	DOWN
ENSGALG00000027907	7.62908	5.56761	7.39485	6.57403	7.45199	6.21109	16.1004	11.3379	12.4524	11.419	8.16933	10.3602	254.203	157.597	0.68974	0.00023097	0.019893	UP
ENSGALG00000028015	49.4746	51.9668	35.9896	37.7061	25.7193	48.1041	76.5409	53.086	79.9843	68.2602	51.043	71.93	908.479	598.502	0.6021	0.00024636	0.020535	UP
ENSGALG00000028059	32.2849	19.6035	23.6412	16.4904	30.6241	20.5495	104.142	75.2644	59.2324	54.615	39.1911	36.6684	101.409	41.6423	1.2841	0.00011894	0.014027	UP
ENSGALG00000028140	4.727	7.12244	2.73093	3.85159	3.28138	4.91032	15.6305	6.97159	10.5046	6.86387	7.22125	10.5587	209.864	102.823	1.0293	0.00027104	0.021273	UP
ENSGALG00000028145	459.634	487.988	696.087	656.965	616.105	557.874	244.257	357.626	354.003	385.142	406.734	253.933	3612.75	6607.66	-0.87104	2.914e-07	0.00025774	DOWN
ENSGALG00000028191	12.0237	11.61	8.34597	8.90859	10.0006	9.24833	18.3168	16.1031	13.8103	22.6253	11.0135	22.5336	592.675	359.59	0.72089	0.00061024	0.034564	UP
ENSGALG00000028256	24.8757	19.4489	25.4978	19.343	26.9563	33.8039	7.77083	11.9768	24.8529	15.3108	15.8967	17.5529	497.564	842.208	-0.75929	0.00063103	0.035378	DOWN
ENSGALG00000028437	45.2146	45.0187	64.0483	48.8002	59.6176	47.3107	32.0674	30.6839	40.336	33.8671	32.8407	36.0256	833.433	1326.98	-0.67101	4.2064e-05	0.006812	DOWN
ENSGALG00000028565	10.1066	12.5801	8.17845	10.3124	11.286	13.7069	25.7246	16.3388	18.7655	17.9401	17.3227	23.0344	1034.5	608.161	0.76641	8.037e-06	0.0023395	UP
ENSGALG00000028801	7.19905	6.60902	8.05771	8.60578	10.0402	7.09674	13.2493	14.2249	11.6919	10.1248	11.1442	15.4041	1094.49	724.443	0.59531	0.0005776	0.033289	UP
ENSGALG00000029245	11.9672	11.0991	10.2308	5.5241	8.80651	5.76402	28.3351	29.5083	23.1101	26.9891	10.9097	43.0826	326.941	113.638	1.5246	2.5443e-05	0.0050438	UP
ENSGALG00000029278	2.90956	3.23097	4.37973	1.61059	2.94032	2.81926	8.79407	4.44121	8.30542	4.6933	6.69854	9.87792	66.3135	29.5317	1.167	3.8332e-05	0.0063875	UP
ENSGALG00000029301	3.15552	3.9367	3.32498	2.16523	3.95288	3.18362	8.8927	6.48395	6.1739	6.76976	6.2558	6.24922	150.505	76.7633	0.97132	4.9674e-06	0.0017574	UP
ENSGALG00000029369	37.6504	43.6003	52.2722	44.0049	46.2268	35.2028	25.0008	26.5344	35.1394	27.3138	30.8632	30.2964	2428.63	3792.78	-0.64312	6.5359e-05	0.0091542	DOWN
ENSGALG00000029371	1.24543	2.74373	0.963627	1.10155	1.67584	0.995207	3.69919	2.80388	3.51645	2.93481	2.36862	4.26497	58.4622	27.3477	1.0961	9.6359e-05	0.012455	UP
ENSGALG00000029402	22.2389	25.1711	17.711	18.1947	20.721	26.2922	38.3019	38.3745	36.4383	35.5627	22.4985	33.3411	1304.4	876.288	0.57391	0.00032961	0.024034	UP
ENSGALG00000029444	15.6884	13.7732	17.2083	13.8107	15.0856	13.5999	30.7154	26.2549	23.1534	20.8262	17.6816	26.9752	789.469	512.194	0.62419	0.00021571	0.019377	UP
ENSGALG00000029514	3.98206	3.34153	3.10808	2.61651	2.94793	1.83709	6.35787	4.61762	5.67463	4.57299	4.31735	5.23994	322.083	197.548	0.70523	9.695e-05	0.012455	UP
ENSGALG00000029528	20.0168	22.6875	14.7056	12.5871	12.0348	18.1898	45.5116	21.2729	30.486	25.7841	23.9247	33.0849	1925.2	1140.26	0.75565	0.00047682	0.030041	UP
ENSGALG00000029532	5.91945	6.32989	18.811	7.78222	3.73877	13.8768	1.07779	2.60642	1.68972	1.14581	0.973433	1.14837	6.68221	46.3582	-2.7944	0.00018619	0.017585	DOWN
ENSGALG00000029601	1.39784	0.762508	1.30925	0.783956	1.69142	1.99604	3.60069	5.38173	2.20509	2.85766	5.2507	3.19706	49.7406	18.4626	1.4298	5.4636e-05	0.0082118	UP
ENSGALG00000029638	1.50157	0.963094	0.76551	0.773326	1.44541	0.815112	2.20935	2.35897	2.65856	1.95731	2.62555	3.38132	129.515	56.0776	1.2076	2.4967e-07	0.00022965	UP
ENSGALG00000029652	14.4123	15.4534	10.3189	10.829	13.2546	11.522	21.7131	27.5261	22.6139	19.4239	17.7602	26.723	954.422	559.883	0.7695	4.0823e-06	0.0015141	UP
ENSGALG00000029655	0.992652	0.630693	0.737382	0.630012	0.514545	0.718977	2.44309	2.84151	1.60731	1.26772	0.748644	2.09175	52.1126	21.1824	1.2988	0.00049591	0.030814	UP
ENSGALG00000029687	455.368	650.699	623.477	791.928	684.679	573.337	285.701	398.962	431.947	431.409	464.82	407.566	15604.4	25635.2	-0.71617	7.1416e-06	0.0022079	DOWN
ENSGALG00000030164	167.994	168.082	175.889	220.905	158.123	179.764	107.559	120.503	117.412	112.48	86.4303	87.1102	1874.22	3356.45	-0.84065	6.7571e-07	0.00045702	DOWN
ENSGALG00000030220	17.4816	16.3139	14.0108	11.3263	14.3856	13.8986	27.9325	23.8987	20.8262	19.6771	18.2992	28.9007	1395.52	924.075	0.59472	0.00033976	0.024264	UP
ENSGALG00000030374	8.1873	7.96769	4.48225	5.2502	5.65914	4.59196	17.4015	13.2216	11.1176	7.34362	10.8848	11.5881	200.188	106.916	0.90489	3.7777e-05	0.0063875	UP
ENSGALG00000030385	0.695101	0.34306	0.341025	0.384774	0.526837	0.173814	2.76748	1.4963	2.67865	0.597995	2.36234	1.39344	54.8065	12.691	2.1105	4.2731e-06	0.0015597	UP
ENSGALG00000030492	5.12199	3.6195	3.59803	2.02981	2.88216	7.33538	6.76554	11.6728	11.2813	11.2514	6.56605	9.80111	80.265	36.2404	1.1472	4.8186e-05	0.007695	UP
ENSGALG00000030580	7.09429	7.40975	8.03543	10.2819	10.8442	7.74906	6.05598	4.86664	6.44677	5.29891	8.29302	3.85858	307.244	479.103	-0.64095	0.00024402	0.020535	DOWN
ENSGALG00000030671	0.769597	0.402846	0.458706	1.01662	0.783624	0.632726	3.16259	0.900899	3.79786	1.72744	1.23489	2.88196	94.2613	29.7907	1.6618	0.0005727	0.033173	UP
ENSGALG00000030741	0.960542	1.4339	0.899666	0.964954	0.566239	0.965202	4.67933	2.45618	2.45247	2.4102	1.26951	3.76829	77.0064	27.8865	1.4654	4.4188e-05	0.007106	UP
ENSGALG00000030788	0.671989	0.429921	0.349667	0.650966	1.05637	0.914855	3.12137	1.71833	1.64113	1.55127	0.773544	2.73767	24.8691	9.28002	1.4222	0.00083179	0.042132	UP
ENSGALG00000030857	20.3858	15.9384	19.5092	18.9925	20.6766	18.4171	39.4356	29.6395	26.9677	25.9437	24.4349	30.8821	1872.57	1274.97	0.55456	0.00075372	0.040029	UP
ENSGALG00000030884	1.12091	1.45739	0.474136	0.980762	1.08708	0.443039	2.06462	1.93175	2.16752	1.69845	1.74816	1.86591	51.3869	26.118	0.97635	0.00060135	0.034229	UP
ENSGALG00000030889	6.72202	5.53401	4.82247	4.93228	5.91865	7.3601	10.3539	12.1079	8.80206	10.8781	6.38787	11.8476	342.801	210.942	0.70053	0.00014654	0.015529	UP
ENSGALG00000030890	165.479	266.076	241.993	229.937	170.095	227.264	123.563	154.884	165.925	177.547	144.196	147.867	2729.69	4099.49	-0.58671	0.00048914	0.030566	DOWN
ENSGALG00000030904	18.9271	18.9631	14.8643	17.4108	16.3701	18.0182	38.6014	24.3893	25.7282	25.9318	22.1147	33.2561	6754.81	4403.85	0.61715	0.00013318	0.014767	UP
ENSGALG00000031041	1.237	0.777012	0.912841	0.980429	0.563482	1.18104	3.01943	2.31072	2.58409	1.55759	0.906146	3.15606	58.264	25.9193	1.1686	0.00043192	0.028378	UP
ENSGALG00000031090	0.672578	0.789723	1.40813	1.22642	1.06118	1.22344	0.336167	0.476929	0.948652	0.547985	0.36434	0.716358	41.7494	83.1503	-0.99397	0.00033895	0.024264	DOWN
ENSGALG00000031505	5.92491	7.28049	3.93729	5.09826	3.65859	2.69411	9.75368	11.8888	11.1445	7.92343	6.82031	10.3834	283.919	147.541	0.94437	5.8734e-06	0.001881	UP
ENSGALG00000031511	18.3081	19.6697	16.3354	16.4944	19.4338	17.4946	35.7294	35.3161	23.664	24.6261	23.9781	28.6315	2087.15	1379.13	0.59778	0.00017834	0.017327	UP
ENSGALG00000031615	0.870901	0.644736	0.174794	0.180783	0.275033	0.544434	2.21999	1.2271	1.80235	1.40482	0.358041	1.43611	21.8614	7.3751	1.5677	0.00026732	0.021053	UP
ENSGALG00000031635	14.5764	14.2166	15.391	15.0497	19.5274	17.6119	13.6931	9.35827	10.6879	9.83294	14.1148	8.77877	514.624	789.696	-0.61778	0.00021688	0.019406	DOWN
ENSGALG00000031762	74.1477	90.8969	96.2546	73.5858	104	68.5028	58.0269	58.7063	74.6566	58.9323	50.1296	54.5462	697.634	1050.96	-0.59116	0.00054444	0.032302	DOWN
ENSGALG00000031853	229.823	295.365	289.855	252.546	224.558	281.477	152.954	189.312	216.126	194.494	167.241	164.069	1043.68	1598.57	-0.6151	0.00032155	0.023977	DOWN
ENSGALG00000031952	9.69236	11.9526	13.4384	11.1635	12.2146	13.559	5.29147	6.08452	7.0148	7.16965	11.0693	9.63844	98.3779	161.65	-0.71647	0.00025342	0.02071	DOWN
ENSGALG00000031991	3.3251	2.9983	3.70198	4.67967	5.38115	2.71793	1.6632	2.70718	3.13401	2.32354	2.23879	1.91694	72.5427	124.059	-0.77412	0.00052107	0.03145	DOWN
ENSGALG00000032146	1.05944	0.720026	1.31764	0.8917	1.13646	0.486409	3.11675	2.78362	1.87401	1.69437	1.55942	3.01894	130.776	55.3629	1.2401	7.9833e-06	0.0023395	UP
ENSGALG00000032190	52.5632	48.1755	42.1517	36.7849	34.6676	47.568	86.0005	75.883	71.193	54.7256	53.5984	90.2742	5152.96	3311.95	0.63772	0.00012163	0.014198	UP
ENSGALG00000032257	46.5287	33.8648	32.503	30.5731	39.1763	35.2838	61.7321	56.2325	47.6852	58.6443	53.2352	59.0148	1544.38	1054.94	0.54986	0.0008765	0.043253	UP
ENSGALG00000032609	0.685844	0.676982	0.688262	0.822575	0.707533	0.471622	1.94807	0.75161	3.01821	1.26857	1.69177	2.52801	110.417	42.4611	1.3788	0.00051755	0.03132	UP
ENSGALG00000032662	0.918002	0.989686	0.786646	0.681153	1.03627	0.991466	2.82798	1.68564	2.04898	1.46441	1.28157	3.36858	104.55	47.2094	1.147	0.00042419	0.028112	UP
ENSGALG00000032856	1.7678	1.03955	1.42677	1.20239	1.56317	1.66238	3.35571	2.48862	3.4384	1.80073	3.76683	3.75422	159.683	78.8536	1.018	5.1779e-06	0.0018041	UP
ENSGALG00000032874	38.3649	39.2429	46.9249	54.8179	60.6644	37.4282	30.8917	30.0489	31.2838	41.4338	33.317	32.3322	573.168	840.048	-0.55152	0.00099659	0.046581	DOWN
ENSGALG00000033039	14.9422	19.703	9.21441	8.61854	9.37996	15.8725	39.9205	24.6797	30.6547	22.8479	21.402	30.7856	962.326	465.546	1.0476	7.6493e-07	0.00048793	UP
ENSGALG00000033152	0.32942	0.0948393	0.0771356	0	0	0.288306	1.00766	1.28609	0.822794	0.148785	0.284402	1.11837	9.18322	1.65221	2.4746	0.00097895	0.046146	UP
ENSGALG00000033157	3.0141	3.29366	2.10185	1.76893	1.80923	3.10004	5.69787	3.68889	4.0664	4.55104	3.21635	4.86992	191.451	117.345	0.70622	0.0003296	0.024034	UP
ENSGALG00000033195	26.7215	26.3578	23.8487	25.0995	29.9376	23.6069	50.6975	43.2128	35.6985	37.1547	35.5267	49.7767	1457.26	949.519	0.61799	0.00022542	0.019785	UP
ENSGALG00000033336	1.30719	1.21533	1.19065	1.04556	1.15588	1.30148	2.28663	3.30206	1.84516	2.12328	1.64279	3.01288	192.781	102.995	0.90439	0.00011279	0.013619	UP
ENSGALG00000033530	1127.95	1461.1	1318.09	1579.23	1287.39	925.559	731.613	826.198	753.95	555.666	705.53	894.43	13269.9	24133.9	-0.8629	9.0065e-08	0.00011506	DOWN
ENSGALG00000033570	19.4724	21.3466	19.4857	19.4908	24.3796	20.3812	43.5627	36.5949	31.0338	23.8973	23.3681	36.4635	875.022	590.979	0.56621	0.0008023	0.041275	UP
ENSGALG00000033633	21.9506	39.0076	38.9017	40.1095	42.5113	41.9629	26.375	21.3669	22.7045	32.5028	23.9797	32.5559	600.29	891.912	-0.57124	0.00054865	0.032351	DOWN
ENSGALG00000033656	75.0177	72.0463	98.2411	72.3638	91.6406	66.3346	54.839	57.9725	54.7314	68.8954	58.6826	50.3558	3538.92	5138.91	-0.53815	0.001067	0.048781	DOWN
ENSGALG00000033789	134.41	162.647	83.3098	67.9883	68.2394	89.2292	200.208	198.654	191.008	152.575	155.769	122.353	8185.23	5124.3	0.67567	0.00072213	0.03889	UP
ENSGALG00000033807	73.3842	82.7937	79.6833	84.289	86.7833	70.9054	46.6183	52.1452	63.9431	62.6903	46.8445	54.2012	1423.38	2194.38	-0.62449	0.00017182	0.017031	DOWN
ENSGALG00000033857	162.055	124.466	217.122	246.784	211.605	171.39	103.861	84.1616	155.759	156.476	120.72	130.607	1820.89	2905.9	-0.67434	0.00091401	0.044157	DOWN
ENSGALG00000033894	543.306	530.675	884.212	759.444	787.85	534.228	328.927	460.663	366.735	509.404	571.136	372.385	3808.66	6212.41	-0.70587	0.00075604	0.04006	DOWN
ENSGALG00000033931	1.80268	0.631813	1.17456	0.911106	0.970274	1.37191	4.31546	2.8989	2.34917	3.75237	2.25556	3.93814	40.2181	15.0337	1.4196	2.9456e-05	0.005507	UP
ENSGALG00000034025	1.18994	1.87785	1.07324	0.896552	0.818378	1.27285	3.32532	2.10095	3.03816	2.66731	2.13075	4.24929	64.1401	27.6632	1.2133	1.4575e-05	0.003666	UP
ENSGALG00000034044	20.9238	25.4663	19.018	18.1708	29.4051	15.2707	13.6647	12.639	14.1504	14.3637	20.2497	12.7687	597.849	917.019	-0.61717	0.00044723	0.02897	DOWN
ENSGALG00000034050	68.5741	65.8798	55.7755	55.1758	60.7747	53.5112	38.7808	43.401	39.2785	39.8574	44.9684	36.8507	1263.46	1968.72	-0.63988	0.00013916	0.015024	DOWN
ENSGALG00000034118	4.30369	4.27789	2.80044	1.84316	1.96285	4.08374	9.19204	5.58518	5.61229	6.01552	5.21482	6.76717	136.611	72.8572	0.90693	2.1883e-05	0.0045747	UP
ENSGALG00000034132	4.5873	3.03475	3.71761	2.99404	3.45219	3.41683	6.0706	5.21437	6.27332	7.20018	5.20566	6.40625	181.125	111.628	0.69829	0.0005717	0.033173	UP
ENSGALG00000034134	2.09044	5.15057	3.85519	4.41113	4.41339	3.4747	8.09627	7.9382	6.02271	5.62104	5.44694	7.04198	401.414	246.496	0.70353	6.7956e-05	0.0094051	UP
ENSGALG00000034140	4.0858	4.21226	3.31661	4.44801	6.60639	4.22293	10.6332	7.73984	5.48162	7.73302	6.22623	7.02809	186.171	117.597	0.66278	0.0010122	0.047094	UP
ENSGALG00000034297	4.68165	6.62096	3.6772	3.54858	4.70624	5.46314	12.6792	10.1937	9.89631	8.41348	7.65829	9.83763	577.275	297.999	0.95395	3.4837e-08	7.2829e-05	UP
ENSGALG00000034426	0.652823	1.04596	1.14315	0.769878	1.75688	1.11785	2.63361	1.6097	1.78653	2.61521	2.09108	1.85015	71.6424	38.9088	0.88072	0.00090351	0.043926	UP
ENSGALG00000034438	0.107559	0.557389	0.201485	0.208388	0.237773	0.282405	1.91923	0.574631	1.18206	0.825856	0.619069	1.16852	18.7127	5.04756	1.8904	0.00011691	0.01393	UP
ENSGALG00000034453	11.2737	12.9827	12.3115	9.32048	9.53905	11.504	21.5035	16.7747	16.8707	16.0217	14.0961	23.0963	720.893	471.976	0.61107	0.00038262	0.026331	UP
ENSGALG00000034456	9.22358	10.6847	7.05436	6.3444	5.40513	9.31434	19.0319	9.95852	15.5403	15.0367	17.0885	20.5301	287.134	150.67	0.93033	2.3573e-06	0.0010144	UP
ENSGALG00000034476	0.705469	0.580295	0.849548	0.846113	0.712927	0.367513	1.66128	1.51862	1.19149	1.42625	1.06344	1.32298	78.9167	41.4566	0.92873	0.00016943	0.017031	UP
ENSGALG00000034498	1.54224	3.15738	1.4445	2.82198	2.57592	2.39957	8.64879	6.05627	5.82088	6.50124	3.64924	5.81763	68.7819	27.7198	1.3111	1.126e-06	0.00064736	UP
ENSGALG00000034716	2.90121	4.98	2.71735	2.86348	2.12976	5.65314	13.6187	6.79375	8.03938	19.8778	7.75053	10.4814	196.684	66.474	1.565	0.00021917	0.019519	UP
ENSGALG00000034761	1.06219	0.515034	0.628338	0.920645	0.481977	1.08863	2.57933	2.41232	2.01072	0.921613	1.12618	2.67611	135.565	57.7606	1.2308	0.00049321	0.030737	UP
ENSGALG00000034810	20.6272	20.5869	11.914	13.6543	10.4878	18.3537	58.7146	63.4358	49.8034	49.377	18.9956	31.2796	256.358	95.1974	1.4292	1.6638e-05	0.0038082	UP
ENSGALG00000035046	11.1357	9.22156	7.18766	10.5449	14.0509	9.67285	41.7597	20.122	41.96	10.9255	20.068	32.9629	645.619	252.414	1.3549	0.00061551	0.034777	UP
ENSGALG00000035054	2.19735	2.15557	2.51544	2.7593	1.58319	1.78065	5.80864	3.4783	3.33365	3.82276	5.2462	6.74159	56.3471	27.4223	1.039	0.0004119	0.02745	UP
ENSGALG00000035117	2.54341	2.92897	2.44839	2.87448	3.31104	1.36032	6.12314	6.27142	5.2939	4.33971	3.41574	4.41335	68.4688	37.32	0.8755	0.00054643	0.032302	UP
ENSGALG00000035135	33.0596	39.968	41.7634	36.5841	41.7688	35.369	28.0704	23.3527	32.6179	21.7863	31.4874	23.8054	442.908	664.516	-0.5853	0.00062035	0.034964	DOWN
ENSGALG00000035229	0.965611	1.66799	0.581409	1.26947	0	0.482913	2.95369	4.42178	3.44545	2.80366	1.58791	8.52341	55.9103	12.3568	2.1778	0.00081368	0.041488	UP
ENSGALG00000035267	0	0.201083	0.109031	0.112767	0.257336	0.254701	1.0089	0.430553	1.10487	0.473192	0.469004	1.42274	13.5572	2.72646	2.314	0.00026484	0.021025	UP
ENSGALG00000035309	3.1072	3.4628	3.66131	2.37886	5.84959	4.82474	1.022	0.9474	1.75245	0.950681	1.67301	1.83755	26.4243	79.1545	-1.5828	2.2713e-08	5.2231e-05	DOWN
ENSGALG00000035444	3.47809	3.93745	2.73312	2.96953	4.22229	3.22458	1.68302	1.91388	1.44297	1.65078	2.30722	1.04071	55.2832	118.886	-1.1047	2.2436e-06	0.0010144	DOWN
ENSGALG00000035502	3.62634	3.60524	3.95853	3.28544	4.63687	3.08242	11.0128	8.81301	7.55881	6.10369	4.62484	9.21139	292.958	145.307	1.0116	7.4087e-06	0.0022417	UP
ENSGALG00000035565	2.95318	2.44623	3.68802	3.61363	4.71875	3.49148	5.38836	10.6459	5.02097	7.02012	6.79895	7.80972	134.462	68.9902	0.96274	0.00033026	0.024034	UP
ENSGALG00000035642	5.52413	4.826	6.63109	3.53678	5.24966	4.89025	15.7971	15.5782	7.64422	8.66084	8.40552	9.6574	335.286	165.521	1.0184	0.00022837	0.019859	UP
ENSGALG00000035743	1.58108	1.59029	1.14346	1.2408	1.57504	1.7691	2.89773	2.451	2.33946	2.51293	1.98129	3.88652	129.928	75.921	0.77514	0.00063231	0.035378	UP
ENSGALG00000035760	104.434	86.7267	107.675	98.6602	105.339	66.3333	245.437	173.079	157.844	123.102	124.155	222.53	3846.52	2220.79	0.79248	0.00026733	0.021053	UP
ENSGALG00000035901	7.898	10.5904	4.96541	6.39322	5.83578	6.53352	18.0917	11.3824	9.51214	10.164	11.0843	15.2801	112.507	66.5788	0.75689	0.00068334	0.037237	UP
ENSGALG00000035934	0.143942	0.386779	0.314579	0.185918	0.0424269	0.0839848	1.32091	1.30139	0.671114	0.82349	0.662781	1.62894	21.6285	4.15438	2.3802	8.9671e-07	0.00054265	UP
ENSGALG00000036089	671.955	698.349	1042.31	860.414	760.128	684.517	468.294	456.158	479.018	474.394	501.966	560.407	2668.38	4535.57	-0.76532	1.8045e-06	0.00090211	DOWN
ENSGALG00000036106	223.835	248.635	336.165	264.144	305.149	282.755	164.097	193.454	199.322	222.027	212.817	203.175	6461.01	9472.7	-0.55202	0.00048645	0.03048	DOWN
ENSGALG00000036142	15.8912	17.4106	12.3	12.4008	9.95335	16.0005	25.0548	19.4407	22.6021	21.7647	16.3026	25.5765	574.736	390.862	0.55624	0.0010895	0.04961	UP
ENSGALG00000036168	52.6385	69.3906	50.7371	45.9941	40.7007	50.3725	20.4249	31.0405	39.3018	37.7553	26.3531	35.5772	768.872	1315.69	-0.77501	1.8277e-05	0.003965	DOWN
ENSGALG00000036297	1.32321	1.42221	1.48722	1.28181	1.05304	1.00366	4.67716	3.80649	2.46772	2.58976	1.72627	5.39073	75.6663	29.4332	1.3622	0.00014553	0.015493	UP
ENSGALG00000036355	138.214	141.78	126.509	121.528	184.833	123.088	59.4679	115.521	75.7774	112.106	89.4818	72.6124	953.702	1585.77	-0.73357	1.6726e-05	0.0038082	DOWN
ENSGALG00000036361	303.741	383.075	437.353	337.179	354.123	325.889	172.769	248.748	271.993	283.62	285.673	227.06	5516.56	8352.11	-0.59837	0.00024724	0.020535	DOWN
ENSGALG00000036362	5.46447	6.29284	4.84768	6.24032	5.73549	4.64638	3.82773	3.19506	2.88508	3.19042	5.06291	2.65456	151.638	255.55	-0.75298	0.00010192	0.012909	DOWN
ENSGALG00000036387	0.769565	0.531735	0.528581	0.496993	0.362927	0.785771	1.64781	1.93973	1.23017	1.22811	2.33278	1.98562	65.5368	23.2635	1.4942	2.137e-07	0.00021366	UP
ENSGALG00000036492	2.72149	3.31732	1.63971	1.38755	1.91392	2.64648	3.89461	3.85888	4.05464	3.23468	3.88391	3.4148	227.4	146.095	0.63832	0.00067651	0.03704	UP
ENSGALG00000036543	2.43386	2.60768	2.20747	2.13388	3.17373	2.34581	2.51305	1.29142	1.30816	1.48888	1.73775	1.54799	103.307	164.957	-0.67515	0.00092904	0.044667	DOWN
ENSGALG00000036806	1.40045	1.9353	0.568402	0.72354	0.784287	1.71593	7.90127	3.52991	3.87103	1.77107	2.31067	4.31076	81.2286	26.0434	1.6411	0.00075871	0.040108	UP
ENSGALG00000036869	3.17044	5.68721	2.74108	3.01219	2.58781	3.30835	10.7548	5.7128	7.43151	5.83795	5.12343	7.20332	111	57.4302	0.95068	4.204e-05	0.006812	UP
ENSGALG00000036935	144.448	150.68	130.277	138.776	104.573	127.016	89.896	88.2575	109.66	95.3849	77.7074	89.0167	1048.36	1603.75	-0.61331	0.0003548	0.024951	DOWN
ENSGALG00000036950	9.15749	9.56263	19.0441	14.9604	15.2343	9.50883	6.2512	3.69957	3.72167	7.57107	4.1987	5.26941	63.9968	171.331	-1.4207	5.6758e-06	0.001881	DOWN
ENSGALG00000037002	13.5822	19.5515	17.492	5.75632	9.00756	8.17237	33.7565	34.1882	26.2914	21.4708	17.5892	39.1947	32.9043	14.8509	1.1477	0.00089385	0.043641	UP
ENSGALG00000037272	2.00404	3.74382	1.29306	1.55307	1.18138	2.68934	4.72246	3.98977	3.47048	3.29872	3.84483	3.87053	84.2383	47.793	0.81768	0.00053408	0.032067	UP
ENSGALG00000037524	2.96478	2.46582	1.92839	2.2338	3.56829	2.16229	6.21388	5.14436	5.595	2.45495	5.11924	6.93392	61.6703	31.669	0.9615	0.0007955	0.041017	UP
ENSGALG00000037606	5.78149	5.95709	6.4601	7.66401	6.99576	7.54551	14.5823	12.7551	12.7684	11.3612	8.75687	16.1157	121.777	68.1997	0.83641	0.00022972	0.019859	UP
ENSGALG00000037655	7.28673	7.65986	6.38714	7.20969	8.96549	5.78992	14.053	11.7713	11.0638	10.7394	10.5953	14.0943	976.012	616.177	0.66355	0.00010272	0.012909	UP
ENSGALG00000037750	0	0	0	0	0.139403	0	5.14385	0	4.09516	3.13298	0	0.428178	12.8827	0.143879	6.4844	0.00078388	0.040725	UP
ENSGALG00000037809	0.544966	0.836771	0.638035	0.615903	0.642514	0.87441	1.8059	1.28776	1.56534	1.18966	1.38534	1.97349	65.4666	31.2828	1.0654	0.0001286	0.014685	UP
ENSGALG00000037845	29.9879	23.6365	30.9586	29.8244	37.2414	31.1444	75.4221	59.8116	50.733	39.8502	41.7307	54.6599	390.359	234.533	0.73501	5.598e-05	0.0082301	UP
ENSGALG00000038255	3.9596	3.58877	2.6098	3.23195	3.07983	2.14984	1.45792	1.47656	1.53843	1.95397	2.74324	1.64301	47.8491	86.7294	-0.85803	0.00046181	0.0295	DOWN
ENSGALG00000038311	5.15218	5.49432	2.97472	3.14501	3.43247	4.60799	10.4634	7.86605	9.50517	8.13501	6.35328	12.709	630.007	300.117	1.0698	5.4837e-07	0.00042034	UP
ENSGALG00000038515	13.2096	11.2407	10.9935	11.546	7.61467	14.4909	23.3392	14.0895	24.2793	17.4158	14.2541	21.6358	919.837	588.2	0.64507	0.00051655	0.03132	UP
ENSGALG00000038528	52.6579	48.7356	48.4735	45.4401	46.5056	44.0502	100.993	80.454	73.9763	59.648	61.3596	87.0394	1158.74	757.242	0.61373	0.00021528	0.019377	UP
ENSGALG00000038533	0.987276	1.01061	0.513726	0.850124	0.581999	0.960065	4.13847	2.79503	1.97274	2.77455	0.883928	2.68143	22.4238	7.64452	1.5525	0.00026514	0.021025	UP
ENSGALG00000038589	952.812	1229.58	1070.7	1059.66	1010.42	1090.78	610.981	759.476	797.923	950.405	827.679	531.624	6399.67	9647.97	-0.59223	0.00045356	0.029164	DOWN
ENSGALG00000038624	8.30633	7.17413	4.28689	5.9938	5.13392	9.49505	22.4698	16.0229	12.4057	11.1017	8.39082	17.3228	333.757	163.055	1.0334	0.00024689	0.020535	UP
ENSGALG00000038667	174.37	182.932	165.439	160.25	161.525	179.112	82.6331	117.099	133.188	131.519	127.777	95.5664	1038.03	1625.5	-0.64704	0.00013094	0.014688	DOWN
ENSGALG00000038829	107.786	112.896	114.901	139.779	134.409	104.058	71.983	76.0416	95.151	95.2476	69.1721	70.1068	1025.68	1614.69	-0.65468	0.00010464	0.013007	DOWN
ENSGALG00000038850	0.500217	0.691255	0.41806	0.439838	0.503561	0.626372	1.91459	1.19546	1.12253	0.945415	0.735268	1.68255	158.977	70.5413	1.1723	3.6677e-05	0.0062475	UP
ENSGALG00000038851	26.5127	35.2637	33.2627	39.0462	39.448	36.3041	78.8051	68.4295	48.7739	51.6103	52.0295	66.0297	604.568	366.664	0.72144	3.473e-05	0.0060504	UP
ENSGALG00000038894	2.12456	1.85244	2.07519	1.29366	1.52975	1.91252	6.15836	5.53799	4.30586	2.65938	2.48057	3.33851	130.324	60.9465	1.0965	0.00022109	0.019519	UP
ENSGALG00000039088	50.7162	52.8471	42.3851	49.4824	49.5961	57.2164	29.6158	23.8732	39.2986	31.0078	40.0385	25.4716	336.444	567.549	-0.75438	1.5053e-05	0.0036771	DOWN
ENSGALG00000039197	36.3985	46.2581	42.8863	38.6312	35.2949	39.3437	19.4806	25.2682	25.2455	30.2594	32.1339	23.336	698.328	1128.32	-0.6922	4.9203e-05	0.0078032	DOWN
ENSGALG00000039200	4.39206	5.76415	2.79807	3.25807	3.67375	4.03437	9.98534	7.80523	8.0645	8.07779	5.4202	6.87786	377.816	206.179	0.87379	6.3849e-07	0.00044493	UP
ENSGALG00000039202	237.552	231.466	253.882	249.942	229.724	221.788	146.22	175.738	160.501	171.646	173.48	222.842	2967.28	4245.03	-0.51664	0.0010505	0.048265	DOWN
ENSGALG00000039288	82.7249	85.5252	82.2416	84.7679	84.5601	75.4578	150.989	148.901	128.708	113.924	110.658	133.904	7626.89	5068.75	0.58947	0.00018453	0.017585	UP
ENSGALG00000039358	14.7798	11.3468	10.7053	6.10875	14.6373	4.48419	39.3826	21.866	17.9163	18.157	16.106	28.902	116.166	53.606	1.1157	0.00051434	0.031312	UP
ENSGALG00000039660	1.37105	1.67556	1.4152	1.51789	1.21235	1.44482	3.96565	2.16179	2.04071	2.5528	2.19023	3.60976	95.1183	52.8648	0.84742	0.00042684	0.028206	UP
ENSGALG00000039691	2.47804	2.8537	2.47573	1.33362	2.67814	2.21696	7.86079	6.74391	5.4467	4.82511	2.97932	4.93558	96.2687	43.5103	1.1457	5.8895e-06	0.001881	UP
ENSGALG00000039842	51.3265	66.788	60.2397	58.8272	54.5028	59.0005	30.2723	39.1791	43.0944	46.2849	44.8968	40.6511	2268.99	3429.47	-0.59594	0.00027629	0.021538	DOWN
ENSGALG00000040004	9.21375	10.8516	10.5911	14.5039	10.3692	15.8527	6.61892	6.71239	6.06713	5.86386	7.83411	6.39829	61.1345	116.881	-0.93498	3.3347e-05	0.0058539	DOWN
ENSGALG00000040021	5.68895	5.24688	2.8764	2.65795	3.80623	3.12836	10.6002	9.28964	7.01665	8.3223	8.89579	7.24698	330.331	158.481	1.0596	6.333e-09	1.8204e-05	UP
ENSGALG00000040193	0.455112	0.482175	0.289863	0.211619	0.354141	0.477973	2.06036	1.06234	0.709324	0.657774	0.81727	1.55746	60.5295	21.293	1.5073	0.00040141	0.026991	UP
ENSGALG00000040226	9.906	12.0787	7.05311	7.59872	7.05507	10.8273	12.8426	19.0838	13.5243	16.0339	12.435	19.1741	337.971	207.953	0.70064	0.0002434	0.020535	UP
ENSGALG00000040238	465.07	619.991	688.832	499.136	465.373	580.76	209.237	337.546	347.301	390.08	401.969	290.09	2449.34	4335.09	-0.82367	3.691e-06	0.0013915	DOWN
ENSGALG00000040268	24.2224	28.0834	32.4543	27.0439	23.8872	24.7205	15.9071	15.9945	18.8679	21.2129	18.0531	18.8443	215.128	335.084	-0.63933	0.00057462	0.033201	DOWN
ENSGALG00000040306	6.12505	8.92245	9.95371	8.26623	8.425	7.92636	3.04257	6.2821	6.32864	5.05995	3.43495	4.33662	88.7515	162.372	-0.87146	6.0972e-05	0.0087632	DOWN
ENSGALG00000040316	18.8251	20.586	15.0743	17.3919	11.7311	22.6964	30.7865	25.6764	27.4572	27.8518	22.495	30.772	1379.02	940.912	0.55151	0.00070598	0.038109	UP
ENSGALG00000040331	10.548	13.8313	12.8268	9.14472	13.8731	10.7831	7.54663	8.19608	11.0254	7.64657	5.35682	7.58339	173.252	273.628	-0.65934	0.00068781	0.037392	DOWN
ENSGALG00000040521	3.08502	5.07527	6.60458	4.18391	5.72865	3.27856	13.9304	10.0701	8.18982	7.96212	7.00102	11.0122	212.984	108.568	0.97214	1.5383e-05	0.0036848	UP
ENSGALG00000040570	2.79173	1.79658	1.2305	1.27266	2.10556	1.43724	5.4419	3.37438	4.67597	3.48603	1.98489	3.90266	44.8852	22.0602	1.0248	0.00078166	0.040725	UP
ENSGALG00000040625	161.266	171.818	156.421	173.183	164.718	174.106	92.8679	109.69	110.548	133.978	131.098	118.491	769.153	1164.57	-0.59846	0.00032095	0.023977	DOWN
ENSGALG00000040658	45.5066	56.0217	68.4727	44.7679	55.0806	50.6394	22.5637	37.3172	29.4649	43.6054	47.7631	44.5124	1763.6	2640.48	-0.58228	0.001096	0.049712	DOWN
ENSGALG00000040716	400.832	437.785	354.162	468.408	357.688	358.576	224.397	269.712	282.099	321.057	311.012	253.215	2128.11	3207.25	-0.59176	0.00038702	0.026418	DOWN
ENSGALG00000040755	6.60579	11.1526	4.47938	5.38569	6.15834	7.82182	13.349	9.48306	10.4521	12.9062	9.18684	12.3803	366.537	237.195	0.62789	0.00047415	0.029964	UP
ENSGALG00000040770	19.4585	21.6248	16.1398	17.9929	21.3081	16.8405	36.7483	27.5485	27.9375	27.986	25.7811	34.5467	4717.23	3127.47	0.59294	0.0002628	0.020984	UP
ENSGALG00000040901	0.44933	1.13838	0	0.304691	0.635712	0	70.9674	0.147725	64.33	0.730595	1.49998	69.6224	730.198	9.42901	6.275	0.00013405	0.014767	UP
ENSGALG00000040926	5.1912	4.51869	7.39602	6.53979	7.69362	6.22838	3.60328	3.96626	3.87157	3.21425	3.64715	3.14419	142.709	263.976	-0.88734	3.6399e-06	0.0013915	DOWN
ENSGALG00000041047	7.00399	8.45919	13.9202	11.8046	13.7461	10.6649	3.77395	7.62881	5.74597	7.20124	5.76827	5.49031	102.066	197.336	-0.95115	5.1173e-05	0.0078483	DOWN
ENSGALG00000041165	2.30311	2.05735	4.00181	5.79658	3.8732	3.29665	13.9143	15.701	7.64491	8.76892	5.16606	17.3772	1033.26	340.199	1.6028	0.0001366	0.014888	UP
ENSGALG00000041224	122.411	104.141	133.187	134.872	90.2363	152.233	69.8956	73.856	70.1067	73.2696	63.5554	70.2995	2022.25	3751.11	-0.89135	7.1671e-08	9.695e-05	DOWN
ENSGALG00000041251	7.32448	9.21582	7.57172	9.25022	9.01937	6.93267	14.5216	10.7916	9.67572	13.2816	19.5796	14.5515	491.301	310.53	0.66188	0.00065591	0.036142	UP
ENSGALG00000041276	8.54725	7.36906	9.14432	7.01352	6.96782	7.54451	14.9414	14.178	10.3569	9.9504	9.07078	12.9602	1265.41	874.075	0.53377	0.00097582	0.046146	UP
ENSGALG00000041459	237.604	227.808	296.416	228.815	266.406	284.498	107.222	190.855	201.634	191.064	190.089	141.989	1667	2642.74	-0.66478	5.6067e-05	0.0082301	DOWN
ENSGALG00000041462	8.40118	9.53653	6.21069	7.26639	8.06549	8.16671	15.9084	13.4649	12.2905	9.43193	11.5014	14.7906	416.884	271.069	0.62099	0.00053612	0.032105	UP
ENSGALG00000041577	1.34975	1.26421	1.6519	0.889116	0.843418	1.11829	0.825746	0.443754	0.988909	0.471442	0.497194	0.415469	32.5732	67.9821	-1.0615	0.00015352	0.015974	DOWN
ENSGALG00000041592	15.3008	16.1372	14.7475	16.9756	17.6374	15.7795	44.9743	27.2815	23.0373	22.8094	22.7488	38.163	1880.63	1076.67	0.80463	0.00033238	0.024036	UP
ENSGALG00000041636	0.715861	0.607438	0.617559	0.656967	0.54971	0.758415	1.59428	1.39353	1.27984	1.004	0.780674	1.56053	65.3433	35.5405	0.87858	0.00099285	0.046581	UP
ENSGALG00000041790	17.946	19.8317	12.0355	14.3417	11.3625	16.1099	30.2805	20.8885	21.0677	20.6753	21.366	30.7838	1066.14	713.5	0.57941	0.00054324	0.032302	UP
ENSGALG00000041878	5.12442	9.47524	2.80543	4.43973	4.08453	6.34829	14.5711	11.2712	7.67959	13.3327	10.053	10.3404	301.53	152.386	0.98457	1.5191e-05	0.0036771	UP
ENSGALG00000042059	646.639	473.94	469.481	484.816	654.377	471.235	483.176	500.566	348.394	247.581	351.471	354.432	4299.11	6346	-0.56181	0.00064574	0.035868	DOWN
ENSGALG00000042099	13.653	9.61281	18.2208	26.0405	36.0928	13.4968	4.47201	7.55861	9.25854	9.20176	8.63173	7.10885	106.418	281.791	-1.4049	0.00091022	0.044157	DOWN
ENSGALG00000042170	5.37312	2.14188	1.93561	3.0029	1.4619	1.80866	12.2215	5.4354	6.40054	4.1069	6.42302	8.69986	33.5995	13.052	1.3642	0.00024459	0.020535	UP
ENSGALG00000042220	183.363	187.385	252.999	193.807	228.687	211.48	128.74	143.961	157.459	162.074	149.015	128.772	3010.17	4592.61	-0.60947	0.00018094	0.01741	DOWN
ENSGALG00000042321	39.2935	35.6452	33.9562	39.1775	47.3159	35.0708	23.7932	29.3712	34.2022	25.4321	34.2652	17.6442	1442.64	2122.47	-0.55704	0.00084068	0.042395	DOWN
ENSGALG00000042365	4.6092	4.7924	4.58108	4.07954	5.98158	4.7885	9.01052	6.59561	8.00073	7.83288	6.48907	12.7662	494.239	296.827	0.73558	0.00065695	0.036142	UP
ENSGALG00000042410	1.03664	1.08527	2.03016	2.46489	2.3333	0.824787	6.14977	3.79544	5.97878	3.7031	3.14599	5.56704	96.936	35.4913	1.4496	1.475e-07	0.00017852	UP
ENSGALG00000042490	3.70441	3.25108	2.77012	2.5901	2.89259	3.16364	9.01635	5.21777	5.83507	4.53362	5.38188	9.51345	425.84	210.355	1.0175	5.6189e-05	0.0082301	UP
ENSGALG00000042518	42.8226	56.7087	33.6796	38.48	33.0886	47.7874	90.3063	61.9126	75.3464	58.2433	47.8158	69.5789	1469.08	975.182	0.59117	0.00028924	0.022171	UP
ENSGALG00000042572	70.3444	54.7262	85.0975	69.0532	62.5852	77.936	39.6182	57.9955	52.0966	53.7572	43.8131	43.154	654.394	998.215	-0.60919	0.00042861	0.028241	DOWN
ENSGALG00000042821	30.9745	36.5469	26.2934	22.4891	19.0359	30.2068	62.2206	52.4732	42.5637	46.0688	40.1332	48.4075	2293.98	1377.75	0.73554	2.869e-06	0.0011684	UP
ENSGALG00000042877	1.79071	2.4746	2.30339	1.75782	1.30897	2.50755	5.45323	3.41462	4.29377	2.80379	3.98524	5.41475	171.21	87.3299	0.97122	4.6175e-06	0.0016591	UP
ENSGALG00000042934	7.98218	6.15789	5.29874	6.15594	13.2256	7.25725	4.50403	4.33134	0.0774258	0.070004	0.0892086	7.36682	34.2311	100.942	-1.5601	0.00045275	0.029164	DOWN
ENSGALG00000043058	5.62197	5.3798	5.02974	5.14661	6.96579	6.35332	3.89938	3.14328	4.58726	3.99239	5.60169	3.56074	350.297	514.385	-0.55427	0.0010137	0.047094	DOWN
ENSGALG00000043074	5.23149	5.05208	4.72632	3.43175	4.8627	4.30818	9.3663	8.78593	6.62596	7.7769	6.11693	8.30703	369.471	229.157	0.68913	0.00011175	0.013619	UP
ENSGALG00000043088	1.62491	1.59254	1.31145	1.60757	1.51325	1.93649	3.7895	2.13119	2.9187	2.24855	2.74602	4.17849	167.891	94.8699	0.8235	0.00015707	0.016197	UP
ENSGALG00000043113	4.73834	4.86053	3.75742	4.22367	4.40113	4.11212	10.0281	9.83451	5.75837	6.58217	8.34206	7.25924	777.777	447.855	0.79633	1.9923e-06	0.00094985	UP
ENSGALG00000043125	0.499598	0.255704	0.311957	0.107548	0.196342	0.0485828	1.07541	1.00376	1.49742	0.300862	1.0224	0.603067	16.0053	4.38132	1.8691	0.00032398	0.024033	UP
ENSGALG00000043142	0.93016	0.869058	0.526014	0.731049	1.13287	0.752631	2.30841	1.78868	1.27999	1.01461	1.41417	1.23932	83.1579	47.8835	0.79632	0.0010338	0.047739	UP
ENSGALG00000043240	1.25226	1.3745	1.37449	1.25099	1.64367	1.21584	4.66845	2.75005	3.04959	1.92655	2.52264	3.0557	147.779	70.8056	1.0615	2.275e-06	0.0010144	UP
ENSGALG00000043596	4.37828	5.08603	3.11589	2.81519	3.38121	3.43025	19.3384	8.01432	11.3081	6.45919	6.03033	12.9299	536.98	198.287	1.4373	0.00022154	0.019519	UP
ENSGALG00000043738	35.2132	28.4221	23.9999	23.9085	35.0294	23.5265	52.7345	47.8066	42.0914	36.2106	44.5159	55.5045	287.024	184.501	0.63755	0.00089118	0.043604	UP
ENSGALG00000043771	5.0903	3.82161	3.23993	4.90381	4.20268	4.6273	12.3017	9.40781	8.34494	8.15472	6.24806	9.58598	310.423	157.417	0.97965	1.729e-07	0.00018933	UP
ENSGALG00000043802	1.20827	0.324669	0.641295	1.01441	0.320524	0.77548	3.73703	3.70758	4.06412	2.87415	2.03995	3.39104	79.6714	18.3366	2.1193	5.2101e-14	1.1981e-09	UP
Novel00011	7.68637	11.59	4.01526	6.84569	9.83222	6.38998	27.9682	15.3053	23.3224	17.2748	19.1224	9.27826	1079.43	469.85	1.2	2.2123e-05	0.0045833	UP
Novel00046	1.20468	1.05513	0.810493	0.147929	0.405091	1.05433	1.66084	3.98849	2.3563	2.94275	2.24613	2.1659	148.056	47.2767	1.6469	3.0271e-06	0.0011866	UP
Novel00049	5.93252	6.80093	5.87082	5.92895	9.17426	6.81317	13.7265	11.6275	9.5611	10.5966	8.52861	11.3007	787.622	514.513	0.6143	0.00033183	0.024036	UP
Novel00080	0.81097	0.878972	0.253191	0.446713	0.456976	0.60538	1.48353	2.5159	1.96996	1.50103	2.0318	2.07302	236.939	73.9549	1.6798	2.9891e-12	3.4369e-08	UP
Novel00180	2.96731	2.92897	6.02171	1.91632	1.15574	4.3592	0.972498	0.348412	1.27054	1.46784	0.772608	0.719569	25.3769	94.8705	-1.9024	0.00097915	0.046146	DOWN
Novel00192	0.935431	0.698747	0.615671	0.404101	0.581244	0.564228	1.32758	1.31951	1.54078	0.776475	1.17866	1.30464	95.3321	51.3987	0.89123	0.00017122	0.017031	UP
Novel00249	0.336878	1.14767	0.446998	0.135974	0.310296	0.135132	1.94644	2.5612	1.3042	1.31866	1.842	0.400293	108.546	30.4298	1.8348	0.00018273	0.017509	UP
Novel00260	463.788	637.746	632.303	588.844	563.519	515.589	271.207	386.509	399.168	386.387	407.857	381.327	14038.9	22524.2	-0.68205	2.4206e-05	0.0048829	DOWN
Novel00274	48.5279	61.0424	68.6418	60.5589	51.7067	61.5665	37.2924	38.5986	43.377	44.7543	40.0458	42.6152	1456.22	2197.59	-0.5937	0.00031834	0.023924	DOWN
Novel00291	3.72365	3.28919	1.34751	2.60289	3.10556	3.22189	6.29914	5.07771	4.86168	6.34502	6.28346	5.45894	262.646	139.16	0.91637	2.0239e-06	0.00094985	UP
Novel00332	3.32267	3.3203	2.8812	3.904	3.48777	2.57028	7.2785	5.34741	4.90448	4.80226	4.65146	6.02593	497.356	310.685	0.67883	0.00011207	0.013619	UP
Novel00374	1.84669	1.8333	0.700808	1.41879	1.70332	1.25396	5.40532	3.9385	2.92654	2.8042	2.4373	4.06435	218.651	93.5266	1.2252	1.788e-06	0.00090211	UP
Novel00392	1.65918	2.0505	1.59193	1.62687	1.64605	2.00107	6.87013	4.00797	3.76005	2.75991	2.35246	5.74279	202.645	89.3915	1.1807	0.00027753	0.021561	UP
Novel00419	3.62937	5.35506	1.75279	1.81285	3.15913	3.12677	8.96241	7.08474	5.72235	8.2986	4.89593	10.9355	130.967	56.452	1.2141	1.4962e-05	0.0036771	UP
Novel00421	0.926529	0.88537	0.627777	0.591996	0.55781	0.741881	3.17585	2.3008	1.51654	1.05064	0.998474	1.79363	88.5246	37.5953	1.2355	0.00074533	0.039675	UP
Novel00451	1.92929	2.16442	1.44562	1.01284	1.59591	1.64493	2.61442	2.69061	2.53687	3.13696	2.33548	3.56654	220.026	134.294	0.71227	0.00027388	0.021422	UP
Novel00457	2.14071	2.28913	2.61882	1.37544	2.39512	2.00736	7.2609	5.09892	4.25566	3.74907	5.70794	5.84379	235.698	100.451	1.2304	1.1745e-09	4.5016e-06	UP
Novel00525	8.95609	11.5981	10.6383	8.34349	6.96363	10.2108	5.49313	4.80874	5.81098	6.15286	5.4313	6.05786	318.701	566.923	-0.83095	3.0445e-06	0.0011866	DOWN
Novel00574	2.77167	4.56986	3.10372	2.35801	2.39659	3.07023	6.67413	5.00171	5.20106	3.85254	3.90871	5.79171	480.291	305.582	0.65235	0.00026044	0.020984	UP
Novel00625	1.07266	0.790573	1.48693	1.20536	1.3279	1.57716	0.306241	0.105797	0.128602	0.19379	0.444517	0.233067	5.29276	29.8418	-2.4952	4.0039e-09	1.3153e-05	DOWN
Novel00632	1.68804	1.70094	1.33402	0.459908	0.466452	1.52353	3.71128	2.81822	2.95136	2.04899	2.06459	2.36398	48.8289	23.3557	1.064	0.00022861	0.019859	UP
Novel00647	1.23194	0.67201	0.485836	0.753723	0.860005	0.624211	2.38001	2.50473	2.46161	1.58138	1.64203	1.76101	30.8062	12.1721	1.3396	0.00025003	0.020535	UP
Novel00652	2.23161	6.04685	3.68856	4.87465	4.41092	7.77409	11.6002	9.96225	6.86358	7.19381	9.51992	10.9931	207.442	113.435	0.87084	0.00016708	0.016929	UP
Novel00683	1.49782	0.44513	1.67442	1.21694	0.982654	0.972591	4.87725	2.70045	2.17226	2.35684	1.61294	2.88701	55.2702	24.2177	1.1904	0.00055739	0.032699	UP
Novel00689	1.36632	1.50233	1.20743	0.904818	1.03752	1.50657	1.70797	1.9605	2.21342	2.21741	2.76352	3.24967	296.658	166.877	0.83002	9.6777e-05	0.012455	UP
Novel00693	7.79276	9.74605	14.2838	11.8917	9.03947	10.9636	21.4876	17.9409	17.5386	12.3756	15.5295	17.6375	395.366	261.439	0.59672	0.00086785	0.043104	UP
Novel00703	32.5592	33.845	38.2546	38.0999	43.3768	41.2304	21.2998	30.3134	19.5032	31.8187	24.9588	30.5202	357.982	539.922	-0.59286	0.00059162	0.033843	DOWN
Novel00704	442.149	380.249	541.105	456.593	451.809	410.051	283.133	261.748	245.117	241.593	348.28	312.63	5652.32	9485.34	-0.74686	2.0079e-06	0.00094985	DOWN
Novel00742	4.3385	3.45191	2.91836	2.29242	2.26691	2.83051	8.24408	4.1494	5.37874	4.13279	4.38123	6.05233	263.688	157.184	0.74638	0.00080898	0.041433	UP
Novel00755	69.384	66.3875	143.665	101.319	125.8	85.9512	17.2141	42.3056	53.0702	55.9802	63.9905	32.1533	209.777	493.603	-1.2345	6.5275e-05	0.0091542	DOWN
Novel00778	286.782	272.903	268.874	330.294	293.166	312.977	123.968	140.746	172.653	222.961	193.78	158.906	3460.58	6350.95	-0.87596	5.7909e-08	8.8779e-05	DOWN
Novel00805	6.82024	7.34606	7.05091	6.21509	6.81919	6.41953	13.2053	10.5012	11.1209	9.57335	8.09431	12.2451	1138.45	757.034	0.58863	0.00039056	0.026494	UP
Novel00811	1.65351	1.59951	1.90493	2.38666	2.32477	1.6208	3.23706	3.90049	4.0474	2.24046	2.798	2.98646	188.394	118.816	0.66502	0.00086186	0.042992	UP
Novel00823	67.4772	82.108	53.7019	50.1071	46.365	85.8451	148.855	140.514	109.269	91.4435	85.8715	145.718	3788.43	2141.42	0.82303	6.4337e-05	0.0091327	UP
Novel00825	0.941275	0.946755	0.792343	0.54248	0.463572	1.08449	2.06529	1.63544	1.58323	1.38841	1.37155	2.50795	143.115	68.7212	1.0583	6.1033e-06	0.0019226	UP
Novel00862	7.67216	5.25188	5.13916	6.37369	11.0478	3.78347	1.76799	4.39265	3.39354	1.24446	4.8943	3.25787	130.007	280.851	-1.1112	0.00097927	0.046146	DOWN
Novel00892	3.84102	3.23241	2.14472	1.93198	2.80858	2.198	5.94994	7.04256	7.08462	3.80327	5.10173	6.62042	78.1304	37.303	1.0666	2.9011e-05	0.005507	UP
Novel00939	22.7203	29.9023	30.4666	28.7422	32.912	29.302	17.8423	20.762	18.0115	24.0928	20.184	20.6971	559.92	843.583	-0.59131	0.00049713	0.030814	DOWN
Novel00956	1.04109	1.44313	1.28209	1.56881	1.32973	1.31611	4.73755	3.48615	2.73517	1.3584	2.08615	4.05811	154.258	70.8312	1.1229	0.00065686	0.036142	UP
Novel00973	3.80099	4.23129	5.63683	7.4869	5.8818	5.37802	2.51914	3.33238	2.91142	2.97569	4.37542	2.75292	48.3917	87.6819	-0.85752	0.00036678	0.025543	DOWN
Novel00996	2.83371	3.46494	3.45931	2.49831	3.04064	3.45535	8.70046	5.49558	5.9008	5.40707	5.11284	5.72901	368.09	201.678	0.86801	1.7892e-06	0.00090211	UP
Novel01020	2.5745	5.96961	4.10579	4.61719	4.76834	3.98875	5.67575	12.0957	11.7137	7.44814	6.56791	13.0397	264.811	127.672	1.0525	0.00053839	0.032158	UP
Novel01026	1.56367	3.00998	1.97996	1.19048	1.94223	2.85742	6.93383	4.8657	4.47138	5.10731	6.6879	2.37876	1072.33	467.371	1.1981	2.0869e-05	0.0044436	UP
Novel01068	10.2241	8.03623	9.72816	15.2494	18.2248	12.2859	6.37071	7.00283	6.24234	5.05758	11.6758	3.85675	80.3284	154.972	-0.94803	0.0006058	0.034397	DOWN
Novel01074	0.526219	0.375136	0.398989	0.558304	0.598254	0.767572	2.45279	1.60646	1.427	0.973316	0.576899	1.76949	56.5654	22.0069	1.362	0.00037176	0.02575	UP
Novel01101	1.13004	0.959576	1.91371	1.54804	1.31213	1.26872	1.83889	2.92712	3.15892	2.39213	2.14174	1.8911	204.587	122.5	0.73994	0.00065676	0.036142	UP
Novel01112	0.82273	0.473725	0.873334	1.22205	0.727499	0.672045	0.922767	2.02865	2.13714	1.61023	1.86256	1.8621	61.9507	30.0169	1.0453	0.0001785	0.017327	UP
Novel01155	640.973	1456.54	1467.64	1332.92	1742.97	1125.47	313.804	882.816	538.962	947.014	827.873	630.003	2529.32	4949.55	-0.96855	0.00036139	0.025272	DOWN
Novel01217	1.79258	1.74177	3.04314	2.68614	2.79867	0.931506	5.99735	5.3409	5.28885	5.00959	3.32092	5.21094	174.356	79.4569	1.1338	5.3736e-08	8.8779e-05	UP
Novel01230	2.63378	2.80557	3.39194	4.72007	2.91115	2.18982	9.66773	7.57665	5.46009	3.39027	5.22988	6.34858	92.2715	48.5842	0.9254	0.00088704	0.043604	UP
Novel01301	1.86218	1.37466	0.840775	1.5634	1.76485	0.885925	3.61246	3.29659	3.31068	2.72592	1.92374	3.22912	306.726	147.778	1.0535	5.5726e-08	8.8779e-05	UP
Novel01376	9.17193	11.3198	13.1084	13.9116	11.7938	13.9757	8.19694	5.94677	7.92225	7.82302	8.28659	10.2224	214.153	343.8	-0.68292	0.00010242	0.012909	DOWN
Novel01438	4.95702	6.20795	5.02009	5.01202	4.54761	6.12792	14.4048	9.47266	8.79064	7.86403	8.45223	10.7285	310.725	176.128	0.81901	1.0629e-05	0.0028594	UP
Novel01461	7.09243	6.74388	5.42405	4.97957	6.04133	6.37809	38.8784	19.1461	13.3917	11.7554	9.6623	29.778	302.184	96.2886	1.65	0.00099588	0.046581	UP
Novel01532	16.8437	11.7052	7.61612	7.59575	8.47421	14.7415	49.4503	27.211	20.8903	17.3138	21.395	27.2118	90.416	39.4511	1.1965	0.00055209	0.03247	UP
Novel01564	10.1225	6.62852	9.66692	9.70972	13.2508	10.4226	29.5471	23.8993	14.3767	15.1501	16.9073	23.4497	200.724	102.966	0.96304	5.1693e-05	0.0078724	UP
Novel01574	2.2285	1.84776	1.87854	2.20196	1.65527	1.71633	13.179	6.52067	4.63104	3.26112	4.25838	11.1973	154.873	44.3249	1.8049	0.00058391	0.033569	UP
Novel01587	114.789	127.794	154.581	149.497	155.521	133.987	79.4935	92.1205	98.0723	112.146	115.265	86.1373	769.127	1162.22	-0.59559	0.00034499	0.024561	DOWN
Novel01651	29.1339	35.2448	40.2421	34.7791	31.3563	36.1862	19.9538	20.8013	14.9946	23.9246	28.286	24.7772	146.391	241.195	-0.72037	0.00015017	0.015697	DOWN
Novel01732	4.83123	2.6354	3.81057	3.20217	3.1478	2.44794	12.4448	5.22484	4.57276	10.7955	5.85406	10.3591	31.1932	13.5367	1.2044	0.0010072	0.046981	UP
Novel01757	198.66	274.667	250.902	198.767	260.743	208.137	94.7763	162.794	148.883	207.411	113.601	119.111	1396.58	2405.08	-0.78418	1.2807e-05	0.0032723	DOWN
Novel01773	3.66287	2.86616	1.40748	1.9561	1.66097	2.05495	9.0975	4.12989	6.19301	2.96936	11.3519	11.6063	155.267	49.4976	1.6493	0.00050108	0.030922	UP
Novel01782	7.09226	9.22915	9.36632	5.97723	8.15273	6.26917	23.5023	13.2907	14.5967	9.73793	11.0215	21.3814	212.138	111.162	0.93234	0.00077459	0.040724	UP
Novel01787	15.0348	20.6036	15.9126	9.61254	18.0806	17.5006	39.7045	30.6463	24.3341	23.088	46.5557	53.2889	233.83	109.814	1.0904	0.00024509	0.020535	UP
Novel01839	194.587	207.637	259.776	215.225	198.834	188.785	139.158	153.012	177.822	127.805	122.958	134.113	1135.46	1777.05	-0.64621	0.00013361	0.014767	DOWN
Novel01841	25.6005	36.637	21.1845	6.74164	24.1757	23.058	44.3498	47.8031	53.1406	38.3925	50.3554	69.1931	197.707	94.1568	1.0702	5.4308e-06	0.0018583	UP
Novel01940	33.7442	32.2775	33.3558	29.4942	32.1709	30.5909	70.3821	49.8687	39.5334	41.4033	44.9171	64.6318	456.255	298.392	0.61263	0.00070123	0.038032	UP
Novel02037	45.695	17.0568	78.5409	50.2322	29.69	68.5004	16.3291	7.98245	29.882	10.895	7.71696	10.3487	467.099	1750.32	-1.9058	0.00021152	0.01915	DOWN

[truncated: 3 more sheets: Table S5b, Table S5c, Table S6]
